# Supplementary material for: Apatite MAP-3: a new homogeneous and low common lead natural reference for laser in situ U–Pb dating and Nd isotope analysis
Source: Royal Society of Chemistry journal article supplement (doi:10.1039/d2ja00405d), 2023-01-01
Supplement: d2ja00405d1.pdf [file d2ja00405d1.pdf]

Figure S1

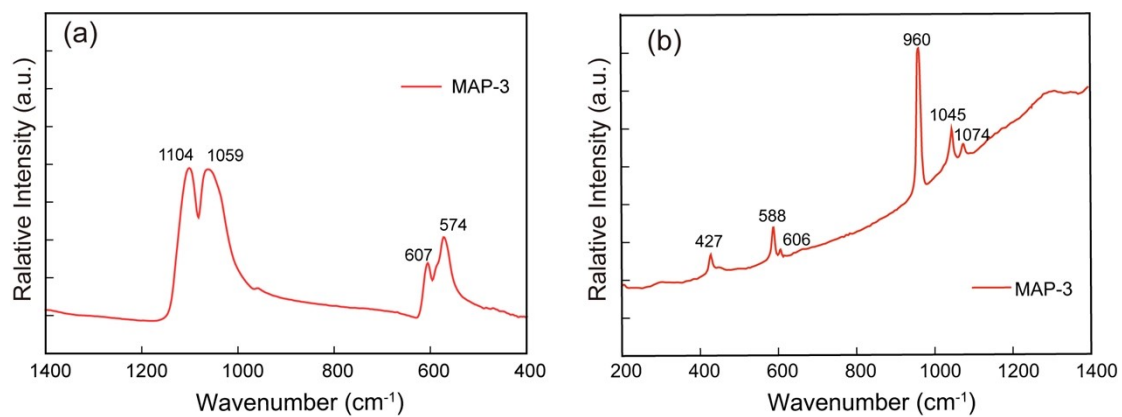

Figure S2

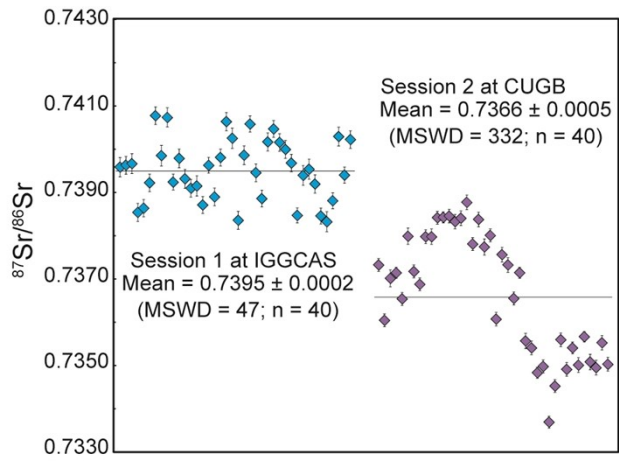

Figure S3

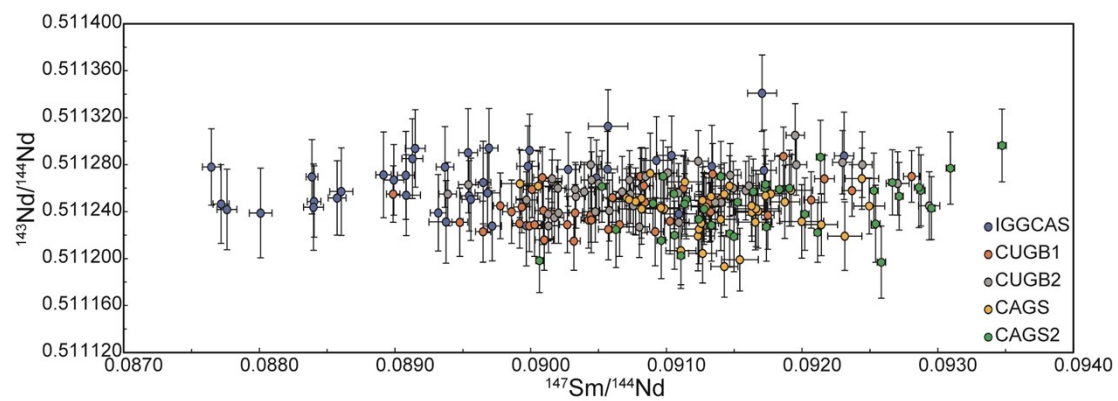

---

**Table S1 Major element composition of MAP-3 apatite by EPMA**

| No.                            | Spot<br>1 | Spot<br>2 | Spot<br>3 | Spot<br>4 | Spot<br>5 | Spot<br>6 | Spot<br>7 | Spot<br>8 | Spot<br>9 | Spot<br>10 |
|--------------------------------|-----------|-----------|-----------|-----------|-----------|-----------|-----------|-----------|-----------|------------|
| wt. %                          |           |           |           |           |           |           |           |           |           |            |
| SiO <sub>2</sub>               | 0.02      | 0.01      | 0.05      | 0.05      | 0.01      | 0.03      | 0.01      | 0.01      | 0.00      | 0.04       |
| Al <sub>2</sub> O <sub>3</sub> | 0.00      | 0.00      | 0.00      | 0.00      | 0.01      | 0.01      | 0.00      | 0.01      | 0.00      | 0.01       |
| FeO                            | 0.09      | 0.09      | 0.05      | 0.09      | 0.09      | 0.08      | 0.07      | 0.06      | 0.06      | 0.05       |
| MnO                            | 0.04      | 0.01      | 0.00      | 0.03      | 0.01      | 0.00      | 0.00      | 0.02      | 0.00      | 0.01       |
| MgO                            | 0.03      | 0.01      | 0.03      | 0.02      | 0.02      | 0.01      | 0.00      | 0.01      | 0.00      | 0.01       |
| CaO                            | 54.83     | 54.79     | 54.67     | 54.44     | 54.73     | 54.72     | 55.21     | 54.51     | 55.05     | 54.89      |
| Na <sub>2</sub> O              | 0.18      | 0.15      | 0.17      | 0.16      | 0.14      | 0.16      | 0.12      | 0.12      | 0.15      | 0.15       |
| SrO                            | 0.00      | 0.00      | 0.00      | 0.00      | 0.00      | 0.00      | 0.00      | 0.00      | 0.00      | 0.01       |
| Cr <sub>2</sub> O <sub>3</sub> | 0.00      | 0.00      | 0.00      | 0.00      | 0.04      | 0.00      | 0.00      | 0.00      | 0.00      | 0.00       |
| Ce <sub>2</sub> O <sub>3</sub> | 0.37      | 0.52      | 0.52      | 0.51      | 0.42      | 0.48      | 0.40      | 0.42      | 0.37      | 0.46       |
| La <sub>2</sub> O <sub>3</sub> | 0.14      | 0.10      | 0.13      | 0.17      | 0.14      | 0.12      | 0.16      | 0.21      | 0.12      | 0.21       |
| P <sub>2</sub> O <sub>5</sub>  | 41.69     | 41.53     | 41.37     | 41.22     | 41.34     | 41.84     | 41.21     | 41.50     | 41.35     | 40.92      |
| SO <sub>3</sub>                | 0.15      | 0.13      | 0.11      | 0.09      | 0.11      | 0.14      | 0.11      | 0.08      | 0.09      | 0.09       |
| F                              | 1.86      | 1.87      | 1.86      | 1.99      | 1.87      | 1.86      | 1.77      | 1.99      | 1.81      | 1.99       |
| Cl                             | 1.66      | 1.68      | 1.61      | 1.56      | 1.58      | 1.49      | 1.62      | 1.55      | 1.50      | 1.58       |
| Total                          | 99.88     | 99.71     | 99.43     | 99.13     | 99.36     | 99.82     | 99.58     | 99.30     | 99.40     | 99.21      |

---

---

**Table S2-1 Trace element composition of MAP-3 apatite by LA-ICPMS**

| No.                             | Session 1 | Session 2 | Session 3 | Session 4 | Session 5 |
|---------------------------------|-----------|-----------|-----------|-----------|-----------|
| $\mu\text{g}\cdot\text{g}^{-1}$ |           |           |           |           |           |
| Sr                              | 163       | 165       | —         | 163       | 153       |
| Y                               | 720       | 723       | 717       | 735       | 708       |
| Zr                              | 0.01      | 0.02      | 0.06      | 0.05      | 0.06      |
| La                              | 1543      | 1648      | 1570      | 1703      | 1491      |
| Ce                              | 3725      | 3882      | 3707      | 3944      | 3562      |
| Pr                              | 402       | 413       | 415       | 425       | 404       |
| Nd                              | 1498      | 1520      | 1537      | 1508      | 1512      |
| Sm                              | 229       | 228       | 223       | 227       | 223       |
| Eu                              | 30.5      | 30.3      | 29.7      | 30.6      | 29.3      |
| Gd                              | 187       | 187       | 188       | 181       | 185       |
| Tb                              | 21.8      | 21.7      | 21.0      | 21.2      | 21.1      |
| Dy                              | 121       | 120       | 119       | 120       | 119       |
| Ho                              | 23.9      | 23.8      | 22.9      | 23.4      | 23.2      |
| Er                              | 66.6      | 66.5      | 66.0      | 66.4      | 64.9      |
| Tm                              | 8.40      | 8.46      | 8.15      | 8.28      | 8.14      |
| Yb                              | 51.6      | 52.5      | 51.8      | 51.8      | 51.2      |
| Lu                              | 7.98      | 8.03      | 7.76      | 7.83      | 7.73      |
| Pb                              | 2.78      | 3.25      | 3.20      | 3.08      | 2.62      |
| Th                              | 20.2      | 24.5      | 24.1      | 24.6      | 21.1      |
| U                               | 15.7      | 18.2      | 18.3      | 18.6      | 16.5      |
| n                               | 42        | 30        | 28        | 40        | 30        |

\*n denotes the number of analyses

**Table S2-2 Trace element composition of MAP-3 apatite by LA-ICPMS**

| Sample                                                                | Sr      | Y   | La       | Ce       | Pr  | Nd       | Sm  | Eu   | Gd  | Tb       | Dy  | Ho   | Er   | Tm   | Yb   | Lu   | Pb   | Th   | U    |
|-----------------------------------------------------------------------|---------|-----|----------|----------|-----|----------|-----|------|-----|----------|-----|------|------|------|------|------|------|------|------|
| Session 1 of LA-ICPMS @ 33 $\mu\text{m}$ , 3 J·cm <sup>-2</sup> , 5Hz |         |     |          |          |     |          |     |      |     |          |     |      |      |      |      |      |      |      |      |
| MAP-3 01                                                              | 16<br>3 | 724 | 157<br>4 | 381<br>6 | 414 | 154<br>6 | 235 | 31.5 | 192 | 22.<br>4 | 123 | 24.4 | 67.7 | 8.63 | 52.1 | 8.29 | 2.78 | 20.2 | 15.9 |
| MAP-3 02                                                              | 17<br>2 | 708 | 150<br>1 | 370<br>7 | 404 | 150<br>0 | 227 | 31.0 | 185 | 21.<br>6 | 121 | 23.6 | 66.2 | 8.25 | 51.4 | 7.91 | 2.66 | 21.1 | 15.2 |
| MAP-3 03                                                              | 17<br>0 | 707 | 151<br>7 | 368<br>1 | 400 | 148<br>5 | 228 | 29.9 | 182 | 21.<br>4 | 120 | 23.8 | 65.5 | 8.33 | 51.1 | 7.97 | 2.67 | 20.8 | 14.8 |
| MAP-3 04                                                              | 16<br>6 | 713 | 153<br>4 | 368<br>8 | 402 | 149<br>0 | 227 | 30.2 | 185 | 21.<br>8 | 121 | 23.7 | 66.2 | 8.31 | 51.7 | 7.88 | 2.65 | 20.1 | 14.6 |
| MAP-3 05                                                              | 16<br>3 | 744 | 153<br>4 | 374<br>3 | 410 | 155<br>2 | 239 | 31.4 | 198 | 23.<br>1 | 128 | 25.0 | 69.4 | 8.84 | 52.9 | 8.28 | 2.66 | 21.2 | 14.8 |
| MAP-3 06                                                              | 16<br>2 | 745 | 156<br>7 | 374<br>1 | 407 | 152<br>0 | 236 | 31.3 | 193 | 22.<br>9 | 127 | 24.9 | 68.8 | 8.78 | 52.4 | 8.03 | 3.26 | 19.0 | 19.7 |
| MAP-3 07                                                              | 15<br>5 | 760 | 158<br>9 | 380<br>0 | 411 | 154<br>3 | 238 | 31.5 | 201 | 23.<br>4 | 130 | 25.5 | 71.3 | 8.83 | 54.0 | 8.41 | 3.15 | 19.2 | 18.5 |
| MAP-3 08                                                              | 16<br>0 | 768 | 155<br>8 | 375<br>1 | 408 | 154<br>0 | 241 | 31.0 | 202 | 23.<br>8 | 134 | 25.9 | 71.6 | 8.92 | 54.8 | 8.28 | 2.92 | 19.8 | 16.8 |
| MAP-3 09                                                              | 16<br>8 | 711 | 153<br>1 | 369<br>9 | 401 | 149<br>2 | 225 | 30.6 | 187 | 21.<br>6 | 118 | 23.4 | 65.9 | 8.33 | 50.9 | 7.96 | 2.67 | 20.4 | 14.8 |
| MAP-3 10                                                              | 15<br>8 | 700 | 154<br>5 | 371<br>6 | 398 | 147<br>6 | 222 | 29.9 | 181 | 21.<br>3 | 118 | 23.2 | 64.8 | 8.36 | 49.9 | 7.95 | 2.69 | 20.5 | 14.8 |
| MAP-3 11                                                              | 16<br>2 | 715 | 152<br>3 | 371<br>2 | 402 | 150<br>9 | 231 | 30.1 | 188 | 21.<br>8 | 122 | 23.8 | 65.6 | 8.41 | 51.5 | 7.97 | 2.67 | 19.5 | 14.5 |
| MAP-3 12                                                              | 16<br>6 | 737 | 152<br>5 | 369<br>5 | 404 | 152<br>5 | 234 | 31.0 | 194 | 22.<br>5 | 124 | 24.8 | 67.8 | 8.64 | 52.0 | 8.07 | 2.60 | 20.2 | 14.6 |

---

|          |         |     |          |          |     |          |     |      |     |          |     |      |      |      |      |      |      |      |      |
|----------|---------|-----|----------|----------|-----|----------|-----|------|-----|----------|-----|------|------|------|------|------|------|------|------|
| MAP-3 13 | 16<br>2 | 734 | 153<br>9 | 370<br>3 | 402 | 149<br>7 | 233 | 31.0 | 194 | 22.<br>4 | 123 | 24.3 | 67.3 | 8.48 | 52.5 | 8.01 | 3.29 | 18.4 | 20.1 |
| MAP-3 14 | 15<br>9 | 758 | 154<br>4 | 372<br>3 | 406 | 153<br>1 | 240 | 30.9 | 200 | 23.<br>3 | 130 | 25.9 | 70.7 | 8.80 | 53.7 | 8.15 | 2.85 | 19.5 | 16.7 |
| MAP-3 15 | 16<br>4 | 730 | 151<br>0 | 367<br>2 | 403 | 151<br>6 | 234 | 31.3 | 190 | 22.<br>6 | 124 | 24.4 | 68.4 | 8.59 | 53.1 | 8.18 | 2.69 | 20.2 | 14.6 |
| MAP-3 16 | 16<br>6 | 729 | 151<br>7 | 369<br>9 | 404 | 151<br>8 | 234 | 31.4 | 191 | 22.<br>4 | 124 | 24.4 | 68.4 | 8.68 | 52.4 | 8.13 | 2.63 | 20.2 | 14.7 |
| MAP-3 17 | 16<br>8 | 695 | 147<br>7 | 361<br>7 | 391 | 146<br>1 | 223 | 29.5 | 183 | 21.<br>3 | 116 | 23.2 | 65.0 | 8.25 | 49.7 | 7.78 | 2.42 | 19.8 | 14.3 |
| MAP-3 18 | 15<br>8 | 693 | 152<br>6 | 367<br>3 | 394 | 146<br>4 | 222 | 29.9 | 180 | 20.<br>7 | 116 | 23.2 | 64.5 | 8.19 | 49.5 | 7.82 | 2.55 | 20.0 | 14.5 |
| MAP-3 19 | 16<br>5 | 706 | 152<br>8 | 370<br>0 | 400 | 147<br>0 | 225 | 30.0 | 182 | 21.<br>2 | 118 | 23.2 | 65.7 | 8.25 | 51.0 | 7.88 | 2.64 | 20.3 | 14.7 |
| MAP-3 20 | 17<br>4 | 707 | 151<br>3 | 369<br>1 | 401 | 148<br>2 | 227 | 30.5 | 185 | 21.<br>4 | 120 | 23.6 | 65.8 | 8.36 | 51.2 | 7.92 | 2.75 | 20.7 | 15.0 |
| MAP-3 21 | 17<br>7 | 710 | 150<br>1 | 367<br>1 | 397 | 146<br>7 | 227 | 29.7 | 184 | 21.<br>5 | 120 | 23.6 | 65.6 | 8.27 | 50.9 | 7.78 | 2.68 | 19.9 | 14.6 |
| MAP-3 22 | 16<br>7 | 712 | 153<br>8 | 373<br>3 | 403 | 148<br>6 | 226 | 30.4 | 183 | 21.<br>4 | 119 | 23.6 | 65.3 | 8.08 | 50.1 | 7.93 | 2.70 | 21.0 | 15.1 |
| MAP-3 23 | 16<br>0 | 729 | 159<br>2 | 385<br>4 | 415 | 152<br>5 | 236 | 31.2 | 191 | 22.<br>4 | 122 | 24.0 | 66.4 | 8.46 | 52.3 | 7.96 | 2.84 | 20.3 | 15.7 |
| MAP-3 24 | 16<br>4 | 710 | 154<br>3 | 374<br>2 | 404 | 149<br>3 | 227 | 30.2 | 184 | 21.<br>6 | 120 | 23.6 | 66.4 | 8.32 | 50.5 | 7.84 | 2.75 | 19.7 | 15.3 |
| MAP-3 25 | 16<br>3 | 707 | 156<br>2 | 375<br>1 | 402 | 148<br>4 | 222 | 29.9 | 181 | 21.<br>1 | 117 | 23.2 | 65.2 | 8.10 | 51.5 | 7.76 | 2.79 | 20.5 | 15.6 |
| MAP-3 26 | 16<br>8 | 697 | 155<br>0 | 371<br>4 | 398 | 146<br>2 | 219 | 29.7 | 177 | 20.<br>7 | 115 | 23.1 | 64.4 | 8.04 | 50.6 | 7.94 | 2.86 | 21.2 | 15.6 |

---

|          |         |     |          |          |     |          |     |      |     |          |     |      |      |      |      |      |      |      |      |
|----------|---------|-----|----------|----------|-----|----------|-----|------|-----|----------|-----|------|------|------|------|------|------|------|------|
| MAP-3 27 | 15<br>9 | 695 | 160<br>3 | 375<br>0 | 399 | 146<br>4 | 216 | 29.8 | 176 | 20.<br>7 | 115 | 22.8 | 63.8 | 8.17 | 49.5 | 7.83 | 2.83 | 21.1 | 15.5 |
| MAP-3 28 | 16<br>2 | 693 | 157<br>9 | 375<br>1 | 396 | 146<br>1 | 218 | 29.8 | 176 | 20.<br>4 | 114 | 22.6 | 63.1 | 8.09 | 50.4 | 7.83 | 2.79 | 20.7 | 15.3 |
| MAP-3 29 | 16<br>1 | 706 | 153<br>6 | 371<br>1 | 398 | 148<br>8 | 224 | 29.9 | 182 | 21.<br>0 | 118 | 23.4 | 65.3 | 8.18 | 50.9 | 7.91 | 2.73 | 20.8 | 14.7 |
| MAP-3 30 | 16<br>5 | 760 | 153<br>5 | 370<br>3 | 401 | 152<br>3 | 238 | 30.6 | 197 | 23.<br>3 | 128 | 24.9 | 69.9 | 8.67 | 52.6 | 8.10 | 2.87 | 19.4 | 16.7 |
| MAP-3 31 | 16<br>4 | 745 | 155<br>3 | 376<br>3 | 405 | 152<br>0 | 236 | 30.8 | 193 | 22.<br>8 | 125 | 24.7 | 68.7 | 8.59 | 51.8 | 8.00 | 3.20 | 18.5 | 20.2 |
| MAP-3 32 | 16<br>0 | 722 | 154<br>9 | 377<br>0 | 406 | 151<br>9 | 232 | 30.8 | 188 | 22.<br>0 | 122 | 23.7 | 66.0 | 8.46 | 52.5 | 7.96 | 2.78 | 20.2 | 15.5 |
| MAP-3 33 | 16<br>4 | 703 | 151<br>1 | 369<br>7 | 396 | 146<br>9 | 226 | 29.7 | 183 | 21.<br>4 | 117 | 23.5 | 65.2 | 8.29 | 50.8 | 7.74 | 2.70 | 19.4 | 15.1 |
| MAP-3 34 | 16<br>0 | 714 | 155<br>8 | 375<br>8 | 397 | 148<br>0 | 227 | 30.0 | 184 | 21.<br>2 | 118 | 23.7 | 65.7 | 8.19 | 51.3 | 7.97 | 2.71 | 20.6 | 14.7 |
| MAP-3 35 | 15<br>8 | 724 | 155<br>1 | 374<br>8 | 405 | 149<br>8 | 230 | 30.4 | 186 | 22.<br>0 | 122 | 23.8 | 66.2 | 8.32 | 52.1 | 7.97 | 2.76 | 20.2 | 15.3 |
| MAP-3 36 | 15<br>2 | 737 | 157<br>0 | 378<br>6 | 410 | 152<br>7 | 237 | 31.3 | 192 | 22.<br>5 | 124 | 24.3 | 68.1 | 8.59 | 52.5 | 8.07 | 2.66 | 20.4 | 14.6 |
| MAP-3 37 | 16<br>4 | 715 | 154<br>7 | 374<br>3 | 405 | 149<br>8 | 228 | 30.7 | 187 | 21.<br>9 | 121 | 23.9 | 67.0 | 8.37 | 51.2 | 8.06 | 2.73 | 20.4 | 15.1 |
| MAP-3 38 | 15<br>9 | 750 | 155<br>3 | 371<br>6 | 402 | 151<br>0 | 235 | 31.0 | 195 | 23.<br>0 | 127 | 25.1 | 69.3 | 8.62 | 53.4 | 8.14 | 3.22 | 18.7 | 19.3 |
| MAP-3 39 | 16<br>1 | 696 | 156<br>9 | 372<br>5 | 397 | 145<br>9 | 216 | 29.8 | 176 | 20.<br>8 | 114 | 22.9 | 64.1 | 8.28 | 50.6 | 7.83 | 2.80 | 21.1 | 15.5 |
| MAP-3 40 | 16<br>4 | 701 | 156<br>9 | 374<br>8 | 401 | 149<br>1 | 221 | 30.3 | 183 | 21.<br>1 | 117 | 23.2 | 65.3 | 8.10 | 50.4 | 7.90 | 2.75 | 20.5 | 15.5 |



|                |                 |            |                  |                  |            |                  |            |             |            |                  |            |             |             |             |             |             |             |             |             |
|----------------|-----------------|------------|------------------|------------------|------------|------------------|------------|-------------|------------|------------------|------------|-------------|-------------|-------------|-------------|-------------|-------------|-------------|-------------|
| MAP-3 41       | 16<br>2         | 698        | 155<br>5         | 371<br>6         | 396        | 146<br>8         | 219        | 29.8        | 178        | 20.<br>7         | 116        | 23.0        | 64.5        | 8.11        | 50.9        | 7.82        | 2.73        | 20.9        | 15.7        |
| MAP-3 42       | 16<br>6         | 714        | 152<br>5         | 368<br>0         | 397        | 148<br>9         | 224        | 30.8        | 182        | 21.<br>4         | 119        | 23.6        | 65.8        | 8.19        | 50.7        | 7.91        | 2.72        | 20.9        | 14.9        |
| <b>Average</b> | <b>16<br/>3</b> | <b>720</b> | <b>154<br/>3</b> | <b>372<br/>5</b> | <b>402</b> | <b>149<br/>8</b> | <b>229</b> | <b>30.5</b> | <b>187</b> | <b>21.<br/>8</b> | <b>121</b> | <b>23.9</b> | <b>66.6</b> | <b>8.40</b> | <b>51.6</b> | <b>7.98</b> | <b>2.78</b> | <b>20.2</b> | <b>15.7</b> |

|           |         |          |      |      |      |      |      |      |      |          |      |      |      |           |      |           |      |      |      |
|-----------|---------|----------|------|------|------|------|------|------|------|----------|------|------|------|-----------|------|-----------|------|------|------|
| BCR-2G-01 | 33<br>3 | 31.<br>9 | 25.2 | 50.6 | 6.37 | 28.0 | 6.76 | 1.87 | 6.32 | 1.0<br>3 | 6.31 | 1.16 | 3.43 | 0.52<br>3 | 2.80 | 0.45<br>3 | 11.0 | 5.79 | 1.69 |
| BCR-2G-02 | 33<br>4 | 33.<br>4 | 25.6 | 50.1 | 6.19 | 27.4 | 6.45 | 1.95 | 6.51 | 0.9<br>8 | 6.14 | 1.20 | 3.33 | 0.46<br>6 | 3.12 | 0.48<br>0 | 10.7 | 5.93 | 1.59 |
| BCR-2G-03 | 32<br>9 | 32.<br>8 | 24.8 | 48.9 | 6.06 | 27.3 | 5.90 | 1.90 | 6.24 | 0.9<br>7 | 6.05 | 1.26 | 3.35 | 0.48<br>3 | 3.31 | 0.43<br>9 | 10.4 | 5.60 | 1.58 |
| BCR-2G-04 | 33<br>4 | 33.<br>2 | 24.7 | 50.2 | 6.20 | 27.3 | 6.32 | 1.83 | 6.64 | 0.9<br>4 | 5.80 | 1.21 | 3.68 | 0.45<br>1 | 3.03 | 0.50<br>5 | 10.4 | 5.82 | 1.62 |
| BCR-2G-05 | 33<br>0 | 32.<br>1 | 24.9 | 50.4 | 6.17 | 27.5 | 6.27 | 1.88 | 5.89 | 0.9<br>2 | 6.03 | 1.24 | 3.23 | 0.45<br>5 | 3.18 | 0.47<br>6 | 10.5 | 5.70 | 1.68 |

Session 2 of LA-ICPMS @ 33 μm, 3 J·cm<sup>-2</sup>, 5Hz

|         |         |     |          |          |     |          |     |      |     |          |     |      |      |      |      |      |      |      |      |
|---------|---------|-----|----------|----------|-----|----------|-----|------|-----|----------|-----|------|------|------|------|------|------|------|------|
| MAP-3 1 | 16<br>1 | 710 | 157<br>6 | 374<br>9 | 402 | 147<br>7 | 223 | 30.2 | 182 | 21.<br>2 | 117 | 23.0 | 65.1 | 8.42 | 51.2 | 8.01 | 3.00 | 22.6 | 16.0 |
| MAP-3 2 | 16<br>6 | 713 | 151<br>7 | 368<br>3 | 399 | 148<br>3 | 223 | 29.8 | 185 | 21.<br>6 | 118 | 23.3 | 66.2 | 8.26 | 51.8 | 7.99 | 3.05 | 21.9 | 15.9 |
| MAP-3 3 | 17<br>2 | 729 | 155<br>0 | 375<br>6 | 404 | 150<br>8 | 231 | 29.9 | 189 | 21.<br>7 | 122 | 23.9 | 67.3 | 8.43 | 53.0 | 8.07 | 2.86 | 21.3 | 16.1 |
| MAP-3 4 | 16<br>6 | 736 | 155<br>5 | 374<br>7 | 405 | 151<br>0 | 232 | 30.6 | 189 | 22.<br>0 | 122 | 24.0 | 67.4 | 8.61 | 52.9 | 8.19 | 2.78 | 21.0 | 16.0 |
| MAP-3 5 | 16      | 744 | 158      | 380      | 408 | 152      | 235 | 30.3 | 194 | 22.      | 126 | 24.5 | 68.3 | 8.71 | 53.6 | 8.18 | 2.92 | 21.4 | 15.9 |

|          |         |     |          |          |     |          |     |      |     |          |     |      |      |      |      |      |      |      |      |
|----------|---------|-----|----------|----------|-----|----------|-----|------|-----|----------|-----|------|------|------|------|------|------|------|------|
|          | 1       |     | 4        | 3        |     | 8        |     |      | 8   |          |     |      |      |      |      |      |      |      |      |
| MAP-3 6  | 16<br>2 | 741 | 158<br>6 | 381<br>6 | 410 | 152<br>9 | 234 | 30.5 | 193 | 22.<br>5 | 125 | 24.6 | 68.2 | 8.62 | 52.3 | 8.25 | 2.96 | 21.4 | 16.5 |
| MAP-3 7  | 16<br>9 | 732 | 156<br>3 | 375<br>7 | 406 | 151<br>6 | 233 | 30.3 | 190 | 22.<br>3 | 122 | 24.1 | 67.7 | 8.58 | 53.9 | 8.15 | 3.02 | 21.2 | 17.3 |
| MAP-3 8  | 16<br>1 | 737 | 160<br>6 | 385<br>2 | 414 | 153<br>8 | 234 | 30.6 | 192 | 22.<br>3 | 124 | 24.2 | 67.8 | 8.61 | 52.6 | 8.14 | 3.16 | 21.5 | 17.7 |
| MAP-3 9  | 18<br>4 | 731 | 153<br>3 | 375<br>3 | 408 | 151<br>8 | 234 | 30.2 | 190 | 22.<br>0 | 123 | 24.0 | 67.5 | 8.47 | 53.0 | 8.16 | 3.22 | 24.2 | 18.2 |
| MAP-3 10 | 16<br>3 | 731 | 160<br>8 | 385<br>0 | 411 | 153<br>8 | 235 | 30.0 | 188 | 22.<br>2 | 122 | 24.2 | 67.7 | 8.55 | 52.6 | 8.01 | 3.12 | 21.8 | 17.6 |
| MAP-3 11 | 18<br>4 | 715 | 153<br>4 | 372<br>0 | 404 | 150<br>1 | 226 | 29.8 | 187 | 22.<br>0 | 121 | 23.4 | 66.1 | 8.40 | 52.0 | 7.88 | 3.13 | 23.3 | 18.7 |
| MAP-3 12 | 17<br>6 | 730 | 164<br>5 | 389<br>4 | 419 | 154<br>8 | 235 | 30.6 | 194 | 22.<br>5 | 123 | 24.3 | 67.3 | 8.61 | 52.7 | 8.22 | 3.54 | 28.9 | 19.4 |
| MAP-3 13 | 16<br>7 | 736 | 168<br>5 | 396<br>8 | 425 | 157<br>1 | 235 | 31.1 | 193 | 22.<br>3 | 124 | 24.4 | 68.6 | 8.70 | 54.6 | 8.18 | 3.58 | 30.3 | 19.5 |
| MAP-3 14 | 17<br>4 | 734 | 169<br>9 | 399<br>3 | 426 | 157<br>0 | 233 | 30.8 | 192 | 22.<br>4 | 124 | 24.5 | 67.6 | 8.55 | 53.4 | 8.13 | 3.59 | 31.0 | 19.6 |
| MAP-3 15 | 16<br>5 | 731 | 174<br>0 | 404<br>0 | 430 | 157<br>9 | 235 | 31.5 | 192 | 22.<br>1 | 122 | 24.3 | 68.1 | 8.66 | 53.0 | 8.18 | 3.58 | 30.1 | 19.5 |
| MAP-3 16 | 16<br>9 | 722 | 170<br>7 | 400<br>1 | 423 | 156<br>2 | 233 | 30.8 | 189 | 22.<br>1 | 124 | 24.0 | 66.6 | 8.56 | 52.2 | 7.97 | 3.44 | 28.2 | 19.3 |
| MAP-3 17 | 16<br>9 | 723 | 173<br>3 | 402<br>3 | 425 | 156<br>2 | 232 | 30.9 | 189 | 22.<br>2 | 121 | 24.0 | 66.8 | 8.48 | 52.6 | 8.19 | 3.56 | 29.6 | 19.4 |
| MAP-3 18 | 16<br>0 | 720 | 171<br>6 | 398<br>4 | 421 | 154<br>4 | 228 | 30.7 | 187 | 21.<br>6 | 120 | 23.9 | 65.8 | 8.29 | 52.6 | 8.07 | 3.41 | 25.4 | 18.8 |
| MAP-3 19 | 16      | 726 | 171      | 400      | 425 | 154      | 232 | 31.2 | 189 | 21.      | 122 | 23.9 | 67.1 | 8.54 | 52.1 | 8.15 | 3.44 | 26.1 | 19.1 |

|                |                 |            |                  |                  |            |                  |            |             |            |                  |            |             |             |             |             |             |             |             |             |
|----------------|-----------------|------------|------------------|------------------|------------|------------------|------------|-------------|------------|------------------|------------|-------------|-------------|-------------|-------------|-------------|-------------|-------------|-------------|
|                | 4               |            | 9                | 1                |            | 7                |            |             |            | 9                |            |             |             |             |             |             |             |             |             |
| MAP-3 20       | 15<br>3         | 718        | 170<br>9         | 396<br>6         | 419        | 152<br>6         | 226        | 30.5        | 184        | 21.<br>5         | 120        | 23.8        | 66.3        | 8.39        | 51.8        | 8.07        | 3.42        | 23.7        | 18.6        |
| MAP-3 21       | 14<br>5         | 703        | 169<br>6         | 392<br>4         | 412        | 149<br>5         | 219        | 30.1        | 178        | 20.<br>7         | 116        | 23.0        | 64.8        | 8.18        | 51.7        | 7.83        | 3.24        | 22.0        | 18.0        |
| MAP-3 22       | 16<br>1         | 703        | 169<br>2         | 390<br>8         | 412        | 148<br>9         | 219        | 30.0        | 177        | 20.<br>8         | 115        | 22.8        | 63.9        | 8.17        | 51.4        | 7.83        | 3.19        | 24.3        | 18.2        |
| MAP-3 23       | 17<br>4         | 705        | 168<br>5         | 391<br>5         | 412        | 149<br>0         | 220        | 29.9        | 179        | 20.<br>8         | 115        | 23.1        | 64.3        | 8.22        | 51.9        | 7.79        | 3.11        | 24.1        | 18.5        |
| MAP-3 24       | 15<br>2         | 704        | 169<br>1         | 387<br>9         | 406        | 146<br>6         | 219        | 29.5        | 177        | 20.<br>6         | 115        | 22.9        | 64.1        | 8.16        | 51.3        | 7.86        | 3.09        | 22.9        | 18.2        |
| MAP-3 25       | 16<br>0         | 709        | 170<br>5         | 391<br>6         | 412        | 149<br>9         | 221        | 30.6        | 181        | 21.<br>0         | 116        | 23.3        | 64.9        | 8.42        | 52.4        | 7.83        | 3.34        | 24.6        | 18.6        |
| MAP-3 26       | 16<br>4         | 718        | 169<br>1         | 391<br>5         | 412        | 150<br>0         | 225        | 29.9        | 184        | 21.<br>3         | 118        | 23.1        | 65.2        | 8.42        | 52.2        | 7.82        | 3.36        | 25.2        | 19.0        |
| MAP-3 27       | 16<br>3         | 714        | 167<br>2         | 390<br>1         | 411        | 149<br>1         | 223        | 29.7        | 181        | 21.<br>2         | 119        | 23.3        | 64.8        | 8.32        | 52.1        | 7.91        | 3.23        | 24.2        | 18.6        |
| MAP-3 28       | 16<br>5         | 725        | 167<br>4         | 391<br>4         | 413        | 151<br>3         | 224        | 29.7        | 185        | 21.<br>4         | 120        | 23.7        | 66.7        | 8.54        | 52.5        | 7.95        | 3.31        | 24.4        | 18.6        |
| MAP-3 29       | 16<br>6         | 728        | 168<br>4         | 392<br>4         | 413        | 150<br>6         | 224        | 30.2        | 185        | 21.<br>6         | 119        | 23.7        | 65.2        | 8.49        | 52.3        | 8.02        | 3.46        | 26.0        | 18.9        |
| MAP-3 30       | 16<br>1         | 727        | 168<br>5         | 390<br>7         | 413        | 150<br>2         | 223        | 30.1        | 183        | 21.<br>3         | 120        | 23.6        | 66.3        | 8.36        | 51.7        | 7.89        | 3.29        | 23.6        | 19.0        |
| <b>Average</b> | <b>16<br/>5</b> | <b>723</b> | <b>164<br/>8</b> | <b>388<br/>2</b> | <b>413</b> | <b>152<br/>0</b> | <b>228</b> | <b>30.3</b> | <b>187</b> | <b>21.<br/>7</b> | <b>120</b> | <b>23.8</b> | <b>66.5</b> | <b>8.46</b> | <b>52.5</b> | <b>8.03</b> | <b>3.25</b> | <b>24.5</b> | <b>18.2</b> |
| BCR-2G-01      | 33<br>7         | 31.<br>0   | 25.3             | 50.6             | 6.03       | 27.6             | 6.70       | 1.99        | 6.22       | 0.9<br>5         | 6.03       | 1.25        | 3.40        | 0.49<br>0   | 3.49        | 0.48<br>0   | 10.1        | 5.86        | 1.64        |

|           |     |      |      |      |      |      |      |      |      |      |      |      |      |       |      |       |      |      |      |
|-----------|-----|------|------|------|------|------|------|------|------|------|------|------|------|-------|------|-------|------|------|------|
| BCR-2G-02 | 327 | 31.5 | 25.0 | 49.9 | 6.19 | 27.6 | 6.13 | 1.91 | 6.17 | 1.00 | 6.22 | 1.19 | 3.17 | 0.456 | 3.01 | 0.488 | 10.0 | 5.70 | 1.62 |
| BCR-2G-03 | 331 | 31.0 | 24.6 | 50.0 | 6.09 | 27.4 | 5.79 | 1.99 | 5.83 | 0.88 | 5.76 | 1.16 | 3.24 | 0.428 | 3.00 | 0.443 | 10.1 | 5.40 | 1.67 |
| BCR-2G-04 | 329 | 31.5 | 24.3 | 49.4 | 6.26 | 26.3 | 5.87 | 1.83 | 6.30 | 1.00 | 5.68 | 1.17 | 3.33 | 0.437 | 3.14 | 0.460 | 10.6 | 5.44 | 1.67 |

Session 3 of LA-ICPMS @ 50  $\mu\text{m}$ , 3 J·cm<sup>-2</sup>, 5Hz

|          |     |      |      |     |      |     |      |     |      |     |      |      |      |      |      |      |      |      |
|----------|-----|------|------|-----|------|-----|------|-----|------|-----|------|------|------|------|------|------|------|------|
| MAP-3 01 | 712 | 1535 | 3646 | 410 | 1527 | 221 | 30.2 | 187 | 20.8 | 118 | 22.6 | 67.1 | 8.12 | 51.3 | 7.79 | 2.72 | 21.0 | 15.7 |
| MAP-3 02 | 724 | 1534 | 3661 | 411 | 1546 | 226 | 30.4 | 192 | 21.4 | 121 | 23.3 | 67.1 | 8.14 | 52.0 | 7.80 | 2.74 | 20.3 | 15.8 |
| MAP-3 03 | 740 | 1549 | 3681 | 413 | 1560 | 229 | 30.4 | 196 | 21.9 | 123 | 23.7 | 68.0 | 8.33 | 53.1 | 7.82 | 2.79 | 20.9 | 15.8 |
| MAP-3 04 | 731 | 1491 | 3605 | 408 | 1540 | 228 | 30.0 | 193 | 21.6 | 122 | 23.5 | 67.2 | 8.24 | 52.2 | 7.79 | 2.72 | 20.3 | 16.3 |
| MAP-3 05 | 723 | 1484 | 3589 | 409 | 1542 | 225 | 29.8 | 190 | 21.4 | 120 | 23.2 | 66.4 | 8.18 | 52.3 | 7.67 | 2.80 | 20.4 | 17.1 |
| MAP-3 06 | 718 | 1418 | 3475 | 397 | 1490 | 221 | 29.4 | 188 | 21.4 | 120 | 23.3 | 66.4 | 8.17 | 51.9 | 7.69 | 6.14 | 20.6 | 17.0 |
| MAP-3 07 | 723 | 1393 | 3455 | 397 | 1509 | 221 | 29.7 | 190 | 21.3 | 120 | 23.1 | 66.3 | 8.15 | 52.1 | 7.76 | 3.02 | 24.2 | 18.1 |
| MAP-3 08 | 715 | 1429 | 3495 | 400 | 1517 | 221 | 29.3 | 188 | 21.0 | 119 | 22.8 | 65.6 | 7.97 | 51.6 | 7.55 | 2.96 | 21.9 | 18.1 |
| MAP-3 09 | 725 | 1505 | 3637 | 413 | 1556 | 227 | 29.6 | 193 | 21.5 | 121 | 23.5 | 67.2 | 8.24 | 52.7 | 7.87 | 3.32 | 28.6 | 19.1 |
| MAP-3 10 | 721 | 1523 | 3668 | 416 | 1559 | 226 | 29.8 | 192 | 21.4 | 121 | 23.3 | 66.5 | 8.26 | 51.9 | 7.77 | 3.34 | 29.9 | 19.2 |

---

|          |     |          |          |     |          |     |      |     |          |     |      |      |      |      |      |      |      |      |
|----------|-----|----------|----------|-----|----------|-----|------|-----|----------|-----|------|------|------|------|------|------|------|------|
| MAP-3 11 | 706 | 152<br>7 | 365<br>9 | 414 | 154<br>4 | 224 | 29.3 | 189 | 21.<br>4 | 119 | 23.0 | 65.4 | 8.07 | 51.3 | 7.67 | 3.20 | 28.8 | 19.1 |
| MAP-3 12 | 714 | 153<br>7 | 369<br>7 | 417 | 154<br>9 | 225 | 29.7 | 189 | 21.<br>2 | 120 | 23.0 | 65.4 | 8.14 | 51.7 | 7.73 | 3.23 | 27.9 | 19.0 |
| MAP-3 13 | 710 | 157<br>7 | 373<br>7 | 420 | 155<br>3 | 224 | 29.5 | 188 | 20.<br>9 | 119 | 22.8 | 65.5 | 8.14 | 51.2 | 7.86 | 3.11 | 23.9 | 18.6 |
| MAP-3 14 | 711 | 159<br>7 | 375<br>7 | 419 | 155<br>0 | 222 | 29.7 | 186 | 20.<br>9 | 117 | 22.8 | 65.5 | 8.16 | 52.0 | 7.73 | 3.13 | 24.7 | 18.8 |
| MAP-3 15 | 695 | 158<br>2 | 371<br>3 | 411 | 151<br>1 | 216 | 29.3 | 182 | 20.<br>5 | 115 | 22.2 | 63.6 | 7.92 | 50.9 | 7.57 | 2.97 | 21.5 | 17.9 |
| MAP-3 16 | 698 | 160<br>4 | 372<br>9 | 414 | 150<br>9 | 217 | 29.4 | 181 | 20.<br>2 | 115 | 22.1 | 64.1 | 8.02 | 50.3 | 7.76 | 3.06 | 23.7 | 18.3 |
| MAP-3 17 | 702 | 162<br>3 | 374<br>3 | 414 | 150<br>9 | 216 | 29.3 | 181 | 20.<br>2 | 116 | 22.3 | 64.2 | 7.97 | 51.4 | 7.74 | 3.07 | 23.0 | 18.1 |
| MAP-3 18 | 703 | 161<br>6 | 374<br>2 | 413 | 151<br>1 | 217 | 29.3 | 183 | 20.<br>5 | 116 | 22.5 | 64.3 | 8.04 | 50.6 | 7.67 | 3.12 | 23.5 | 18.4 |
| MAP-3 19 | 711 | 163<br>1 | 377<br>8 | 418 | 152<br>3 | 221 | 29.5 | 186 | 20.<br>6 | 117 | 22.6 | 65.3 | 8.06 | 51.4 | 7.76 | 3.16 | 24.4 | 18.7 |
| MAP-3 20 | 712 | 163<br>4 | 377<br>0 | 418 | 152<br>9 | 219 | 29.4 | 185 | 20.<br>6 | 118 | 22.6 | 65.2 | 8.12 | 51.5 | 7.71 | 3.13 | 23.6 | 18.5 |
| MAP-3 21 | 714 | 163<br>3 | 380<br>3 | 419 | 154<br>2 | 223 | 29.9 | 186 | 20.<br>9 | 119 | 22.9 | 66.5 | 8.18 | 51.8 | 7.84 | 3.28 | 26.1 | 19.0 |
| MAP-3 22 | 713 | 163<br>2 | 378<br>2 | 420 | 153<br>6 | 222 | 30.0 | 186 | 20.<br>8 | 118 | 22.9 | 65.6 | 8.15 | 51.9 | 7.81 | 3.19 | 23.4 | 19.1 |
| MAP-3 23 | 723 | 164<br>5 | 380<br>0 | 421 | 154<br>8 | 222 | 30.0 | 187 | 20.<br>9 | 120 | 23.1 | 66.3 | 8.21 | 52.2 | 7.83 | 3.16 | 23.6 | 19.0 |
| MAP-3 24 | 723 | 163<br>9 | 379<br>4 | 420 | 155<br>0 | 223 | 29.8 | 187 | 21.<br>1 | 120 | 23.1 | 67.3 | 8.26 | 52.4 | 7.85 | 3.23 | 25.0 | 19.2 |

|                |            |                  |                  |            |                  |            |             |            |                  |            |             |             |             |             |             |             |             |             |
|----------------|------------|------------------|------------------|------------|------------------|------------|-------------|------------|------------------|------------|-------------|-------------|-------------|-------------|-------------|-------------|-------------|-------------|
| MAP-3 25       | 736        | 166<br>0         | 383<br>5         | 426        | 156<br>8         | 226        | 30.3        | 192        | 21.<br>6         | 122        | 23.4        | 67.5        | 8.40        | 53.0        | 7.96        | 3.33        | 25.5        | 19.3        |
| MAP-3 26       | 725        | 163<br>4         | 380<br>5         | 421        | 154<br>8         | 224        | 29.9        | 190        | 21.<br>2         | 120        | 23.1        | 66.6        | 8.18        | 51.8        | 7.74        | 3.23        | 24.8        | 19.2        |
| MAP-3 27       | 718        | 162<br>6         | 379<br>8         | 420        | 155<br>2         | 223        | 29.7        | 189        | 21.<br>1         | 120        | 22.9        | 66.6        | 8.27        | 52.3        | 7.83        | 3.27        | 26.4        | 19.3        |
| MAP-3 28       | 723        | 162<br>4         | 379<br>6         | 421        | 155<br>8         | 224        | 29.7        | 187        | 21.<br>1         | 120        | 23.0        | 66.4        | 8.23        | 51.8        | 7.74        | 3.29        | 27.1        | 19.2        |
| MAP-3 29       | 720        | 162<br>6         | 379<br>3         | 420        | 154<br>4         | 222        | 29.4        | 187        | 21.<br>0         | 120        | 22.9        | 66.2        | 8.12        | 52.1        | 7.84        | 3.21        | 24.4        | 19.2        |
| MAP-3 30       | 712        | 160<br>4         | 376<br>5         | 415        | 153<br>0         | 220        | 29.2        | 185        | 20.<br>6         | 118        | 22.5        | 65.4        | 8.14        | 51.6        | 7.77        | 3.18        | 24.0        | 19.2        |
| <b>Average</b> | <b>717</b> | <b>157<br/>0</b> | <b>370<br/>7</b> | <b>415</b> | <b>153<br/>7</b> | <b>223</b> | <b>29.7</b> | <b>188</b> | <b>21.<br/>0</b> | <b>119</b> | <b>22.9</b> | <b>66.0</b> | <b>8.15</b> | <b>51.8</b> | <b>7.76</b> | <b>3.20</b> | <b>24.1</b> | <b>18.3</b> |
| BCR-2G-01      | 31.<br>3   | 24.5             | 49.9             | 5.91       | 26.9             | 6.07       | 1.83        | 5.75       | 0.9<br>8         | 6.16       | 1.21        | 3.23        | 0.47<br>0   | 3.40        | 0.48<br>1   | 10.5        | 5.56        | 1.62        |
| BCR-2G-02      | 31.<br>8   | 25.0             | 49.3             | 5.93       | 28.8             | 6.34       | 2.01        | 6.43       | 0.9<br>7         | 5.72       | 1.28        | 3.57        | 0.43<br>5   | 2.96        | 0.45<br>2   | 10.2        | 5.50        | 1.67        |
| BCR-2G-03      | 31.<br>5   | 24.9             | 50.2             | 6.14       | 27.1             | 6.36       | 1.96        | 6.39       | 1.0<br>0         | 5.60       | 1.32        | 3.23        | 0.49<br>2   | 3.27        | 0.47<br>1   | 10.3        | 5.66        | 1.67        |
| BCR-2G-04      | 32.<br>1   | 24.5             | 49.3             | 5.99       | 28.1             | 6.16       | 1.90        | 6.23       | 0.9<br>5         | 6.23       | 1.21        | 3.51        | 0.41<br>8   | 3.02        | 0.48<br>9   | 10.4        | 5.63        | 1.61        |

Session 4 of LA-ICPMS @ 50  $\mu\text{m}$ , 2 J·cm<sup>-2</sup>, 5Hz

|          |         |     |          |          |     |          |     |      |     |          |     |      |      |      |      |      |      |      |      |
|----------|---------|-----|----------|----------|-----|----------|-----|------|-----|----------|-----|------|------|------|------|------|------|------|------|
| MAP-3 01 | 15<br>8 | 734 | 174<br>9 | 398<br>7 | 423 | 151<br>8 | 220 | 30.9 | 181 | 21.<br>1 | 119 | 23.4 | 66.6 | 8.22 | 52.1 | 8.10 | 3.28 | 26.0 | 20.0 |
| MAP-3 02 | 17      | 728 | 173      | 397      | 422 | 150      | 219 | 30.5 | 179 | 20.      | 120 | 23.5 | 66.0 | 8.16 | 52.4 | 7.89 | 3.26 | 26.6 | 19.9 |

---

|          |         |     |          |          |     |          |     |      |     |          |     |      |      |      |      |      |      |      |      |
|----------|---------|-----|----------|----------|-----|----------|-----|------|-----|----------|-----|------|------|------|------|------|------|------|------|
|          | 0       |     | 1        | 4        |     | 6        |     |      | 8   |          |     |      |      |      |      |      |      |      |      |
| MAP-3 03 | 16<br>8 | 724 | 173<br>4 | 398<br>3 | 421 | 150<br>0 | 222 | 29.9 | 178 | 20.<br>9 | 119 | 23.2 | 66.3 | 8.12 | 52.5 | 7.93 | 3.25 | 25.4 | 20.2 |
| MAP-3 04 | 16<br>8 | 727 | 174<br>2 | 397<br>4 | 422 | 150<br>5 | 223 | 30.2 | 179 | 21.<br>0 | 118 | 23.3 | 66.0 | 8.25 | 52.0 | 7.92 | 3.24 | 25.8 | 20.1 |
| MAP-3 05 | 15<br>9 | 727 | 173<br>7 | 397<br>7 | 424 | 150<br>0 | 223 | 30.0 | 179 | 20.<br>9 | 118 | 23.1 | 66.2 | 8.36 | 51.3 | 7.92 | 3.21 | 25.5 | 20.0 |
| MAP-3 06 | 16<br>7 | 722 | 173<br>6 | 395<br>4 | 421 | 149<br>9 | 224 | 30.0 | 178 | 20.<br>9 | 120 | 23.1 | 65.4 | 8.23 | 51.3 | 7.86 | 3.20 | 24.9 | 20.0 |
| MAP-3 07 | 15<br>9 | 740 | 173<br>7 | 397<br>4 | 427 | 151<br>7 | 226 | 30.4 | 183 | 21.<br>3 | 121 | 23.8 | 67.6 | 8.34 | 52.8 | 7.92 | 3.26 | 25.5 | 19.8 |
| MAP-3 08 | 16<br>7 | 749 | 175<br>5 | 402<br>1 | 430 | 154<br>0 | 231 | 31.1 | 188 | 21.<br>7 | 123 | 24.0 | 68.0 | 8.32 | 53.0 | 7.88 | 3.41 | 29.5 | 20.0 |
| MAP-3 09 | 16<br>7 | 748 | 176<br>3 | 405<br>2 | 433 | 153<br>8 | 230 | 31.2 | 186 | 21.<br>9 | 123 | 24.3 | 68.9 | 8.43 | 53.0 | 8.11 | 3.31 | 27.4 | 20.0 |
| MAP-3 10 | 16<br>3 | 753 | 173<br>8 | 399<br>4 | 423 | 153<br>3 | 229 | 30.8 | 183 | 21.<br>5 | 124 | 24.1 | 68.5 | 8.54 | 52.1 | 8.00 | 3.22 | 25.3 | 19.7 |
| MAP-3 11 | 16<br>6 | 750 | 172<br>1 | 396<br>1 | 428 | 151<br>8 | 231 | 30.4 | 182 | 21.<br>4 | 121 | 23.5 | 68.1 | 8.41 | 53.1 | 7.94 | 3.28 | 26.0 | 19.7 |
| MAP-3 12 | 15<br>8 | 751 | 173<br>5 | 398<br>6 | 433 | 152<br>6 | 231 | 30.7 | 184 | 22.<br>0 | 123 | 24.0 | 68.8 | 8.56 | 51.7 | 7.95 | 3.30 | 25.6 | 19.7 |
| MAP-3 13 | 15<br>6 | 747 | 172<br>5 | 398<br>2 | 428 | 151<br>5 | 228 | 30.6 | 184 | 21.<br>4 | 121 | 23.8 | 67.5 | 8.45 | 52.3 | 7.87 | 3.20 | 24.7 | 19.6 |
| MAP-3 14 | 16<br>2 | 730 | 170<br>7 | 393<br>0 | 420 | 149<br>6 | 226 | 29.9 | 181 | 21.<br>1 | 120 | 23.3 | 66.5 | 8.28 | 52.0 | 7.92 | 3.22 | 23.5 | 18.9 |
| MAP-3 15 | 16<br>0 | 729 | 171<br>5 | 395<br>6 | 422 | 149<br>8 | 226 | 30.5 | 177 | 21.<br>2 | 118 | 22.9 | 65.7 | 8.16 | 50.5 | 7.81 | 3.15 | 24.2 | 19.0 |
| MAP-3 16 | 15      | 738 | 172      | 396      | 423 | 150      | 226 | 30.7 | 179 | 20.      | 119 | 23.7 | 65.6 | 8.33 | 52.7 | 7.75 | 3.21 | 25.2 | 19.1 |

---

|          |         |     |          |          |     |          |     |      |     |          |     |      |      |      |      |      |      |      |      |
|----------|---------|-----|----------|----------|-----|----------|-----|------|-----|----------|-----|------|------|------|------|------|------|------|------|
|          | 3       |     | 0        | 2        |     | 2        |     |      |     | 9        |     |      |      |      |      |      |      |      |      |
| MAP-3 17 | 15<br>7 | 725 | 170<br>3 | 390<br>7 | 417 | 148<br>5 | 222 | 29.8 | 175 | 20.<br>6 | 116 | 22.9 | 65.4 | 8.19 | 51.6 | 7.86 | 3.11 | 24.2 | 18.6 |
| MAP-3 18 | 15<br>7 | 730 | 171<br>1 | 393<br>5 | 419 | 148<br>6 | 222 | 30.2 | 177 | 20.<br>8 | 117 | 23.1 | 65.6 | 8.20 | 51.3 | 7.66 | 3.16 | 24.7 | 18.7 |
| MAP-3 19 | 15<br>8 | 722 | 169<br>9 | 389<br>9 | 416 | 146<br>4 | 221 | 29.7 | 175 | 20.<br>5 | 116 | 22.8 | 63.8 | 8.13 | 50.7 | 7.78 | 3.12 | 24.2 | 18.6 |
| MAP-3 20 | 15<br>6 | 711 | 169<br>2 | 386<br>6 | 414 | 145<br>0 | 218 | 29.8 | 172 | 20.<br>4 | 114 | 22.4 | 63.3 | 8.08 | 49.6 | 7.56 | 3.00 | 23.4 | 18.1 |
| MAP-3 21 | 16<br>1 | 712 | 171<br>8 | 389<br>9 | 413 | 147<br>3 | 215 | 29.5 | 174 | 20.<br>2 | 115 | 22.6 | 63.6 | 7.99 | 52.1 | 7.56 | 3.13 | 24.0 | 18.5 |
| MAP-3 22 | 15<br>5 | 713 | 169<br>6 | 390<br>1 | 416 | 146<br>2 | 220 | 29.9 | 172 | 20.<br>3 | 114 | 22.2 | 63.7 | 7.91 | 50.3 | 7.74 | 2.94 | 22.6 | 18.0 |
| MAP-3 23 | 15<br>9 | 726 | 170<br>1 | 392<br>5 | 423 | 149<br>8 | 228 | 30.5 | 178 | 21.<br>0 | 119 | 22.9 | 64.5 | 8.11 | 51.1 | 7.79 | 3.20 | 23.3 | 18.4 |
| MAP-3 24 | 15<br>6 | 740 | 172<br>3 | 398<br>7 | 435 | 152<br>7 | 231 | 31.0 | 182 | 21.<br>2 | 121 | 23.5 | 66.1 | 8.33 | 51.8 | 7.70 | 3.09 | 23.8 | 18.7 |
| MAP-3 25 | 15<br>9 | 745 | 177<br>1 | 410<br>4 | 444 | 157<br>0 | 236 | 31.2 | 187 | 21.<br>8 | 122 | 23.6 | 66.5 | 8.47 | 52.4 | 7.74 | 3.33 | 29.7 | 19.2 |
| MAP-3 26 | 16<br>1 | 734 | 175<br>3 | 404<br>3 | 440 | 153<br>7 | 232 | 31.1 | 184 | 21.<br>2 | 120 | 23.7 | 67.1 | 8.20 | 52.2 | 7.76 | 3.17 | 26.0 | 18.8 |
| MAP-3 27 | 17<br>3 | 740 | 177<br>8 | 408<br>4 | 442 | 155<br>9 | 234 | 31.3 | 186 | 21.<br>3 | 121 | 23.4 | 67.2 | 8.35 | 51.5 | 7.88 | 3.27 | 29.3 | 19.1 |
| MAP-3 28 | 17<br>0 | 736 | 174<br>7 | 404<br>8 | 441 | 155<br>0 | 234 | 30.9 | 185 | 21.<br>5 | 121 | 23.3 | 66.6 | 8.30 | 51.2 | 7.76 | 3.10 | 28.1 | 18.9 |
| MAP-3 29 | 17<br>0 | 753 | 174<br>3 | 405<br>9 | 440 | 155<br>3 | 233 | 31.2 | 188 | 22.<br>0 | 122 | 23.9 | 67.3 | 8.57 | 52.3 | 7.87 | 3.33 | 29.4 | 19.4 |
| MAP-3 30 | 16      | 736 | 167      | 393      | 428 | 151      | 230 | 31.1 | 182 | 21.      | 119 | 23.7 | 66.6 | 8.17 | 50.9 | 7.85 | 3.04 | 22.7 | 18.6 |



|                |                 |            |                  |                  |            |                  |            |             |            |                  |            |             |             |             |             |             |             |             |             |
|----------------|-----------------|------------|------------------|------------------|------------|------------------|------------|-------------|------------|------------------|------------|-------------|-------------|-------------|-------------|-------------|-------------|-------------|-------------|
|                | 3               |            | 6                | 5                |            | 3                |            |             | 4          |                  |            |             |             |             |             |             |             |             |             |
| MAP-3 31       | 17<br>9         | 752        | 167<br>4         | 395<br>0         | 435        | 154<br>5         | 234        | 31.3        | 187        | 21.<br>8         | 123        | 23.9        | 68.4        | 8.61        | 52.6        | 7.95        | 3.19        | 26.1        | 19.0        |
| MAP-3 32       | 16<br>8         | 745        | 165<br>2         | 389<br>5         | 425        | 151<br>5         | 231        | 31.2        | 184        | 21.<br>5         | 120        | 23.5        | 66.4        | 8.33        | 52.5        | 7.86        | 2.86        | 21.5        | 17.5        |
| MAP-3 33       | 16<br>8         | 750        | 164<br>8         | 388<br>6         | 425        | 151<br>9         | 233        | 31.0        | 187        | 21.<br>7         | 123        | 23.5        | 67.6        | 8.42        | 51.8        | 7.91        | 2.82        | 21.1        | 17.4        |
| MAP-3 34       | 16<br>8         | 752        | 162<br>3         | 386<br>9         | 421        | 151<br>7         | 230        | 31.1        | 186        | 21.<br>8         | 123        | 23.7        | 68.6        | 8.45        | 51.9        | 7.81        | 2.74        | 20.5        | 16.7        |
| MAP-3 35       | 16<br>4         | 754        | 163<br>0         | 387<br>3         | 423        | 151<br>4         | 236        | 31.5        | 189        | 21.<br>8         | 124        | 24.0        | 68.3        | 8.51        | 53.7        | 7.95        | 2.64        | 21.1        | 16.1        |
| MAP-3 36       | 15<br>9         | 751        | 162<br>4         | 384<br>9         | 422        | 150<br>6         | 231        | 31.0        | 185        | 21.<br>9         | 123        | 23.9        | 68.0        | 8.51        | 53.2        | 7.97        | 2.63        | 21.0        | 16.0        |
| MAP-3 37       | 16<br>7         | 741        | 160<br>5         | 382<br>1         | 418        | 148<br>6         | 226        | 30.9        | 182        | 21.<br>3         | 120        | 23.5        | 66.9        | 8.21        | 52.1        | 7.83        | 2.68        | 21.5        | 16.3        |
| MAP-3 38       | 15<br>8         | 733        | 162<br>7         | 385<br>7         | 418        | 148<br>7         | 224        | 31.1        | 178        | 20.<br>7         | 117        | 23.1        | 66.1        | 8.27        | 51.5        | 7.74        | 2.62        | 22.1        | 16.0        |
| MAP-3 39       | 16<br>5         | 699        | 159<br>3         | 376<br>0         | 406        | 144<br>2         | 215        | 29.9        | 172        | 19.<br>9         | 114        | 22.3        | 63.2        | 7.91        | 50.3        | 7.47        | 2.57        | 21.0        | 15.4        |
| MAP-3 40       | 16<br>2         | 698        | 159<br>4         | 375<br>8         | 407        | 145<br>3         | 215        | 30.2        | 173        | 20.<br>4         | 114        | 22.4        | 62.8        | 7.81        | 50.0        | 7.53        | 2.55        | 21.0        | 15.6        |
| <b>Average</b> | <b>16<br/>3</b> | <b>735</b> | <b>170<br/>3</b> | <b>394<br/>4</b> | <b>425</b> | <b>150<br/>8</b> | <b>227</b> | <b>30.6</b> | <b>181</b> | <b>21.<br/>2</b> | <b>120</b> | <b>23.4</b> | <b>66.4</b> | <b>8.28</b> | <b>51.8</b> | <b>7.83</b> | <b>3.08</b> | <b>24.6</b> | <b>18.6</b> |
| BCR-2G-01      | 34<br>1         | 32.<br>0   | 25.3             | 50.9             | 6.43       | 28.7             | 6.20       | 2.06        | 6.41       | 0.9<br>9         | 6.14       | 1.30        | 3.51        | 0.49<br>1   | 3.18        | 0.50<br>1   | 11.1        | 5.91        | 1.66        |
| BCR-2G-02      | 34<br>1         | 32.<br>0   | 25.7             | 51.8             | 6.37       | 27.4             | 6.95       | 1.96        | 6.33       | 0.9<br>9         | 6.07       | 1.28        | 3.14        | 0.51<br>8   | 2.93        | 0.45<br>9   | 10.9        | 5.79        | 1.66        |

|           |         |          |      |      |      |      |      |      |      |          |      |      |      |           |      |           |      |      |      |
|-----------|---------|----------|------|------|------|------|------|------|------|----------|------|------|------|-----------|------|-----------|------|------|------|
| BCR-2G-03 | 33<br>5 | 31.<br>9 | 25.2 | 50.8 | 6.27 | 27.2 | 6.48 | 2.05 | 6.08 | 1.0<br>0 | 5.78 | 1.30 | 3.44 | 0.50<br>3 | 3.10 | 0.43<br>6 | 10.5 | 5.74 | 1.68 |
| BCR-2G-04 | 32<br>9 | 31.<br>1 | 24.7 | 49.8 | 6.21 | 27.3 | 6.39 | 1.97 | 6.46 | 0.9<br>5 | 5.81 | 1.28 | 3.84 | 0.46<br>1 | 3.27 | 0.44<br>8 | 10.6 | 5.62 | 1.64 |
| BCR-2G-05 | 33<br>4 | 31.<br>6 | 24.9 | 50.2 | 6.27 | 26.8 | 6.15 | 1.90 | 6.09 | 1.0<br>2 | 5.89 | 1.26 | 3.38 | 0.45<br>7 | 2.87 | 0.45<br>3 | 10.5 | 5.82 | 1.62 |

Session 5 of LA-ICPMS @ 75  $\mu\text{m}$ , 3 J·cm<sup>-2</sup>, 5Hz

|          |         |     |          |          |     |          |     |      |     |          |     |      |      |      |      |      |      |      |      |
|----------|---------|-----|----------|----------|-----|----------|-----|------|-----|----------|-----|------|------|------|------|------|------|------|------|
| MAP-3 01 | 14<br>6 | 730 | 147<br>0 | 346<br>7 | 393 | 147<br>3 | 226 | 29.2 | 194 | 22.<br>3 | 124 | 24.4 | 68.1 | 8.55 | 52.6 | 8.02 | 2.80 | 17.4 | 18.8 |
| MAP-3 02 | 14<br>5 | 758 | 146<br>7 | 354<br>7 | 410 | 156<br>0 | 241 | 30.8 | 206 | 23.<br>6 | 131 | 25.6 | 70.7 | 8.74 | 54.3 | 8.17 | 2.35 | 19.2 | 14.6 |
| MAP-3 03 | 14<br>9 | 740 | 145<br>5 | 351<br>4 | 404 | 152<br>9 | 233 | 30.1 | 198 | 22.<br>7 | 127 | 24.6 | 68.8 | 8.61 | 53.3 | 8.08 | 2.38 | 19.2 | 15.2 |
| MAP-3 04 | 15<br>6 | 731 | 142<br>3 | 344<br>8 | 396 | 149<br>0 | 227 | 29.4 | 192 | 22.<br>0 | 123 | 24.1 | 67.3 | 8.40 | 52.1 | 7.93 | 2.41 | 18.8 | 15.3 |
| MAP-3 05 | 15<br>0 | 745 | 145<br>9 | 351<br>0 | 401 | 151<br>0 | 230 | 29.7 | 195 | 22.<br>3 | 125 | 24.4 | 68.0 | 8.49 | 52.9 | 7.92 | 2.43 | 19.1 | 15.3 |
| MAP-3 06 | 15<br>7 | 749 | 145<br>1 | 351<br>1 | 402 | 152<br>0 | 232 | 29.9 | 198 | 22.<br>8 | 127 | 24.7 | 68.5 | 8.50 | 52.7 | 8.01 | 2.55 | 18.9 | 16.3 |
| MAP-3 07 | 15<br>2 | 740 | 147<br>4 | 354<br>8 | 404 | 152<br>4 | 231 | 30.0 | 196 | 22.<br>4 | 125 | 24.5 | 67.6 | 8.41 | 52.6 | 7.90 | 2.69 | 18.5 | 17.7 |
| MAP-3 08 | 15<br>7 | 722 | 144<br>7 | 348<br>7 | 400 | 150<br>3 | 227 | 29.6 | 190 | 21.<br>7 | 121 | 23.7 | 66.1 | 8.22 | 51.4 | 7.72 | 2.69 | 18.3 | 18.2 |
| MAP-3 09 | 15<br>0 | 719 | 145<br>1 | 354<br>0 | 406 | 153<br>1 | 229 | 30.1 | 192 | 21.<br>9 | 122 | 23.8 | 66.1 | 8.26 | 51.8 | 7.83 | 2.36 | 19.9 | 14.5 |
| MAP-3 10 | 15<br>2 | 689 | 143<br>2 | 345<br>1 | 395 | 147<br>2 | 216 | 28.8 | 179 | 20.<br>5 | 115 | 22.5 | 63.1 | 7.92 | 49.7 | 7.58 | 2.29 | 19.4 | 14.5 |

---

|          |         |     |          |          |     |          |     |      |     |          |     |      |      |      |      |      |      |      |      |
|----------|---------|-----|----------|----------|-----|----------|-----|------|-----|----------|-----|------|------|------|------|------|------|------|------|
| MAP-3 11 | 15<br>8 | 694 | 141<br>2 | 342<br>9 | 393 | 147<br>8 | 218 | 28.9 | 181 | 20.<br>6 | 116 | 22.6 | 63.0 | 7.97 | 49.9 | 7.58 | 2.37 | 19.9 | 14.8 |
| MAP-3 12 | 15<br>2 | 698 | 144<br>5 | 350<br>0 | 403 | 151<br>1 | 223 | 29.6 | 185 | 20.<br>9 | 117 | 23.0 | 64.3 | 8.01 | 50.6 | 7.64 | 2.42 | 19.5 | 15.2 |
| MAP-3 13 | 15<br>7 | 685 | 145<br>2 | 349<br>5 | 397 | 148<br>3 | 216 | 29.0 | 179 | 20.<br>3 | 114 | 22.3 | 62.6 | 7.84 | 49.5 | 7.53 | 2.44 | 19.6 | 15.4 |
| MAP-3 14 | 15<br>3 | 674 | 146<br>5 | 350<br>8 | 394 | 145<br>9 | 210 | 28.8 | 174 | 19.<br>8 | 111 | 21.9 | 61.3 | 7.76 | 49.2 | 7.49 | 2.49 | 20.5 | 15.4 |
| MAP-3 15 | 15<br>2 | 669 | 147<br>7 | 352<br>4 | 394 | 145<br>6 | 208 | 28.5 | 171 | 19.<br>6 | 110 | 21.5 | 60.9 | 7.72 | 49.0 | 7.44 | 2.46 | 20.6 | 15.2 |
| MAP-3 16 | 15<br>1 | 673 | 149<br>3 | 352<br>3 | 396 | 146<br>5 | 210 | 28.6 | 173 | 19.<br>5 | 111 | 21.8 | 61.0 | 7.80 | 49.6 | 7.51 | 2.48 | 20.7 | 15.4 |
| MAP-3 17 | 15<br>8 | 691 | 150<br>7 | 358<br>0 | 403 | 149<br>5 | 217 | 29.4 | 179 | 20.<br>4 | 115 | 22.4 | 63.0 | 7.99 | 50.6 | 7.63 | 2.53 | 21.3 | 15.7 |
| MAP-3 18 | 14<br>9 | 703 | 152<br>3 | 360<br>3 | 405 | 150<br>8 | 220 | 29.3 | 182 | 20.<br>7 | 116 | 22.7 | 64.1 | 8.07 | 51.1 | 7.68 | 2.57 | 20.7 | 15.8 |
| MAP-3 19 | 14<br>3 | 714 | 153<br>9 | 363<br>1 | 409 | 152<br>0 | 222 | 29.7 | 184 | 21.<br>1 | 119 | 23.3 | 65.1 | 8.18 | 51.7 | 7.80 | 2.56 | 20.3 | 15.8 |
| MAP-3 20 | 15<br>5 | 722 | 153<br>6 | 363<br>9 | 411 | 153<br>1 | 225 | 29.8 | 188 | 21.<br>3 | 120 | 23.4 | 65.7 | 8.22 | 52.0 | 7.81 | 2.52 | 20.6 | 15.7 |
| MAP-3 21 | 14<br>9 | 712 | 154<br>0 | 363<br>8 | 411 | 153<br>5 | 224 | 29.6 | 186 | 21.<br>2 | 120 | 23.4 | 65.3 | 8.19 | 51.7 | 7.77 | 2.54 | 20.6 | 15.8 |
| MAP-3 22 | 14<br>8 | 709 | 155<br>0 | 365<br>5 | 411 | 153<br>7 | 224 | 29.5 | 185 | 21.<br>0 | 119 | 23.0 | 65.1 | 8.17 | 51.4 | 7.76 | 2.70 | 20.3 | 17.3 |
| MAP-3 23 | 15<br>0 | 704 | 155<br>2 | 365<br>5 | 411 | 153<br>7 | 223 | 29.3 | 183 | 20.<br>8 | 117 | 22.9 | 64.4 | 8.07 | 51.1 | 7.72 | 2.70 | 20.6 | 17.4 |
| MAP-3 24 | 14<br>6 | 696 | 154<br>9 | 363<br>6 | 410 | 152<br>9 | 221 | 29.1 | 182 | 20.<br>7 | 116 | 22.9 | 63.8 | 8.03 | 50.9 | 7.60 | 2.68 | 20.9 | 17.1 |

|                                    |                 |            |                  |                  |             |                  |             |             |             |                  |             |             |             |             |             |             |             |             |             |
|------------------------------------|-----------------|------------|------------------|------------------|-------------|------------------|-------------|-------------|-------------|------------------|-------------|-------------|-------------|-------------|-------------|-------------|-------------|-------------|-------------|
| MAP-3 25                           | 15<br>8         | 699        | 152<br>6         | 362<br>4         | 410         | 153<br>5         | 223         | 29.0        | 181         | 20.<br>8         | 117         | 22.7        | 64.2        | 8.08        | 51.3        | 7.66        | 2.88        | 23.9        | 18.4        |
| MAP-3 26                           | 14<br>9         | 695        | 153<br>6         | 362<br>6         | 409         | 152<br>4         | 219         | 28.7        | 181         | 20.<br>5         | 116         | 22.6        | 63.3        | 8.03        | 50.8        | 7.62        | 2.86        | 21.9        | 18.2        |
| MAP-3 27                           | 16<br>2         | 695        | 151<br>5         | 362<br>8         | 408         | 153<br>1         | 221         | 28.5        | 182         | 20.<br>7         | 117         | 22.8        | 64.0        | 8.07        | 50.9        | 7.67        | 3.07        | 27.6        | 18.8        |
| MAP-3 28                           | 16<br>1         | 693        | 152<br>1         | 362<br>0         | 409         | 152<br>9         | 221         | 28.6        | 181         | 20.<br>5         | 116         | 22.5        | 63.3        | 7.99        | 50.9        | 7.59        | 2.98        | 26.3        | 18.6        |
| MAP-3 29                           | 16<br>2         | 701        | 154<br>3         | 366<br>9         | 413         | 154<br>9         | 224         | 28.7        | 183         | 20.<br>7         | 117         | 22.8        | 63.9        | 8.02        | 50.7        | 7.65        | 3.16        | 29.2        | 18.8        |
| MAP-3 30                           | 16<br>2         | 699        | 153<br>3         | 365<br>5         | 411         | 154<br>5         | 222         | 28.6        | 183         | 20.<br>6         | 116         | 22.6        | 63.7        | 7.98        | 50.9        | 7.65        | 3.27        | 28.4        | 18.6        |
| <b>Average</b>                     | <b>15<br/>3</b> | <b>708</b> | <b>149<br/>1</b> | <b>356<br/>2</b> | <b>404</b>  | <b>151<br/>2</b> | <b>223</b>  | <b>29.3</b> | <b>185</b>  | <b>21.<br/>1</b> | <b>119</b>  | <b>23.2</b> | <b>64.9</b> | <b>8.14</b> | <b>51.2</b> | <b>7.73</b> | <b>2.62</b> | <b>21.1</b> | <b>16.5</b> |
| BCR-2G-01                          | 33<br>4         | 31.<br>4   | 25.5             | 50.1             | 6.22        | 27.3             | 6.24        | 1.94        | 6.50        | 0.9<br>1         | 5.92        | 1.28        | 3.23        | 0.50<br>2   | 3.26        | 0.46<br>3   | 10.5        | 5.61        | 1.76        |
| BCR-2G-02                          | 33<br>0         | 32.<br>8   | 24.6             | 49.9             | 6.06        | 28.3             | 6.52        | 1.96        | 5.84        | 0.9<br>3         | 5.69        | 1.21        | 3.93        | 0.43<br>9   | 3.22        | 0.51<br>9   | 10.4        | 5.38        | 1.60        |
| BCR-2G-03                          | 32<br>7         | 31.<br>4   | 24.5             | 49.6             | 6.12        | 26.8             | 6.28        | 1.99        | 6.33        | 0.9<br>7         | 5.96        | 1.26        | 3.16        | 0.43<br>9   | 3.39        | 0.48<br>1   | 10.4        | 5.59        | 1.66        |
| BCR-2G-04                          | 33<br>2         | 32.<br>4   | 25.0             | 49.9             | 5.99        | 27.4             | 6.04        | 1.96        | 6.31        | 1.0<br>4         | 5.83        | 1.25        | 3.17        | 0.45<br>8   | 3.06        | 0.48<br>6   | 10.6        | 5.65        | 1.65        |
| <b>MAP-3<br/>Total<br/>Average</b> | <b>16<br/>1</b> | <b>721</b> | <b>159<br/>5</b> | <b>377<br/>3</b> | <b>412</b>  | <b>151<br/>3</b> | <b>226</b>  | <b>30.0</b> | <b>185</b>  | <b>21.<br/>0</b> | <b>120</b>  | <b>23.0</b> | <b>66.0</b> | <b>8.00</b> | <b>52.0</b> | <b>8.00</b> | <b>3.00</b> | <b>23.0</b> | <b>17.0</b> |
| <b>BCR-2G</b>                      | <b>33</b>       | <b>31.</b> | <b>24.9</b>      | <b>50.1</b>      | <b>6.16</b> | <b>27.5</b>      | <b>6.29</b> | <b>1.94</b> | <b>6.24</b> | <b>0.9</b>       | <b>5.95</b> | <b>1.24</b> | <b>3.39</b> | <b>0.46</b> | <b>3.14</b> | <b>0.47</b> | <b>10.5</b> | <b>5.67</b> | <b>1.65</b> |

---

Total  
Average

2 9

7

7

1

Table S3 U-Pb ID-TIMS results for apatite sample MAP-3 from UT.

|           |                    |          |                 |             |                                         |                                        | Corrected for common Pb |                                        |        |               |                                         |          |                                        |        |                                        |        |                                         |     |    |      |  |
|-----------|--------------------|----------|-----------------|-------------|-----------------------------------------|----------------------------------------|-------------------------|----------------------------------------|--------|---------------|-----------------------------------------|----------|----------------------------------------|--------|----------------------------------------|--------|-----------------------------------------|-----|----|------|--|
| Weight    | U                  | Th/<br>U | Pb <sub>c</sub> | Pb*/<br>Pbc | <sup>206</sup> Pb/<br><sup>204</sup> Pb | Isotope Ratio                          |                         |                                        |        |               |                                         | Age (Ma) |                                        |        |                                        |        |                                         | %   |    |      |  |
|           |                    |          |                 |             |                                         | <sup>206</sup> Pb/<br><sup>238</sup> U | 2s                      | <sup>207</sup> Pb/<br><sup>235</sup> U | 2s     | Error<br>Corr | <sup>207</sup> Pb/<br><sup>206</sup> Pb | 2s       | <sup>206</sup> Pb/<br><sup>238</sup> U | 2s     | <sup>207</sup> Pb/<br><sup>235</sup> U | 2s     | <sup>207</sup> Pb/<br><sup>206</sup> Pb |     | 2s | Disc |  |
| mg        | μg·g <sup>-1</sup> |          | (pg<br>)        |             |                                         |                                        |                         |                                        |        |               |                                         |          |                                        |        |                                        |        |                                         |     |    |      |  |
| Session 1 |                    |          |                 |             |                                         |                                        |                         |                                        |        |               |                                         |          |                                        |        |                                        |        |                                         |     |    |      |  |
| A1        | 0.020              | 21       | 1.30            | 7.2         | 10.7                                    | 502                                    | 0.13230                 | 0.00030                                | 1.2073 | 0.0207        | 0.13                                    | 0.0662   | 0.0011                                 | 800.97 | 1.7                                    | 803.95 | 9.5                                     | 812 | 3  | 1.5  |  |
|           |                    |          |                 |             |                                         |                                        |                         |                                        |        |               | 2                                       |          |                                        |        | 3                                      |        | 2                                       |     | 6  |      |  |
| A2        | 0.015              | 32       | 1.27            | 6.4         | 13.2                                    | 626                                    | 0.13219                 | 0.00071                                | 1.2154 | 0.0173        | 0.37                                    | 0.0667   | 0.0009                                 | 800.34 | 4.0                                    | 807.67 | 7.9                                     | 828 | 2  | 3.5  |  |
|           |                    |          |                 |             |                                         |                                        |                         |                                        |        |               | 9                                       |          |                                        |        | 3                                      |        | 3                                       |     | 8  |      |  |
| A3        | 0.015              | 31       | 1.30            | 7.7         | 10.8                                    | 506                                    | 0.13218                 | 0.00031                                | 1.1995 | 0.0208        | 0.13                                    | 0.0658   | 0.0011                                 | 800.29 | 1.7                                    | 800.34 | 9.6                                     | 800 | 3  | 0.0  |  |
|           |                    |          |                 |             |                                         |                                        |                         |                                        |        |               | 3                                       |          |                                        |        | 9                                      |        | 0                                       |     | 6  |      |  |
| A4        | 0.015              | 38       | 1.27            | 4.4         | 22.6                                    | 1099                                   | 0.13219                 | 0.00073                                | 1.2050 | 0.0108        | 0.63                                    | 0.0661   | 0.0005                                 | 800.37 | 4.1                                    | 802.90 | 4.9                                     | 810 | 1  | 1.3  |  |
|           |                    |          |                 |             |                                         |                                        |                         |                                        |        |               | 3                                       |          |                                        |        | 6                                      |        | 8                                       |     | 5  |      |  |
| A5        | 0.020              | 27       | 1.26            | 6.7         | 14.4                                    | 680                                    | 0.13177                 | 0.00043                                | 1.2123 | 0.0165        | 0.24                                    | 0.0668   | 0.0009                                 | 797.98 | 2.4                                    | 806.25 | 7.6                                     | 829 | 2  | 4.0  |  |
|           |                    |          |                 |             |                                         |                                        |                         |                                        |        |               | 8                                       |          |                                        |        | 7                                      |        | 0                                       |     | 8  |      |  |
| Session 2 |                    |          |                 |             |                                         |                                        |                         |                                        |        |               |                                         |          |                                        |        |                                        |        |                                         |     |    |      |  |
| A1        | 0.015              | 32       | 1.29            | 3.4         | 25.0                                    | 1202                                   | 0.13289                 | 0.00124                                | 1.2130 | 0.0124        | 0.92                                    | 0.0662   | 0.0003                                 | 804.35 | 7.0                                    | 806.57 | 5.6                                     | 813 | 8  | 1.1  |  |
|           |                    |          |                 |             |                                         |                                        |                         |                                        |        |               | 7                                       |          |                                        |        | 6                                      |        | 9                                       |     |    |      |  |
| A2        | 0.015              | 33       | 1.31            | 5.5         | 15.8                                    | 753                                    | 0.13268                 | 0.00036                                | 1.2144 | 0.0139        | 0.28                                    | 0.0664   | 0.0007                                 | 803.14 | 2.0                                    | 807.20 | 6.3                                     | 818 | 2  | 2.0  |  |
|           |                    |          |                 |             |                                         |                                        |                         |                                        |        |               | 7                                       |          |                                        |        | 4                                      |        | 6                                       |     | 3  |      |  |
| A3        | 0.015              | 30       | 1.29            | 3.8         | 20.1                                    | 974                                    | 0.13238                 | 0.00133                                | 1.2018 | 0.0140        | 0.88                                    | 0.0658   | 0.0004                                 | 801.40 | 7.5                                    | 801.42 | 6.4                                     | 801 | 1  | 0.0  |  |
|           |                    |          |                 |             |                                         |                                        |                         |                                        |        |               | 1                                       |          |                                        |        | 7                                      |        | 5                                       |     | 2  |      |  |
| A4        | 0.015              | 28       | 1.27            | 3.2         | 22.4                                    | 1097                                   | 0.13224                 | 0.00030                                | 1.2110 | 0.0055        | 0.61                                    | 0.0664   | 0.0002                                 | 800.61 | 1.7                                    | 805.63 | 2.5                                     | 820 | 8  | 2.5  |  |
|           |                    |          |                 |             |                                         |                                        |                         |                                        |        |               | 0                                       |          |                                        |        | 4                                      |        | 4                                       |     |    |      |  |
| A5        | 0.015              | 33       | 1.28            | 7.5         | 11.9                                    | 558                                    | 0.13219                 | 0.00026                                | 1.2130 | 0.0103        | 0.32                                    | 0.0666   | 0.0005                                 | 800.33 | 1.5                                    | 806.55 | 4.7                                     | 824 | 1  | 3.0  |  |

---

|    |       |    |      |     |      |      |         |         |        |        |      |        |        |        |     |        |     |     |   |     |
|----|-------|----|------|-----|------|------|---------|---------|--------|--------|------|--------|--------|--------|-----|--------|-----|-----|---|-----|
|    |       |    |      |     |      |      |         |         |        |        | 0    |        |        | 0      |     | 1      |     | 7   |   |     |
| A6 | 0.015 | 36 | 1.36 | 3.7 | 24.6 | 1203 | 0.13194 | 0.00038 | 1.2035 | 0.0059 | 0.66 | 0.0662 | 0.0002 | 798.91 | 2.1 | 802.19 | 2.7 | 811 | 8 | 1.6 |
|    |       |    |      |     |      |      |         |         |        |        | 5    |        |        |        | 6   |        | 1   |     |   |     |

---

Notes:

Grain fragment weights are estimated.

Th/U calculated from radiogenic  $^{208}\text{Pb}/^{206}\text{Pb}$  ratio and  $^{207}\text{Pb}/^{206}\text{Pb}$  age assuming concordance.

Pbc is total common Pb (assuming 1 pg has the isotopic composition of laboratory blank:  $^{206}\text{Pb}/^{204}\text{Pb}=18.49\pm0.4\%$ ;  $^{207}\text{Pb}/^{204}\text{Pb}=15.59\pm0.4\%$ ;  $^{208}\text{Pb}/^{204}\text{Pb}=39.36\pm0.4\%$ , and initial Pb in excess of 1 pg has been corrected using the model of Stacey and Kramers (1975).

$^{206}\text{Pb}/^{204}\text{Pb}$  corrected for fractionation and common Pb in the spike.

Pb/U ratios corrected for fractionation, common Pb in the spike, and blank.

Disc is percent discordance for the given  $^{207}\text{Pb}/^{206}\text{Pb}$  age

Error Corr is correlation coefficients of X-Y errors on the concordia plot.

Decay constants are those of Jaffey et al. (1971):  $^{238}\text{U}$  and  $^{235}\text{U}$  are  $1.55125 \times 10^{-10}/\text{yr}$  and  $9.8485 \times 10^{-10}/\text{yr}$ .

$^{238}\text{U}/^{235}\text{U}$  ratio of 137.818 from Hiess et al. (2012) was used.

Table S4 U-Pb ID-TIMS results for apatite sample MAP-3 from CAGS.

| No. | Weight/g | Contents ( $\mu\text{g}\cdot\text{g}^{-1}$ ) |                 |       |                                          |      | ratio                               |      |                                     |      |                                      |      | Age(Ma)                                 |            |                                         |            | Rho<br>(7/5-6/8) |                                          |            |
|-----|----------|----------------------------------------------|-----------------|-------|------------------------------------------|------|-------------------------------------|------|-------------------------------------|------|--------------------------------------|------|-----------------------------------------|------------|-----------------------------------------|------------|------------------|------------------------------------------|------------|
|     |          | Pb                                           | Pb <sub>c</sub> | U     | <sup>206</sup> Pb<br>/ <sup>204</sup> Pb | Err% | <sup>206</sup> Pb/ <sup>238</sup> U | Err% | <sup>207</sup> Pb/ <sup>235</sup> U | Err% | <sup>207</sup> Pb/ <sup>206</sup> Pb | Err% | <sup>206</sup> Pb<br>/ <sup>238</sup> U | 1 $\sigma$ | <sup>207</sup> Pb<br>/ <sup>235</sup> U | 1 $\sigma$ |                  | <sup>207</sup> Pb<br>/ <sup>206</sup> Pb | 1 $\sigma$ |
| 1   | 0.00062  | 3.89                                         | 1.22            | 16.04 | 106.93                                   | 0.08 | 0.13211                             | 0.29 | 1.2004                              | 1.05 | 0.06593                              | 0.90 | 799.9                                   | 2.3        | 800.8                                   | 8.4        | 803.3            | 37.7                                     | 0.623      |
| 2   | 0.00073  | 4.20                                         | 1.46            | 16.28 | 100.48                                   | 0.05 | 0.13211                             | 0.27 | 1.2056                              | 0.91 | 0.06622                              | 0.72 | 799.9                                   | 2.2        | 803.2                                   | 7.3        | 812.3            | 30.0                                     | 0.794      |
| 3   | 0.00130  | 3.13                                         | 0.41            | 16.31 | 274.90                                   | 0.08 | 0.13233                             | 0.11 | 1.2016                              | 0.55 | 0.06589                              | 0.49 | 801.1                                   | 0.9        | 801.3                                   | 4.4        | 801.8            | 20.4                                     | 0.635      |
| 4   | 0.00091  | 3.39                                         | 0.69            | 16.00 | 187.79                                   | 0.09 | 0.13218                             | 0.15 | 1.2001                              | 0.55 | 0.06588                              | 0.47 | 800.3                                   | 1.2        | 800.6                                   | 4.4        | 801.6            | 19.6                                     | 0.678      |
| 5   | 0.00075  | 4.28                                         | 1.44            | 17.04 | 105.45                                   | 0.08 | 0.13224                             | 0.25 | 1.1963                              | 0.89 | 0.06564                              | 0.71 | 800.6                                   | 2.0        | 798.9                                   | 7.1        | 794.0            | 29.9                                     | 0.792      |
| 6   | 0.00085  | 4.53                                         | 1.77            | 16.25 | 87.61                                    | 0.06 | 0.13250                             | 0.34 | 1.1846                              | 1.11 | 0.06487                              | 0.86 | 802.1                                   | 2.8        | 793.5                                   | 8.8        | 769.3            | 36.4                                     | 0.790      |

Notes:

1. <sup>206</sup>Pb/<sup>204</sup>Pb without correction. Pb/U ratios corrected for fractionation, common Pb in the spike, and blank.
2.  $\lambda_{238} = 1.55125\text{E-}10$ ,  $\lambda_{235} = 9.8485\text{E-}10$  (Jaffey et al., 1971);  $^{238}\text{U}/^{235}\text{U} = 137.818$  (Hiess et al., 2012);
3. Pbc is common Pb, Pb is total Pb (assuming 19-28 pg has the isotopic composition of laboratory blank).
4. Initial Pb has been corrected using the model of Stacey and Kramers (1975).
5. Assuming 1-3 pg U and 19-28 pg Pb has the isotopic composition of laboratory blank



**Table S5 U-Pb data for MAP-3 apatite laser in situ analyses**

| Comments                                                                      | Composition ( $\mu\text{g}\cdot\text{g}^{-1}$ ) <sup>1)</sup> |      |      |      | Ratios                           |       |                                  |        |                                   |        | Age (Ma)                        |                                  |     |
|-------------------------------------------------------------------------------|---------------------------------------------------------------|------|------|------|----------------------------------|-------|----------------------------------|--------|-----------------------------------|--------|---------------------------------|----------------------------------|-----|
|                                                                               | Pb                                                            | Th   | U    | Th/U | $^{207}\text{Pb}/^{235}\text{U}$ | 2SE   | $^{206}\text{Pb}/^{238}\text{U}$ | 2SE    | $^{207}\text{Pb}/^{206}\text{Pb}$ | 2SE    | $^{207}\text{Pb}$ corrected Age | $^{206}\text{Pb}/^{238}\text{U}$ | 2SE |
| Session 1 of LA-Q-ICPMS @ 33 $\mu\text{m}$ , 3 J $\cdot\text{cm}^{-2}$ , 5 Hz |                                                               |      |      |      |                                  |       |                                  |        |                                   |        |                                 |                                  |     |
| MAP-3 01                                                                      | 2.78                                                          | 20.2 | 15.9 | 1.27 | 1.167                            | 0.090 | 0.1278                           | 0.0047 | 0.0621                            | 0.0047 | 778                             |                                  | 28  |
| MAP-3 02                                                                      | 2.66                                                          | 21.1 | 15.2 | 1.39 | 1.303                            | 0.097 | 0.1264                           | 0.0042 | 0.0720                            | 0.0053 | 761                             |                                  | 25  |
| MAP-3 03                                                                      | 2.67                                                          | 20.8 | 14.8 | 1.41 | 1.272                            | 0.097 | 0.1301                           | 0.0048 | 0.0678                            | 0.0051 | 786                             |                                  | 28  |
| MAP-3 04                                                                      | 2.65                                                          | 20.1 | 14.6 | 1.37 | 1.340                            | 0.100 | 0.1293                           | 0.0050 | 0.0737                            | 0.0065 | 776                             |                                  | 30  |
| MAP-3 05                                                                      | 2.66                                                          | 21.2 | 14.8 | 1.43 | 1.246                            | 0.093 | 0.1302                           | 0.0047 | 0.0672                            | 0.0052 | 787                             |                                  | 28  |
| MAP-3 06                                                                      | 3.26                                                          | 19.0 | 19.7 | 0.96 | 1.245                            | 0.085 | 0.1300                           | 0.0040 | 0.0659                            | 0.0046 | 787                             |                                  | 24  |
| MAP-3 07                                                                      | 3.15                                                          | 19.2 | 18.5 | 1.04 | 1.210                            | 0.083 | 0.1314                           | 0.0043 | 0.0637                            | 0.0046 | 798                             |                                  | 26  |
| MAP-3 08                                                                      | 2.92                                                          | 19.8 | 16.8 | 1.18 | 1.267                            | 0.079 | 0.1320                           | 0.0044 | 0.0667                            | 0.0045 | 798                             |                                  | 26  |
| MAP-3 09                                                                      | 2.67                                                          | 20.4 | 14.8 | 1.38 | 1.361                            | 0.099 | 0.1306                           | 0.0046 | 0.0728                            | 0.0059 | 785                             |                                  | 27  |
| MAP-3 10                                                                      | 2.69                                                          | 20.5 | 14.8 | 1.39 | 1.265                            | 0.096 | 0.1315                           | 0.0044 | 0.0665                            | 0.0051 | 796                             |                                  | 26  |
| MAP-3 11                                                                      | 2.67                                                          | 19.5 | 14.5 | 1.35 | 1.320                            | 0.10  | 0.1317                           | 0.004  | 0.0681                            | 0.005  | 795                             |                                  | 28  |

---

|          |      |      |      |      |       |           |        |                 |        |            |     |    |
|----------|------|------|------|------|-------|-----------|--------|-----------------|--------|------------|-----|----|
| MAP-3 12 | 2.60 | 20.2 | 14.6 | 1.39 | 1.230 | 0.10<br>0 | 0.1302 | 0.004<br>7<br>6 | 0.0639 | 0.005<br>7 | 790 | 28 |
| MAP-3 13 | 3.29 | 18.4 | 20.1 | 0.92 | 1.239 | 0.08<br>9 | 0.1300 | 0.004<br>2      | 0.0633 | 0.004<br>5 | 790 | 25 |
| MAP-3 14 | 2.85 | 19.5 | 16.7 | 1.17 | 1.335 | 0.09<br>8 | 0.1290 | 0.004<br>1      | 0.0697 | 0.005<br>4 | 778 | 24 |
| MAP-3 15 | 2.69 | 20.2 | 14.6 | 1.39 | 1.251 | 0.09<br>8 | 0.1349 | 0.004<br>7      | 0.0675 | 0.005<br>7 | 815 | 28 |
| MAP-3 16 | 2.63 | 20.2 | 14.7 | 1.38 | 1.300 | 0.08<br>3 | 0.1325 | 0.003<br>6      | 0.0694 | 0.004<br>4 | 799 | 21 |
| MAP-3 17 | 2.42 | 19.8 | 14.3 | 1.38 | 1.181 | 0.09<br>4 | 0.1227 | 0.004<br>2      | 0.0698 | 0.006<br>0 | 741 | 25 |
| MAP-3 18 | 2.55 | 20.0 | 14.5 | 1.38 | 1.149 | 0.09<br>2 | 0.1278 | 0.004<br>0      | 0.0637 | 0.005<br>0 | 777 | 24 |
| MAP-3 19 | 2.64 | 20.3 | 14.7 | 1.39 | 1.320 | 0.11<br>0 | 0.1319 | 0.004<br>1      | 0.0693 | 0.005<br>7 | 795 | 25 |
| MAP-3 20 | 2.75 | 20.7 | 15.0 | 1.38 | 1.350 | 0.10<br>0 | 0.1345 | 0.003<br>9      | 0.0696 | 0.005<br>4 | 810 | 23 |
| MAP-3 21 | 2.68 | 19.9 | 14.6 | 1.36 | 1.340 | 0.10<br>0 | 0.1372 | 0.004<br>3      | 0.0672 | 0.005<br>1 | 828 | 26 |
| MAP-3 22 | 2.70 | 21.0 | 15.1 | 1.39 | 1.307 | 0.08<br>2 | 0.1315 | 0.004<br>5      | 0.0702 | 0.005<br>1 | 792 | 27 |
| MAP-3 23 | 2.84 | 20.3 | 15.7 | 1.29 | 1.302 | 0.08<br>9 | 0.1361 | 0.003<br>9      | 0.0651 | 0.004<br>5 | 824 | 23 |
| MAP-3 24 | 2.75 | 19.7 | 15.3 | 1.28 | 1.324 | 0.08<br>3 | 0.1342 | 0.004<br>2      | 0.0671 | 0.004<br>3 | 811 | 25 |
| MAP-3 25 | 2.79 | 20.5 | 15.6 | 1.32 | 1.281 | 0.08      | 0.1341 | 0.004           | 0.0677 | 0.004      | 810 | 24 |

---

|          |      |      |      |      |       |           |        |            |        |            |     |    |
|----------|------|------|------|------|-------|-----------|--------|------------|--------|------------|-----|----|
| MAP-3 26 | 2.86 | 21.2 | 15.6 | 1.36 | 1.380 | 0.10<br>0 | 0.1370 | 0.004<br>2 | 0.0698 | 0.005<br>3 | 825 | 25 |
| MAP-3 27 | 2.83 | 21.1 | 15.5 | 1.36 | 1.350 | 0.10<br>0 | 0.1402 | 0.004<br>6 | 0.0668 | 0.005<br>3 | 846 | 27 |
| MAP-3 28 | 2.79 | 20.7 | 15.3 | 1.36 | 1.388 | 0.09<br>7 | 0.1365 | 0.004<br>4 | 0.0703 | 0.005<br>2 | 821 | 26 |
| MAP-3 29 | 2.73 | 20.8 | 14.7 | 1.42 | 1.333 | 0.08<br>5 | 0.1342 | 0.004<br>3 | 0.0699 | 0.004<br>7 | 808 | 25 |
| MAP-3 30 | 2.87 | 19.4 | 16.7 | 1.16 | 1.273 | 0.08<br>5 | 0.1293 | 0.003<br>8 | 0.0699 | 0.005<br>0 | 780 | 23 |
| MAP-3 31 | 3.20 | 18.5 | 20.2 | 0.91 | 1.128 | 0.06<br>9 | 0.1253 | 0.003<br>5 | 0.0641 | 0.004<br>2 | 761 | 21 |
| MAP-3 32 | 2.78 | 20.2 | 15.5 | 1.30 | 1.262 | 0.08<br>9 | 0.1302 | 0.003<br>8 | 0.0677 | 0.004<br>8 | 787 | 23 |
| MAP-3 33 | 2.70 | 19.4 | 15.1 | 1.28 | 1.339 | 0.09<br>6 | 0.1329 | 0.004<br>1 | 0.0675 | 0.005<br>2 | 803 | 24 |
| MAP-3 34 | 2.71 | 20.6 | 14.7 | 1.40 | 1.480 | 0.10<br>0 | 0.1335 | 0.004<br>4 | 0.0743 | 0.005<br>4 | 800 | 26 |
| MAP-3 35 | 2.76 | 20.2 | 15.3 | 1.32 | 1.257 | 0.09<br>3 | 0.1331 | 0.003<br>9 | 0.0641 | 0.004<br>9 | 807 | 23 |
| MAP-3 36 | 2.66 | 20.4 | 14.6 | 1.39 | 1.410 | 0.11<br>0 | 0.1331 | 0.003<br>9 | 0.0730 | 0.005<br>9 | 799 | 23 |
| MAP-3 37 | 2.73 | 20.4 | 15.1 | 1.35 | 1.300 | 0.11<br>0 | 0.1335 | 0.004<br>0 | 0.0679 | 0.005<br>8 | 806 | 24 |
| MAP-3 38 | 3.22 | 18.7 | 19.3 | 0.97 | 1.277 | 0.08<br>7 | 0.1330 | 0.003<br>8 | 0.0666 | 0.004<br>7 | 804 | 23 |
| MAP-3 39 | 2.80 | 21.1 | 15.5 | 1.36 | 1.177 | 0.09      | 0.1328 | 0.004      | 0.0639 | 0.005      | 806 | 24 |

|                                                                          |      |      |      |      |       |           |        |            |        |            |     |    |
|--------------------------------------------------------------------------|------|------|------|------|-------|-----------|--------|------------|--------|------------|-----|----|
| MAP-3 40                                                                 | 2.75 | 20.5 | 15.5 | 1.32 | 1.162 | 0.07<br>7 | 0.1303 | 0.003<br>8 | 0.0659 | 0.004<br>5 | 789 | 23 |
| MAP-3 41                                                                 | 2.73 | 20.9 | 15.7 | 1.33 | 1.217 | 0.09<br>5 | 0.1259 | 0.004<br>5 | 0.0715 | 0.005<br>9 | 758 | 27 |
| MAP-3 42                                                                 | 2.72 | 20.9 | 14.9 | 1.40 | 1.120 | 0.09<br>4 | 0.1294 | 0.004<br>1 | 0.0613 | 0.005<br>1 | 788 | 25 |
| Session 2 of LA-Q-ICPMS @ 33 $\mu\text{m}$ , 3 J·cm <sup>-2</sup> , 5 Hz |      |      |      |      |       |           |        |            |        |            |     |    |
| MAP-3 01                                                                 | 3.00 | 22.6 | 16.0 | 1.41 | 1.282 | 0.08<br>7 | 0.1353 | 0.006<br>5 | 0.0653 | 0.004<br>5 | 819 | 38 |
| MAP-3 02                                                                 | 3.05 | 21.9 | 15.9 | 1.38 | 1.420 | 0.10<br>0 | 0.1383 | 0.006<br>8 | 0.0710 | 0.004<br>9 | 831 | 40 |
| MAP-3 03                                                                 | 2.86 | 21.3 | 16.1 | 1.33 | 1.187 | 0.08<br>8 | 0.1316 | 0.006<br>5 | 0.0622 | 0.004<br>6 | 800 | 39 |
| MAP-3 04                                                                 | 2.78 | 21.0 | 16.0 | 1.32 | 1.250 | 0.10<br>0 | 0.1294 | 0.006<br>2 | 0.0668 | 0.005<br>6 | 783 | 37 |
| MAP-3 05                                                                 | 2.92 | 21.4 | 15.9 | 1.34 | 1.225 | 0.08<br>8 | 0.1357 | 0.006<br>7 | 0.0622 | 0.004<br>5 | 824 | 40 |
| MAP-3 06                                                                 | 2.96 | 21.4 | 16.5 | 1.30 | 1.208 | 0.09<br>5 | 0.1345 | 0.006<br>4 | 0.0625 | 0.004<br>9 | 817 | 38 |
| MAP-3 07                                                                 | 3.02 | 21.2 | 17.3 | 1.22 | 1.243 | 0.09<br>0 | 0.1336 | 0.006<br>3 | 0.0651 | 0.004<br>8 | 809 | 37 |
| MAP-3 08                                                                 | 3.16 | 21.5 | 17.7 | 1.21 | 1.330 | 0.10<br>0 | 0.1342 | 0.006<br>4 | 0.0686 | 0.005<br>2 | 809 | 38 |
| MAP-3 09                                                                 | 3.22 | 24.2 | 18.2 | 1.32 | 1.232 | 0.07<br>9 | 0.1300 | 0.006<br>2 | 0.0661 | 0.004<br>4 | 787 | 37 |
| MAP-3 10                                                                 | 3.12 | 21.8 | 17.6 | 1.23 | 1.246 | 0.08      | 0.1340 | 0.006      | 0.0658 | 0.005      | 811 | 38 |

---

|          |      |      |      |      |       |           |        |            |        |            |     |    |
|----------|------|------|------|------|-------|-----------|--------|------------|--------|------------|-----|----|
| MAP-3 11 | 3.13 | 23.3 | 18.7 | 1.25 | 1.203 | 0.08<br>4 | 0.1271 | 0.006<br>3 | 0.0657 | 0.004<br>7 | 771 | 37 |
| MAP-3 12 | 3.54 | 28.9 | 19.4 | 1.49 | 1.192 | 0.07<br>7 | 0.1324 | 0.006<br>3 | 0.0627 | 0.004<br>3 | 804 | 37 |
| MAP-3 13 | 3.58 | 30.3 | 19.5 | 1.55 | 1.215 | 0.07<br>6 | 0.1316 | 0.006<br>3 | 0.0645 | 0.004<br>3 | 798 | 37 |
| MAP-3 14 | 3.59 | 31.0 | 19.6 | 1.58 | 1.242 | 0.08<br>6 | 0.1293 | 0.006<br>2 | 0.0659 | 0.004<br>6 | 783 | 37 |
| MAP-3 15 | 3.58 | 30.1 | 19.5 | 1.54 | 1.183 | 0.08<br>2 | 0.1321 | 0.006<br>5 | 0.0637 | 0.004<br>8 | 802 | 38 |
| MAP-3 16 | 3.44 | 28.2 | 19.3 | 1.46 | 1.149 | 0.07<br>7 | 0.1299 | 0.006<br>2 | 0.0621 | 0.004<br>6 | 790 | 37 |
| MAP-3 17 | 3.56 | 29.6 | 19.4 | 1.52 | 1.261 | 0.09<br>6 | 0.1308 | 0.006<br>3 | 0.0661 | 0.004<br>9 | 792 | 37 |
| MAP-3 18 | 3.41 | 25.4 | 18.8 | 1.35 | 1.252 | 0.09<br>5 | 0.1339 | 0.006<br>5 | 0.0647 | 0.004<br>8 | 811 | 38 |
| MAP-3 19 | 3.44 | 26.1 | 19.1 | 1.37 | 1.211 | 0.08<br>5 | 0.1337 | 0.006<br>5 | 0.0633 | 0.004<br>7 | 812 | 38 |
| MAP-3 20 | 3.42 | 23.7 | 18.6 | 1.28 | 1.290 | 0.08<br>3 | 0.1366 | 0.006<br>5 | 0.0656 | 0.004<br>3 | 826 | 38 |
| MAP-3 21 | 3.24 | 22.0 | 18.0 | 1.22 | 1.289 | 0.08<br>5 | 0.1373 | 0.006<br>7 | 0.0641 | 0.004<br>3 | 832 | 39 |
| MAP-3 22 | 3.19 | 24.3 | 18.2 | 1.34 | 1.192 | 0.07<br>7 | 0.1324 | 0.006<br>2 | 0.0627 | 0.004<br>3 | 804 | 37 |
| MAP-3 23 | 3.11 | 24.1 | 18.5 | 1.30 | 1.084 | 0.06<br>7 | 0.1269 | 0.006<br>3 | 0.0596 | 0.004<br>1 | 775 | 37 |
| MAP-3 24 | 3.09 | 22.9 | 18.2 | 1.26 | 1.223 | 0.08      | 0.1281 | 0.006      | 0.0661 | 0.004      | 776 | 37 |

|          |      |      |      |      |       |           |        |            |        |            |     |    |
|----------|------|------|------|------|-------|-----------|--------|------------|--------|------------|-----|----|
| MAP-3 25 | 3.34 | 24.6 | 18.6 | 1.32 | 1.298 | 0.08<br>9 | 0.1330 | 0.006<br>4 | 0.0662 | 0.004<br>5 | 805 | 38 |
| MAP-3 26 | 3.36 | 25.2 | 19.0 | 1.32 | 1.228 | 0.08<br>7 | 0.1302 | 0.006<br>3 | 0.0637 | 0.004<br>5 | 791 | 37 |
| MAP-3 27 | 3.23 | 24.2 | 18.6 | 1.30 | 1.175 | 0.08<br>1 | 0.1308 | 0.006<br>4 | 0.0621 | 0.004<br>5 | 796 | 38 |
| MAP-3 28 | 3.31 | 24.4 | 18.6 | 1.31 | 1.269 | 0.09<br>4 | 0.1332 | 0.006<br>6 | 0.0651 | 0.005<br>0 | 807 | 39 |
| MAP-3 29 | 3.46 | 26.0 | 18.9 | 1.38 | 1.300 | 0.07<br>8 | 0.1349 | 0.006<br>4 | 0.0661 | 0.004<br>2 | 816 | 38 |
| MAP-3 30 | 3.29 | 23.6 | 19.0 | 1.24 | 1.254 | 0.08<br>2 | 0.1305 | 0.006<br>2 | 0.0657 | 0.004<br>3 | 791 | 37 |

Session 3 of LA-Q-ICPMS @ 50  $\mu\text{m}$ , 3 J·cm<sup>-2</sup>, 5 Hz

|         |      |      |      |      |       |           |        |            |        |            |     |    |
|---------|------|------|------|------|-------|-----------|--------|------------|--------|------------|-----|----|
| MAP_3_1 | 2.72 | 21.0 | 15.7 | 1.34 | 1.346 | 0.05<br>7 | 0.1365 | 0.003<br>4 | 0.0712 | 0.002<br>8 | 820 | 20 |
| MAP_3_2 | 2.74 | 20.3 | 15.8 | 1.28 | 1.356 | 0.05<br>6 | 0.1372 | 0.003<br>4 | 0.0711 | 0.003<br>1 | 825 | 20 |
| MAP_3_3 | 2.79 | 20.9 | 15.8 | 1.32 | 1.409 | 0.06<br>2 | 0.1375 | 0.003<br>5 | 0.0734 | 0.003<br>3 | 824 | 21 |
| MAP_3_4 | 2.72 | 20.3 | 16.3 | 1.25 | 1.273 | 0.05<br>1 | 0.1344 | 0.003<br>4 | 0.0679 | 0.002<br>8 | 811 | 20 |
| MAP_3_5 | 2.80 | 20.4 | 17.1 | 1.19 | 1.291 | 0.04<br>8 | 0.1319 | 0.003<br>3 | 0.0695 | 0.002<br>4 | 795 | 19 |
| MAP_3_6 | 6.14 | 20.6 | 17.0 | 1.21 | 6.160 | 0.56<br>0 | 0.1995 | 0.009<br>4 | 0.2170 | 0.013<br>0 | 980 | 47 |

---

|          |      |      |      |      |       |           |        |            |        |            |     |    |
|----------|------|------|------|------|-------|-----------|--------|------------|--------|------------|-----|----|
| MAP_3_7  | 3.02 | 24.2 | 18.1 | 1.34 | 1.243 | 0.04<br>8 | 0.1322 | 0.003<br>2 | 0.0679 | 0.002<br>7 | 798 | 19 |
| MAP_3_8  | 2.96 | 21.9 | 18.1 | 1.21 | 1.243 | 0.04<br>7 | 0.1311 | 0.003<br>3 | 0.0681 | 0.002<br>6 | 792 | 19 |
| MAP_3_9  | 3.32 | 28.6 | 19.1 | 1.50 | 1.312 | 0.04<br>8 | 0.1323 | 0.003<br>3 | 0.0712 | 0.002<br>6 | 796 | 19 |
| MAP_3_10 | 3.34 | 29.9 | 19.2 | 1.56 | 1.265 | 0.05<br>1 | 0.1318 | 0.003<br>3 | 0.0683 | 0.002<br>5 | 796 | 19 |
| MAP_3_11 | 3.20 | 28.8 | 19.1 | 1.51 | 1.259 | 0.09<br>3 | 0.1253 | 0.004<br>3 | 0.0736 | 0.004<br>6 | 753 | 25 |
| MAP_3_12 | 3.23 | 27.9 | 19.0 | 1.47 | 1.218 | 0.05<br>2 | 0.1301 | 0.003<br>2 | 0.0669 | 0.002<br>9 | 787 | 19 |
| MAP_3_13 | 3.11 | 23.9 | 18.6 | 1.28 | 1.229 | 0.05<br>5 | 0.1325 | 0.003<br>3 | 0.0663 | 0.003<br>0 | 802 | 20 |
| MAP_3_14 | 3.13 | 24.7 | 18.8 | 1.32 | 1.259 | 0.05<br>3 | 0.1312 | 0.003<br>3 | 0.0680 | 0.002<br>7 | 793 | 19 |
| MAP_3_15 | 2.97 | 21.5 | 17.9 | 1.20 | 1.235 | 0.05<br>0 | 0.1330 | 0.003<br>3 | 0.0661 | 0.002<br>6 | 805 | 19 |
| MAP_3_16 | 3.06 | 23.7 | 18.3 | 1.30 | 1.269 | 0.05<br>3 | 0.1315 | 0.003<br>2 | 0.0691 | 0.002<br>8 | 793 | 19 |
| MAP_3_17 | 3.07 | 23.0 | 18.1 | 1.27 | 1.260 | 0.05<br>1 | 0.1356 | 0.003<br>5 | 0.0663 | 0.002<br>6 | 820 | 21 |
| MAP_3_18 | 3.12 | 23.5 | 18.4 | 1.28 | 1.300 | 0.06<br>2 | 0.1353 | 0.003<br>4 | 0.0682 | 0.002<br>8 | 816 | 20 |
| MAP_3_19 | 3.16 | 24.4 | 18.7 | 1.30 | 1.247 | 0.04<br>8 | 0.1330 | 0.003<br>4 | 0.0674 | 0.002<br>7 | 804 | 20 |
| MAP_3_20 | 3.13 | 23.6 | 18.5 | 1.27 | 1.268 | 0.05<br>3 | 0.1337 | 0.003<br>3 | 0.0676 | 0.002<br>8 | 807 | 19 |

|                                                                                     |      |      |      |      |       |       |        |        |        |        |     |    |
|-------------------------------------------------------------------------------------|------|------|------|------|-------|-------|--------|--------|--------|--------|-----|----|
| MAP_3_21                                                                            | 3.28 | 26.1 | 19.0 | 1.38 | 1.301 | 0.053 | 0.1335 | 0.0034 | 0.0698 | 0.0029 | 804 | 20 |
| MAP_3_22                                                                            | 3.19 | 23.4 | 19.1 | 1.22 | 1.230 | 0.047 | 0.1334 | 0.0034 | 0.0668 | 0.0026 | 807 | 20 |
| MAP_3_23                                                                            | 3.16 | 23.6 | 19.0 | 1.24 | 1.287 | 0.050 | 0.1319 | 0.0035 | 0.0693 | 0.0026 | 795 | 21 |
| MAP_3_24                                                                            | 3.23 | 25.0 | 19.2 | 1.30 | 1.242 | 0.049 | 0.1329 | 0.0035 | 0.0672 | 0.0027 | 803 | 21 |
| MAP_3_25                                                                            | 3.33 | 25.5 | 19.3 | 1.32 | 1.282 | 0.057 | 0.1343 | 0.0033 | 0.0675 | 0.0027 | 811 | 19 |
| MAP_3_26                                                                            | 3.23 | 24.8 | 19.2 | 1.29 | 1.266 | 0.045 | 0.1320 | 0.0033 | 0.0680 | 0.0021 | 797 | 19 |
| MAP_3_27                                                                            | 3.27 | 26.4 | 19.3 | 1.37 | 1.223 | 0.055 | 0.1306 | 0.0034 | 0.0664 | 0.0028 | 790 | 20 |
| MAP_3_28                                                                            | 3.29 | 27.1 | 19.2 | 1.41 | 1.203 | 0.042 | 0.1323 | 0.0033 | 0.0655 | 0.0025 | 801 | 19 |
| MAP_3_29                                                                            | 3.21 | 24.4 | 19.2 | 1.27 | 1.179 | 0.047 | 0.1324 | 0.0032 | 0.0640 | 0.0026 | 803 | 19 |
| MAP_3_30                                                                            | 3.18 | 24.0 | 19.2 | 1.25 | 1.266 | 0.056 | 0.1310 | 0.0032 | 0.0692 | 0.0029 | 790 | 19 |
| Session 4 of LA-Q-ICPMS @ 75 $\mu\text{m}$ , 3 $\text{J}\cdot\text{cm}^{-2}$ , 5 Hz |      |      |      |      |       |       |        |        |        |        |     |    |
| MAP-3 01                                                                            | 3.28 | 26.0 | 20.0 | 1.30 | 1.310 | 0.110 | 0.1293 | 0.0088 | 0.0722 | 0.0063 | 778 | 52 |
| MAP-3 02                                                                            | 3.26 | 26.6 | 19.9 | 1.34 | 1.243 | 0.095 | 0.1291 | 0.0085 | 0.0676 | 0.0051 | 781 | 50 |
| MAP-3 03                                                                            | 3.25 | 25.4 | 20.2 | 1.26 | 1.313 | 0.079 | 0.1269 | 0.0084 | 0.0730 | 0.0047 | 763 | 49 |



---

|          |      |      |      |      |       |           |        |            |        |            |     |    |
|----------|------|------|------|------|-------|-----------|--------|------------|--------|------------|-----|----|
| MAP-3 04 | 3.24 | 25.8 | 20.1 | 1.28 | 1.330 | 0.10<br>0 | 0.1276 | 0.008<br>4 | 0.0735 | 0.006<br>1 | 766 | 49 |
| MAP-3 05 | 3.21 | 25.5 | 20.0 | 1.27 | 1.268 | 0.09<br>3 | 0.1274 | 0.008<br>3 | 0.0703 | 0.005<br>6 | 768 | 49 |
| MAP-3 06 | 3.20 | 24.9 | 20.0 | 1.25 | 1.182 | 0.08<br>9 | 0.1294 | 0.008<br>3 | 0.0646 | 0.005<br>4 | 785 | 49 |
| MAP-3 07 | 3.26 | 25.5 | 19.8 | 1.29 | 1.280 | 0.11<br>0 | 0.1309 | 0.008<br>5 | 0.0688 | 0.005<br>8 | 790 | 50 |
| MAP-3 08 | 3.41 | 29.5 | 20.0 | 1.47 | 1.340 | 0.08<br>3 | 0.1302 | 0.008<br>4 | 0.0722 | 0.004<br>3 | 783 | 49 |
| MAP-3 09 | 3.31 | 27.4 | 20.0 | 1.37 | 1.230 | 0.10<br>0 | 0.1301 | 0.008<br>6 | 0.0640 | 0.004<br>6 | 790 | 51 |
| MAP-3 10 | 3.22 | 25.3 | 19.7 | 1.28 | 1.266 | 0.08<br>3 | 0.1284 | 0.008<br>3 | 0.0703 | 0.005<br>2 | 774 | 49 |
| MAP-3 11 | 3.28 | 26.0 | 19.7 | 1.32 | 1.204 | 0.08<br>3 | 0.1313 | 0.008<br>6 | 0.0656 | 0.005<br>3 | 795 | 51 |
| MAP-3 12 | 3.30 | 25.6 | 19.7 | 1.30 | 1.328 | 0.08<br>4 | 0.1323 | 0.008<br>8 | 0.0698 | 0.004<br>4 | 797 | 52 |
| MAP-3 13 | 3.20 | 24.7 | 19.6 | 1.26 | 1.340 | 0.09<br>8 | 0.1314 | 0.008<br>7 | 0.0715 | 0.005<br>1 | 790 | 51 |
| MAP-3 14 | 3.22 | 23.5 | 18.9 | 1.24 | 1.347 | 0.07<br>0 | 0.1372 | 0.009<br>0 | 0.0700 | 0.004<br>0 | 826 | 53 |
| MAP-3 15 | 3.15 | 24.2 | 19.0 | 1.27 | 1.300 | 0.10<br>0 | 0.1336 | 0.008<br>8 | 0.0686 | 0.005<br>7 | 806 | 52 |
| MAP-3 16 | 3.21 | 25.2 | 19.1 | 1.32 | 1.257 | 0.08<br>0 | 0.1348 | 0.008<br>8 | 0.0664 | 0.004<br>5 | 815 | 52 |
| MAP-3 17 | 3.11 | 24.2 | 18.6 | 1.30 | 1.344 | 0.09<br>1 | 0.1343 | 0.008<br>6 | 0.0704 | 0.005<br>0 | 808 | 50 |

---

|          |      |      |      |      |       |       |        |        |        |        |     |    |
|----------|------|------|------|------|-------|-------|--------|--------|--------|--------|-----|----|
| MAP-3 18 | 3.16 | 24.7 | 18.7 | 1.32 | 1.302 | 0.079 | 0.1338 | 0.0090 | 0.0703 | 0.0056 | 806 | 53 |
| MAP-3 19 | 3.12 | 24.2 | 18.6 | 1.30 | 1.245 | 0.090 | 0.1335 | 0.0086 | 0.0656 | 0.0048 | 808 | 51 |
| MAP-3 20 | 3.00 | 23.4 | 18.1 | 1.29 | 1.286 | 0.082 | 0.1320 | 0.0089 | 0.0678 | 0.0045 | 797 | 52 |
| MAP-3 21 | 3.13 | 24.0 | 18.5 | 1.30 | 1.400 | 0.110 | 0.1340 | 0.0089 | 0.0738 | 0.0060 | 803 | 52 |
| MAP-3 22 | 2.94 | 22.6 | 18.0 | 1.26 | 1.346 | 0.098 | 0.1325 | 0.0088 | 0.0716 | 0.0057 | 797 | 52 |
| MAP-3 23 | 3.20 | 23.3 | 18.4 | 1.27 | 1.328 | 0.093 | 0.1390 | 0.0089 | 0.0667 | 0.0047 | 839 | 52 |
| MAP-3 24 | 3.09 | 23.8 | 18.7 | 1.27 | 1.218 | 0.085 | 0.1325 | 0.0085 | 0.0639 | 0.0045 | 804 | 50 |
| MAP-3 25 | 3.33 | 29.7 | 19.2 | 1.55 | 1.258 | 0.092 | 0.1318 | 0.0087 | 0.0666 | 0.0044 | 797 | 51 |
| MAP-3 26 | 3.17 | 26.0 | 18.8 | 1.39 | 1.320 | 0.100 | 0.1310 | 0.0085 | 0.0691 | 0.0054 | 790 | 50 |
| MAP-3 27 | 3.27 | 29.3 | 19.1 | 1.53 | 1.261 | 0.096 | 0.1311 | 0.0084 | 0.0679 | 0.0057 | 792 | 49 |
| MAP-3 28 | 3.10 | 28.1 | 18.9 | 1.49 | 1.187 | 0.092 | 0.1267 | 0.0083 | 0.0655 | 0.0050 | 768 | 49 |
| MAP-3 29 | 3.33 | 29.4 | 19.4 | 1.51 | 1.333 | 0.083 | 0.1313 | 0.0088 | 0.0721 | 0.0053 | 789 | 51 |
| MAP-3 30 | 3.04 | 22.7 | 18.6 | 1.22 | 1.294 | 0.078 | 0.1328 | 0.0087 | 0.0684 | 0.0042 | 801 | 51 |
| MAP-3 31 | 3.19 | 26.1 | 19.0 | 1.38 | 1.240 | 0.110 | 0.1324 | 0.0087 | 0.0657 | 0.0058 | 802 | 51 |

|          |      |      |      |      |       |           |        |            |        |            |     |    |
|----------|------|------|------|------|-------|-----------|--------|------------|--------|------------|-----|----|
| MAP-3 32 | 2.86 | 21.5 | 17.5 | 1.23 | 1.304 | 0.09<br>1 | 0.1320 | 0.008<br>8 | 0.0694 | 0.005<br>2 | 796 | 52 |
| MAP-3 33 | 2.82 | 21.1 | 17.4 | 1.21 | 1.230 | 0.12<br>0 | 0.1320 | 0.008<br>6 | 0.0661 | 0.006<br>0 | 799 | 51 |
| MAP-3 34 | 2.74 | 20.5 | 16.7 | 1.23 | 1.262 | 0.09<br>8 | 0.1326 | 0.008<br>5 | 0.0666 | 0.005<br>2 | 802 | 50 |
| MAP-3 35 | 2.64 | 21.1 | 16.1 | 1.31 | 1.253 | 0.09<br>6 | 0.1298 | 0.008<br>4 | 0.0677 | 0.005<br>5 | 785 | 49 |
| MAP-3 36 | 2.63 | 21.0 | 16.0 | 1.31 | 1.280 | 0.11<br>0 | 0.1292 | 0.008<br>5 | 0.0686 | 0.005<br>6 | 780 | 50 |
| MAP-3 37 | 2.68 | 21.5 | 16.3 | 1.31 | 1.269 | 0.07<br>6 | 0.1302 | 0.008<br>7 | 0.0677 | 0.004<br>2 | 787 | 51 |
| MAP-3 38 | 2.62 | 22.1 | 16.0 | 1.38 | 1.200 | 0.11<br>0 | 0.1279 | 0.008<br>6 | 0.0668 | 0.006<br>6 | 774 | 51 |
| MAP-3 39 | 2.57 | 21.0 | 15.4 | 1.36 | 1.260 | 0.12<br>0 | 0.1295 | 0.008<br>9 | 0.0673 | 0.006<br>6 | 783 | 52 |
| MAP-3 40 | 2.55 | 21.0 | 15.6 | 1.35 | 1.239 | 0.09<br>9 | 0.1291 | 0.008<br>8 | 0.0676 | 0.005<br>6 | 781 | 52 |

Session 5 of LA-Q-ICPMS @ 50  $\mu\text{m}$ , 2  $\text{J}\cdot\text{cm}^{-2}$ , 5 Hz

|          |      |      |      |      |       |           |        |            |        |            |     |    |
|----------|------|------|------|------|-------|-----------|--------|------------|--------|------------|-----|----|
| MAP-3 01 | 2.80 | 17.4 | 18.8 | 0.93 | 1.264 | 0.02<br>7 | 0.1343 | 0.001<br>7 | 0.0679 | 0.001<br>6 | 811 | 10 |
| MAP-3 02 | 2.35 | 19.2 | 14.6 | 1.31 | 1.265 | 0.04<br>2 | 0.1327 | 0.001<br>7 | 0.0684 | 0.002<br>2 | 801 | 10 |
| MAP-3 03 | 2.38 | 19.2 | 15.2 | 1.26 | 1.252 | 0.03<br>2 | 0.1312 | 0.001<br>7 | 0.0682 | 0.001<br>8 | 792 | 10 |
| MAP-3 04 | 2.41 | 18.8 | 15.3 | 1.23 | 1.320 | 0.04      | 0.1327 | 0.001      | 0.0717 | 0.002      | 798 | 11 |

---

|          |      |      |      |      |       |           |        |                 |        |                 |     |    |
|----------|------|------|------|------|-------|-----------|--------|-----------------|--------|-----------------|-----|----|
| MAP-3 05 | 2.43 | 19.1 | 15.3 | 1.25 | 1.274 | 0.03<br>5 | 0.1336 | 0.001<br>9<br>7 | 0.0687 | 0.002<br>2<br>0 | 806 | 10 |
| MAP-3 06 | 2.55 | 18.9 | 16.3 | 1.16 | 1.283 | 0.03<br>7 | 0.1341 | 0.001<br>9<br>8 | 0.0689 | 0.001<br>9      | 809 | 11 |
| MAP-3 07 | 2.69 | 18.5 | 17.7 | 1.05 | 1.265 | 0.03<br>4 | 0.1337 | 0.001<br>7      | 0.0680 | 0.002<br>0      | 807 | 10 |
| MAP-3 08 | 2.69 | 18.3 | 18.2 | 1.00 | 1.235 | 0.03<br>2 | 0.1314 | 0.001<br>7      | 0.0679 | 0.001<br>8      | 794 | 10 |
| MAP-3 09 | 2.36 | 19.9 | 14.5 | 1.37 | 1.288 | 0.03<br>5 | 0.1333 | 0.001<br>8      | 0.0694 | 0.002<br>0      | 803 | 11 |
| MAP-3 10 | 2.29 | 19.4 | 14.5 | 1.33 | 1.286 | 0.03<br>7 | 0.1299 | 0.001<br>7      | 0.0722 | 0.002<br>2      | 781 | 10 |
| MAP-3 11 | 2.37 | 19.9 | 14.8 | 1.35 | 1.250 | 0.03<br>8 | 0.1323 | 0.001<br>8      | 0.0687 | 0.002<br>3      | 798 | 11 |
| MAP-3 12 | 2.42 | 19.5 | 15.2 | 1.29 | 1.285 | 0.03<br>6 | 0.1333 | 0.001<br>9      | 0.0701 | 0.002<br>1      | 803 | 11 |
| MAP-3 13 | 2.44 | 19.6 | 15.4 | 1.28 | 1.272 | 0.03<br>3 | 0.1329 | 0.001<br>8      | 0.0699 | 0.002<br>0      | 801 | 11 |
| MAP-3 14 | 2.49 | 20.5 | 15.4 | 1.33 | 1.312 | 0.04<br>0 | 0.1335 | 0.001<br>7      | 0.0710 | 0.002<br>1      | 803 | 10 |
| MAP-3 15 | 2.46 | 20.6 | 15.2 | 1.35 | 1.263 | 0.03<br>6 | 0.1341 | 0.001<br>9      | 0.0687 | 0.002<br>1      | 809 | 11 |
| MAP-3 16 | 2.48 | 20.7 | 15.4 | 1.35 | 1.277 | 0.03<br>6 | 0.1331 | 0.001<br>9      | 0.0698 | 0.002<br>0      | 802 | 11 |
| MAP-3 17 | 2.53 | 21.3 | 15.7 | 1.35 | 1.284 | 0.03<br>5 | 0.1331 | 0.001<br>8      | 0.0703 | 0.002<br>1      | 801 | 11 |
| MAP-3 18 | 2.57 | 20.7 | 15.8 | 1.31 | 1.262 | 0.03      | 0.1358 | 0.001           | 0.0676 | 0.002           | 820 | 11 |

|          |      |      |      |      |       |           |        |            |        |            |     |    |
|----------|------|------|------|------|-------|-----------|--------|------------|--------|------------|-----|----|
| MAP-3 19 | 2.56 | 20.3 | 15.8 | 1.28 | 1.269 | 0.04<br>0 | 0.1345 | 0.001<br>9 | 0.0689 | 0.002<br>3 | 811 | 11 |
| MAP-3 20 | 2.52 | 20.6 | 15.7 | 1.31 | 1.283 | 0.03<br>7 | 0.1337 | 0.001<br>7 | 0.0698 | 0.002<br>1 | 805 | 10 |
| MAP-3 21 | 2.54 | 20.6 | 15.8 | 1.30 | 1.281 | 0.04<br>7 | 0.1342 | 0.001<br>8 | 0.0696 | 0.002<br>8 | 809 | 11 |
| MAP-3 22 | 2.70 | 20.3 | 17.3 | 1.18 | 1.273 | 0.03<br>3 | 0.1332 | 0.001<br>9 | 0.0692 | 0.001<br>8 | 803 | 11 |
| MAP-3 23 | 2.70 | 20.6 | 17.4 | 1.18 | 1.258 | 0.03<br>2 | 0.1319 | 0.001<br>8 | 0.0691 | 0.002<br>0 | 796 | 11 |
| MAP-3 24 | 2.68 | 20.9 | 17.1 | 1.22 | 1.271 | 0.03<br>6 | 0.1310 | 0.001<br>8 | 0.0702 | 0.002<br>1 | 789 | 11 |
| MAP-3 25 | 2.88 | 23.9 | 18.4 | 1.30 | 1.212 | 0.03<br>1 | 0.1302 | 0.001<br>6 | 0.0669 | 0.001<br>7 | 788 | 10 |
| MAP-3 26 | 2.86 | 21.9 | 18.2 | 1.20 | 1.259 | 0.03<br>7 | 0.1323 | 0.001<br>7 | 0.0685 | 0.002<br>2 | 798 | 10 |
| MAP-3 27 | 3.07 | 27.6 | 18.8 | 1.47 | 1.227 | 0.03<br>6 | 0.1305 | 0.001<br>7 | 0.0678 | 0.002<br>1 | 789 | 10 |
| MAP-3 28 | 2.98 | 26.3 | 18.6 | 1.42 | 1.232 | 0.03<br>1 | 0.1295 | 0.001<br>7 | 0.0689 | 0.001<br>9 | 782 | 10 |
| MAP-3 29 | 3.16 | 29.2 | 18.8 | 1.55 | 1.285 | 0.03<br>6 | 0.1297 | 0.001<br>8 | 0.0714 | 0.002<br>2 | 781 | 11 |
| MAP-3 30 | 3.27 | 28.4 | 18.6 | 1.52 | 1.566 | 0.04<br>8 | 0.1328 | 0.001<br>8 | 0.0848 | 0.002<br>5 | 786 | 11 |

LA-SF-SC-ICPMS @40  $\mu\text{m}$ , 3 J·cm<sup>-2</sup>, 6 Hz

|          |  |      |      |      |       |      |        |       |        |       |     |    |
|----------|--|------|------|------|-------|------|--------|-------|--------|-------|-----|----|
| MAP-3 01 |  | 21.1 | 17.6 | 1.20 | 1.230 | 0.03 | 0.1284 | 0.002 | 0.0693 | 0.002 | 775 | 16 |
|----------|--|------|------|------|-------|------|--------|-------|--------|-------|-----|----|

---

|          |      |      |           |       |           |        |            |        |            |     |    |
|----------|------|------|-----------|-------|-----------|--------|------------|--------|------------|-----|----|
| MAP-3 02 | 15.6 | 20.6 | 0.75<br>8 | 1.817 | 0.08<br>2 | 0.1378 | 0.002<br>9 | 0.0951 | 0.003<br>8 | 805 | 17 |
| MAP-3 03 | 15.2 | 20.8 | 0.73<br>3 | 1.315 | 0.04<br>5 | 0.1319 | 0.002<br>8 | 0.0720 | 0.002<br>2 | 793 | 16 |
| MAP-3 04 | 15.4 | 20.7 | 0.74<br>4 | 1.254 | 0.04<br>7 | 0.1316 | 0.002<br>8 | 0.0688 | 0.002<br>4 | 794 | 17 |
| MAP-3 05 | 17.1 | 21.1 | 0.81<br>3 | 1.266 | 0.04<br>2 | 0.1319 | 0.002<br>7 | 0.0693 | 0.002<br>0 | 795 | 16 |
| MAP-3 06 | 19.8 | 19.6 | 1.01<br>0 | 1.252 | 0.03<br>5 | 0.1296 | 0.002<br>7 | 0.0698 | 0.001<br>9 | 781 | 16 |
| MAP-3 07 | 14.5 | 20.9 | 0.69<br>5 | 1.294 | 0.04<br>4 | 0.1335 | 0.003<br>1 | 0.0703 | 0.002<br>8 | 804 | 18 |
| MAP-3 08 | 14.6 | 21.3 | 0.68<br>8 | 1.310 | 0.04<br>2 | 0.1333 | 0.002<br>5 | 0.0710 | 0.002<br>3 | 802 | 15 |
| MAP-3 09 | 15.6 | 21.3 | 0.73<br>5 | 1.286 | 0.03<br>8 | 0.1329 | 0.002<br>3 | 0.0700 | 0.002<br>2 | 801 | 14 |
| MAP-3 10 | 15.4 | 22.0 | 0.69<br>9 | 1.304 | 0.03<br>9 | 0.1332 | 0.002<br>9 | 0.0708 | 0.002<br>2 | 802 | 17 |
| MAP-3 11 | 15.4 | 21.8 | 0.70<br>8 | 1.296 | 0.04<br>4 | 0.1342 | 0.003<br>1 | 0.0705 | 0.002<br>5 | 808 | 18 |
| MAP-3 12 | 15.7 | 22.8 | 0.68<br>7 | 1.312 | 0.04<br>1 | 0.1329 | 0.002<br>2 | 0.0715 | 0.002<br>4 | 799 | 13 |
| MAP-3 13 | 15.8 | 21.7 | 0.72<br>9 | 1.256 | 0.03<br>1 | 0.1298 | 0.002<br>8 | 0.0702 | 0.002<br>4 | 782 | 16 |
| MAP-3 14 | 16.0 | 22.7 | 0.70<br>7 | 1.292 | 0.04<br>5 | 0.1327 | 0.002<br>6 | 0.0703 | 0.002<br>3 | 799 | 15 |
| MAP-3 15 | 17.1 | 21.9 | 0.78      | 1.253 | 0.04      | 0.1327 | 0.003      | 0.0685 | 0.002      | 801 | 19 |

---

|          |      |      |           |       |           |        |            |        |            |     |    |
|----------|------|------|-----------|-------|-----------|--------|------------|--------|------------|-----|----|
| MAP-3 16 | 17.4 | 21.6 | 0.80<br>3 | 1.271 | 0.04<br>2 | 0.1314 | 0.002<br>6 | 0.0696 | 0.002<br>2 | 792 | 15 |
| MAP-3 17 | 18.5 | 26.0 | 0.71<br>1 | 1.230 | 0.04<br>3 | 0.1317 | 0.002<br>6 | 0.0674 | 0.002<br>5 | 796 | 15 |
| MAP-3 18 | 18.0 | 24.0 | 0.75<br>2 | 1.297 | 0.04<br>3 | 0.1331 | 0.003<br>2 | 0.0705 | 0.002<br>0 | 801 | 19 |
| MAP-3 19 | 19.4 | 29.9 | 0.65<br>1 | 1.314 | 0.03<br>8 | 0.1325 | 0.002<br>2 | 0.0718 | 0.002<br>1 | 797 | 13 |
| MAP-3 20 | 19.6 | 30.6 | 0.64<br>1 | 1.269 | 0.04<br>0 | 0.1316 | 0.002<br>7 | 0.0698 | 0.002<br>2 | 793 | 16 |
| MAP-3 21 | 20.1 | 30.2 | 0.66<br>4 | 1.234 | 0.03<br>2 | 0.1312 | 0.002<br>3 | 0.0681 | 0.001<br>8 | 792 | 14 |
| MAP-3 22 | 19.4 | 25.5 | 0.76<br>2 | 1.298 | 0.04<br>4 | 0.1358 | 0.002<br>8 | 0.0691 | 0.001<br>9 | 818 | 16 |
| MAP-3 23 | 19.1 | 24.7 | 0.77<br>3 | 1.311 | 0.03<br>8 | 0.1353 | 0.002<br>5 | 0.0702 | 0.001<br>9 | 814 | 15 |
| MAP-3 24 | 19.1 | 24.9 | 0.76<br>9 | 1.398 | 0.04<br>5 | 0.1343 | 0.002<br>4 | 0.0754 | 0.002<br>3 | 804 | 14 |
| MAP-3 25 | 18.9 | 25.1 | 0.75<br>3 | 1.308 | 0.03<br>7 | 0.1348 | 0.002<br>4 | 0.0700 | 0.002<br>0 | 812 | 14 |
| MAP-3 26 | 19.2 | 25.8 | 0.74<br>2 | 1.298 | 0.03<br>9 | 0.1337 | 0.002<br>5 | 0.0703 | 0.002<br>0 | 805 | 15 |
| MAP-3 27 | 19.9 | 27.1 | 0.73<br>5 | 1.328 | 0.03<br>5 | 0.1349 | 0.002<br>6 | 0.0714 | 0.002<br>1 | 811 | 15 |
| MAP-3 28 | 19.4 | 26.1 | 0.74<br>3 | 1.331 | 0.04<br>0 | 0.1354 | 0.003<br>2 | 0.0713 | 0.002<br>1 | 814 | 19 |
| MAP-3 29 | 20.6 | 26.0 | 0.79      | 1.266 | 0.03      | 0.1344 | 0.002      | 0.0682 | 0.001      | 811 | 12 |

|          |      |      |           |       |           |        |            |        |            |     |    |
|----------|------|------|-----------|-------|-----------|--------|------------|--------|------------|-----|----|
| MAP-3 30 | 20.9 | 26.3 | 0.79<br>3 | 1.263 | 0.04<br>3 | 0.1311 | 0.003<br>1 | 0.0698 | 0.002<br>0 | 790 | 18 |
| MAP-3 31 | 20.0 | 26.4 | 0.75<br>8 | 1.307 | 0.03<br>8 | 0.1344 | 0.002<br>4 | 0.0709 | 0.002<br>2 | 808 | 14 |
| MAP-3 32 | 20.4 | 27.5 | 0.74<br>3 | 1.276 | 0.03<br>9 | 0.1343 | 0.002<br>9 | 0.0691 | 0.002<br>3 | 810 | 17 |
| MAP-3 33 | 20.0 | 27.2 | 0.73<br>6 | 1.294 | 0.04<br>1 | 0.1308 | 0.002<br>6 | 0.0718 | 0.002<br>3 | 787 | 15 |
| MAP-3 34 | 21.0 | 31.4 | 0.67<br>0 | 1.275 | 0.03<br>4 | 0.1300 | 0.002<br>8 | 0.0708 | 0.001<br>9 | 783 | 16 |
| MAP-3 35 | 20.9 | 26.7 | 0.78<br>1 | 1.261 | 0.02<br>9 | 0.1339 | 0.002<br>5 | 0.0679 | 0.001<br>5 | 808 | 15 |
| MAP-3 36 | 20.7 | 27.4 | 0.75<br>6 | 1.299 | 0.03<br>8 | 0.1361 | 0.002<br>8 | 0.0694 | 0.002<br>1 | 820 | 16 |
| MAP-3 37 | 21.5 | 28.0 | 0.77<br>0 | 1.267 | 0.03<br>9 | 0.1305 | 0.002<br>8 | 0.0705 | 0.002<br>1 | 786 | 16 |
| MAP-3 38 | 21.4 | 28.2 | 0.75<br>8 | 1.304 | 0.03<br>9 | 0.1347 | 0.002<br>5 | 0.0702 | 0.001<br>8 | 811 | 15 |
| MAP-3 39 | 22.1 | 29.8 | 0.74<br>4 | 1.242 | 0.03<br>4 | 0.1324 | 0.002<br>6 | 0.0682 | 0.001<br>9 | 799 | 15 |
| MAP-3 40 | 21.4 | 28.9 | 0.74<br>0 | 1.279 | 0.04<br>2 | 0.1327 | 0.002<br>3 | 0.0696 | 0.002<br>1 | 800 | 14 |

LA-MC-ICPMS @ 23  $\mu\text{m}$ , 3  $\text{J}\cdot\text{cm}^{-2}$ , 6 Hz

|          |  |  |  |       |           |        |            |        |            |     |    |
|----------|--|--|--|-------|-----------|--------|------------|--------|------------|-----|----|
| MAP-3 01 |  |  |  | 1.291 | 0.02<br>0 | 0.1310 | 0.003<br>6 | 0.0714 | 0.002<br>4 | 788 | 21 |
| MAP-3 02 |  |  |  | 1.261 | 0.02      | 0.1296 | 0.003      | 0.0705 | 0.002      | 781 | 21 |



---

|          |       |                |        |            |        |            |     |    |
|----------|-------|----------------|--------|------------|--------|------------|-----|----|
| MAP-3 03 | 1.270 | 0.02<br>2<br>1 | 0.1310 | 0.003<br>6 | 0.0701 | 0.002<br>3 | 790 | 21 |
| MAP-3 04 | 1.285 | 0.02<br>1      | 0.1327 | 0.003<br>7 | 0.0701 | 0.002<br>3 | 800 | 21 |
| MAP-3 05 | 1.284 | 0.02<br>1      | 0.1334 | 0.003<br>7 | 0.0696 | 0.002<br>3 | 804 | 21 |
| MAP-3 06 | 1.293 | 0.02<br>1      | 0.1335 | 0.003<br>7 | 0.0700 | 0.002<br>3 | 804 | 21 |
| MAP-3 07 | 1.290 | 0.02<br>1      | 0.1341 | 0.003<br>7 | 0.0696 | 0.002<br>3 | 808 | 21 |
| MAP-3 08 | 1.300 | 0.02<br>1      | 0.1351 | 0.003<br>7 | 0.0697 | 0.002<br>3 | 814 | 21 |
| MAP-3 09 | 1.283 | 0.02<br>1      | 0.1358 | 0.003<br>7 | 0.0684 | 0.002<br>3 | 819 | 21 |
| MAP-3 10 | 1.282 | 0.02<br>1      | 0.1364 | 0.003<br>7 | 0.0681 | 0.002<br>3 | 823 | 22 |
| MAP-3 11 | 1.263 | 0.02<br>0      | 0.1349 | 0.003<br>7 | 0.0679 | 0.002<br>3 | 814 | 21 |
| MAP-3 12 | 1.275 | 0.02<br>0      | 0.1355 | 0.003<br>7 | 0.0680 | 0.002<br>3 | 818 | 21 |
| MAP-3 13 | 1.269 | 0.02<br>0      | 0.1345 | 0.003<br>7 | 0.0682 | 0.002<br>2 | 812 | 21 |
| MAP-3 14 | 1.260 | 0.02<br>2      | 0.1337 | 0.003<br>7 | 0.0681 | 0.002<br>3 | 807 | 21 |
| MAP-3 15 | 1.244 | 0.02<br>0      | 0.1321 | 0.003<br>6 | 0.0683 | 0.002<br>3 | 798 | 21 |
| MAP-3 16 | 1.236 | 0.02           | 0.1315 | 0.003      | 0.0681 | 0.002      | 794 | 21 |

---

|          |       |           |        |            |        |            |     |    |
|----------|-------|-----------|--------|------------|--------|------------|-----|----|
| MAP-3 17 | 1.264 | 0.02<br>0 | 0.1335 | 0.003<br>7 | 0.0685 | 0.002<br>3 | 806 | 21 |
| MAP-3 18 | 1.257 | 0.02<br>0 | 0.1324 | 0.003<br>6 | 0.0686 | 0.002<br>3 | 799 | 21 |
| MAP-3 19 | 1.246 | 0.02<br>0 | 0.1315 | 0.003<br>6 | 0.0687 | 0.002<br>3 | 794 | 21 |
| MAP-3 20 | 1.277 | 0.02<br>0 | 0.1345 | 0.003<br>7 | 0.0687 | 0.002<br>3 | 811 | 21 |
| MAP-3 21 | 1.282 | 0.02<br>1 | 0.1336 | 0.003<br>7 | 0.0695 | 0.002<br>3 | 805 | 21 |
| MAP-3 22 | 1.268 | 0.02<br>2 | 0.1332 | 0.003<br>7 | 0.0688 | 0.002<br>3 | 803 | 21 |
| MAP-3 23 | 1.286 | 0.02<br>1 | 0.1334 | 0.003<br>6 | 0.0697 | 0.002<br>3 | 803 | 21 |
| MAP-3 24 | 1.324 | 0.02<br>2 | 0.1355 | 0.003<br>7 | 0.0707 | 0.002<br>3 | 815 | 21 |

---

**Table S6 U–Pb data from apatite reference materials and geological samples, using the MAP-3 apatite as primary calibration reference material**

| Comments                                                    | Composition ( $\mu\text{g}\cdot\text{g}^{-1}$ ) |     |      | Th/<br>U | Ratios                           |       |                                  |        |                                   |        | Age (Ma)                                                            |     |
|-------------------------------------------------------------|-------------------------------------------------|-----|------|----------|----------------------------------|-------|----------------------------------|--------|-----------------------------------|--------|---------------------------------------------------------------------|-----|
|                                                             | Pb                                              | Th  | U    |          | $^{207}\text{Pb}/^{235}\text{U}$ | 2SE   | $^{206}\text{Pb}/^{238}\text{U}$ | 2SE    | $^{207}\text{Pb}/^{206}\text{Pb}$ | 2SE    | $^{207}\text{Pb}$ corrected<br>$^{206}\text{Pb}/^{238}\text{U}$ Age | 2SE |
| LA-Q-ICPMS @ 50 $\mu\text{m}$ , 3 J·cm <sup>-2</sup> , 5 Hz |                                                 |     |      |          |                                  |       |                                  |        |                                   |        |                                                                     |     |
| MAD_1                                                       | 15.0                                            | 627 | 16.6 | 37.7     | 2.154                            | 0.086 | 0.0906                           | 0.0036 | 0.1740                            | 0.0085 | 481                                                                 | 20  |
| MAD_2                                                       | 14.6                                            | 611 | 15.8 | 38.8     | 2.150                            | 0.100 | 0.0887                           | 0.0037 | 0.1780                            | 0.0100 | 469                                                                 | 20  |
| MAD_3                                                       | 15.0                                            | 637 | 16.5 | 38.6     | 1.831                            | 0.095 | 0.0853                           | 0.0035 | 0.1564                            | 0.0080 | 465                                                                 | 19  |
| MAD_4                                                       | 14.1                                            | 599 | 15.2 | 39.4     | 2.115                            | 0.094 | 0.0892                           | 0.0036 | 0.1731                            | 0.0085 | 475                                                                 | 20  |
| MAD_5                                                       | 14.4                                            | 622 | 15.4 | 40.5     | 2.270                            | 0.100 | 0.0894                           | 0.0036 | 0.1852                            | 0.0090 | 467                                                                 | 19  |
| MAD_6                                                       | 14.1                                            | 584 | 14.6 | 40.1     | 2.199                            | 0.094 | 0.0920                           | 0.0039 | 0.1733                            | 0.0080 | 489                                                                 | 21  |
| MAD_7                                                       | 14.6                                            | 611 | 15.5 | 39.4     | 2.360                            | 0.110 | 0.0907                           | 0.0035 | 0.1858                            | 0.0087 | 474                                                                 | 19  |
| MAD_8                                                       | 13.8                                            | 587 | 14.6 | 40.2     | 2.088                            | 0.098 | 0.0918                           | 0.0037 | 0.1660                            | 0.0088 | 493                                                                 | 20  |
| MAD_9                                                       | 14.2                                            | 614 | 15.9 | 38.7     | 2.050                            | 0.110 | 0.0891                           | 0.0038 | 0.1661                            | 0.0092 | 479                                                                 | 21  |
| MAD_10                                                      | 13.2                                            | 568 | 14.2 | 40.1     | 2.144                            | 0.086 | 0.0887                           | 0.0036 | 0.1764                            | 0.0085 | 470                                                                 | 20  |

---

|        |      |     |      |      |       |           |        |            |        |            |     |    |
|--------|------|-----|------|------|-------|-----------|--------|------------|--------|------------|-----|----|
| MAD_11 | 13.8 | 612 | 15.4 | 39.8 | 1.896 | 0.09<br>5 | 0.0868 | 0.003<br>4 | 0.1583 | 0.008<br>4 | 472 | 19 |
| MAD_12 | 14.1 | 612 | 15.3 | 40.1 | 2.142 | 0.09<br>9 | 0.0879 | 0.003<br>3 | 0.1777 | 0.009<br>1 | 465 | 18 |
| MAD_13 | 14.5 | 625 | 15.7 | 39.9 | 2.427 | 0.09<br>3 | 0.0919 | 0.003<br>6 | 0.1928 | 0.008<br>7 | 475 | 19 |
| MAD_14 | 14.5 | 626 | 15.5 | 40.3 | 2.291 | 0.08<br>3 | 0.0912 | 0.003<br>6 | 0.1818 | 0.007<br>0 | 479 | 19 |
| MAD_15 | 14.5 | 632 | 15.8 | 40.0 | 2.209 | 0.09<br>9 | 0.0910 | 0.003<br>7 | 0.1766 | 0.008<br>3 | 481 | 20 |
| MAD_16 | 14.9 | 646 | 15.9 | 40.6 | 2.177 | 0.08<br>9 | 0.0878 | 0.003<br>5 | 0.1806 | 0.007<br>8 | 462 | 19 |
| MAD_17 | 14.9 | 645 | 15.5 | 41.7 | 2.436 | 0.08<br>3 | 0.0924 | 0.003<br>7 | 0.1917 | 0.007<br>3 | 478 | 19 |
| MAD_18 | 15.0 | 652 | 15.5 | 42.2 | 2.300 | 0.10<br>0 | 0.0911 | 0.003<br>8 | 0.1830 | 0.009<br>0 | 478 | 20 |
| MAD_19 | 14.5 | 644 | 15.2 | 42.3 | 2.121 | 0.08<br>5 | 0.0917 | 0.003<br>8 | 0.1670 | 0.007<br>0 | 492 | 21 |
| MAD_20 | 13.9 | 620 | 14.5 | 42.9 | 2.267 | 0.09<br>3 | 0.0912 | 0.003<br>6 | 0.1783 | 0.007<br>7 | 481 | 19 |
| MAD_21 | 14.3 | 641 | 15.1 | 42.6 | 2.210 | 0.11<br>0 | 0.0898 | 0.003<br>6 | 0.1774 | 0.008<br>6 | 475 | 20 |
| MAD_22 | 13.7 | 595 | 14.4 | 41.5 | 2.166 | 0.09<br>8 | 0.0920 | 0.003<br>8 | 0.1760 | 0.010<br>0 | 487 | 21 |
| MAD_23 | 15.0 | 661 | 15.8 | 41.8 | 2.166 | 0.09<br>6 | 0.0905 | 0.003<br>8 | 0.1759 | 0.009<br>6 | 479 | 21 |
| MAD_24 | 14.3 | 645 | 15.3 | 42.2 | 2.170 | 0.11<br>0 | 0.0874 | 0.003<br>5 | 0.1799 | 0.009<br>0 | 461 | 19 |

---

|        |      |     |      |      |       |           |        |            |        |            |     |    |
|--------|------|-----|------|------|-------|-----------|--------|------------|--------|------------|-----|----|
| MAD_25 | 15.2 | 687 | 16.0 | 42.8 | 2.292 | 0.09<br>4 | 0.0903 | 0.003<br>8 | 0.1854 | 0.008<br>4 | 472 | 20 |
| MAD_26 | 13.9 | 626 | 14.6 | 42.9 | 2.563 | 0.09<br>5 | 0.0928 | 0.003<br>7 | 0.2009 | 0.008<br>2 | 474 | 19 |
| MAD_27 | 15.5 | 707 | 16.9 | 42.0 | 2.216 | 0.09<br>6 | 0.0899 | 0.003<br>5 | 0.1797 | 0.008<br>2 | 474 | 19 |
| MAD_28 | 13.6 | 616 | 14.7 | 41.9 | 2.390 | 0.10<br>0 | 0.0899 | 0.003<br>6 | 0.1934 | 0.008<br>6 | 464 | 19 |
| MAD_29 | 14.8 | 697 | 16.3 | 42.7 | 1.822 | 0.08<br>4 | 0.0847 | 0.003<br>4 | 0.1549 | 0.007<br>2 | 463 | 19 |
| MAD_30 | 14.0 | 636 | 15.3 | 41.7 | 2.290 | 0.10<br>0 | 0.0893 | 0.003<br>6 | 0.1862 | 0.008<br>6 | 466 | 19 |
| MAD_31 | 14.3 | 656 | 15.5 | 42.4 | 2.180 | 0.10<br>0 | 0.0863 | 0.003<br>5 | 0.1841 | 0.009<br>6 | 452 | 19 |
| MAD_32 | 13.6 | 630 | 15.0 | 41.9 | 2.112 | 0.09<br>5 | 0.0882 | 0.003<br>4 | 0.1738 | 0.008<br>0 | 469 | 18 |
| MAD_33 | 14.3 | 667 | 15.5 | 43.1 | 2.290 | 0.09<br>8 | 0.0885 | 0.003<br>6 | 0.1877 | 0.008<br>4 | 461 | 19 |
| MAD_34 | 12.1 | 562 | 13.2 | 42.7 | 2.590 | 0.13<br>0 | 0.0928 | 0.004<br>3 | 0.2020 | 0.011<br>0 | 473 | 23 |
| MAD_35 | 13.9 | 656 | 15.1 | 43.4 | 2.013 | 0.09<br>4 | 0.0863 | 0.003<br>3 | 0.1687 | 0.008<br>3 | 462 | 18 |
| MAD_36 | 13.7 | 631 | 14.9 | 42.5 | 2.630 | 0.11<br>0 | 0.0934 | 0.003<br>7 | 0.2031 | 0.008<br>6 | 475 | 19 |
| MAD_37 | 13.8 | 647 | 15.0 | 43.2 | 2.231 | 0.09<br>8 | 0.0893 | 0.003<br>5 | 0.1805 | 0.008<br>4 | 470 | 19 |
| MAD_38 | 13.5 | 614 | 14.3 | 42.9 | 2.600 | 0.10<br>0 | 0.0937 | 0.003<br>8 | 0.2034 | 0.009<br>2 | 477 | 20 |

---

|            |           |     |      |      |       |           |        |            |        |            |     |    |
|------------|-----------|-----|------|------|-------|-----------|--------|------------|--------|------------|-----|----|
| MAD_39     | 13.6      | 644 | 14.6 | 44.1 | 1.964 | 0.09<br>3 | 0.0868 | 0.003<br>6 | 0.1640 | 0.008<br>3 | 468 | 20 |
| MAD_40     | 12.9      | 619 | 14.4 | 43.0 | 1.939 | 0.09<br>9 | 0.0858 | 0.003<br>4 | 0.1631 | 0.008<br>9 | 463 | 19 |
| Durango_1  | 0.38<br>1 | 191 | 10.6 | 18.0 | 0.188 | 0.03<br>6 | 0.0066 | 0.000<br>7 | 0.2400 | 0.056<br>0 | 32  | 4  |
| Durango_2  | 0.37<br>6 | 187 | 10.5 | 17.9 | 0.230 | 0.04<br>9 | 0.0070 | 0.000<br>7 | 0.2770 | 0.075<br>0 | 32  | 5  |
| Durango_3  | 0.38<br>7 | 190 | 10.6 | 18.0 | 0.174 | 0.04<br>1 | 0.0064 | 0.000<br>9 | 0.2440 | 0.060<br>0 | 31  | 5  |
| Durango_4  | 0.38<br>3 | 187 | 10.3 | 18.2 | 0.251 | 0.04<br>9 | 0.0069 | 0.000<br>8 | 0.2720 | 0.058<br>0 | 32  | 5  |
| Durango_5  | 0.36<br>9 | 190 | 10.5 | 18.1 | 0.214 | 0.03<br>8 | 0.0061 | 0.000<br>6 | 0.3100 | 0.071<br>0 | 26  | 4  |
| Durango_6  | 0.37<br>4 | 189 | 10.4 | 18.1 | 0.194 | 0.03<br>3 | 0.0062 | 0.000<br>6 | 0.2600 | 0.049<br>0 | 29  | 4  |
| Durango_7  | 0.37<br>6 | 187 | 10.3 | 18.2 | 0.207 | 0.04<br>2 | 0.0068 | 0.000<br>7 | 0.2600 | 0.063<br>0 | 32  | 5  |
| Durango_8  | 0.39<br>1 | 190 | 10.5 | 18.1 | 0.217 | 0.03<br>4 | 0.0068 | 0.000<br>6 | 0.2900 | 0.063<br>0 | 30  | 4  |
| Durango_9  | 0.39<br>5 | 194 | 10.6 | 18.2 | 0.207 | 0.04<br>1 | 0.0067 | 0.001<br>0 | 0.2650 | 0.067<br>0 | 31  | 6  |
| Durango_10 | 0.33<br>7 | 192 | 10.5 | 18.2 | 0.166 | 0.04<br>9 | 0.0058 | 0.001<br>1 | 0.2670 | 0.087<br>0 | 27  | 7  |
| Durango_11 | 0.40<br>3 | 193 | 10.4 | 18.5 | 0.208 | 0.04<br>0 | 0.0072 | 0.000<br>9 | 0.2680 | 0.069<br>0 | 33  | 6  |
| Durango_12 | 0.40      | 192 | 10.4 | 18.4 | 0.222 | 0.05      | 0.0071 | 0.000      | 0.2400 | 0.072      | 35  | 6  |

---

|            |           |     |      |      |       |           |        |            |        |            |    |   |
|------------|-----------|-----|------|------|-------|-----------|--------|------------|--------|------------|----|---|
| Durango_13 | 0.37<br>4 | 193 | 10.5 | 18.4 | 0.241 | 0.04<br>4 | 0.0069 | 0.000<br>9 | 0.2770 | 0.054<br>0 | 31 | 5 |
| Durango_14 | 0.36<br>3 | 192 | 10.5 | 18.3 | 0.231 | 0.04<br>2 | 0.0064 | 0.000<br>7 | 0.2990 | 0.063<br>0 | 28 | 5 |
| Durango_15 | 0.39<br>3 | 195 | 10.5 | 18.6 | 0.247 | 0.06<br>3 | 0.0071 | 0.001<br>3 | 0.2650 | 0.072<br>0 | 33 | 7 |
| Durango_16 | 0.39<br>6 | 194 | 10.4 | 18.7 | 0.251 | 0.04<br>2 | 0.0071 | 0.000<br>6 | 0.2780 | 0.051<br>0 | 32 | 4 |
| Durango_17 | 0.37<br>3 | 191 | 10.4 | 18.4 | 0.209 | 0.04<br>6 | 0.0073 | 0.000<br>8 | 0.2470 | 0.068<br>0 | 35 | 6 |
| Durango_18 | 0.37<br>9 | 191 | 10.4 | 18.5 | 0.200 | 0.03<br>6 | 0.0071 | 0.000<br>7 | 0.2230 | 0.044<br>0 | 35 | 4 |
| Durango_19 | 0.36<br>8 | 192 | 10.3 | 18.7 | 0.221 | 0.04<br>9 | 0.0072 | 0.001<br>2 | 0.3040 | 0.084<br>0 | 31 | 7 |
| Durango_20 | 0.37<br>6 | 194 | 10.4 | 18.6 | 0.246 | 0.03<br>6 | 0.0067 | 0.000<br>6 | 0.3000 | 0.050<br>0 | 29 | 4 |
| Durango_21 | 0.39<br>1 | 197 | 10.5 | 18.7 | 0.236 | 0.05<br>3 | 0.0069 | 0.001<br>0 | 0.2810 | 0.077<br>0 | 31 | 6 |
| Durango_22 | 0.37<br>6 | 194 | 10.4 | 18.6 | 0.223 | 0.03<br>3 | 0.0064 | 0.000<br>7 | 0.3140 | 0.063<br>0 | 27 | 4 |
| Durango_23 | 0.38<br>6 | 198 | 10.6 | 18.7 | 0.199 | 0.04<br>4 | 0.0072 | 0.000<br>8 | 0.2100 | 0.055<br>0 | 37 | 5 |
| Durango_24 | 0.35<br>9 | 196 | 10.5 | 18.7 | 0.198 | 0.03<br>2 | 0.0059 | 0.000<br>6 | 0.2810 | 0.058<br>0 | 27 | 4 |
| Durango_25 | 0.38<br>4 | 198 | 10.5 | 18.9 | 0.194 | 0.03<br>0 | 0.0068 | 0.000<br>7 | 0.2610 | 0.051<br>0 | 32 | 4 |
| Durango_26 | 0.35      | 198 | 10.5 | 18.8 | 0.200 | 0.03      | 0.0066 | 0.000      | 0.2500 | 0.057      | 31 | 5 |

---

|            |           |     |      |      |       |           |        |            |        |            |    |   |
|------------|-----------|-----|------|------|-------|-----------|--------|------------|--------|------------|----|---|
| Durango_27 | 0.37<br>6 | 200 | 10.7 | 18.7 | 0.200 | 0.03<br>9 | 0.0072 | 0.000<br>7 | 0.2250 | 0.051<br>0 | 36 | 5 |
| Durango_28 | 0.38<br>2 | 199 | 10.5 | 18.8 | 0.222 | 0.03<br>7 | 0.0069 | 0.000<br>7 | 0.2480 | 0.046<br>0 | 33 | 4 |
| Durango_29 | 0.37<br>3 | 197 | 10.5 | 18.8 | 0.177 | 0.04<br>2 | 0.0067 | 0.000<br>9 | 0.2120 | 0.053<br>0 | 34 | 5 |
| Durango_30 | 0.37<br>6 | 200 | 10.7 | 18.7 | 0.235 | 0.03<br>7 | 0.0069 | 0.000<br>7 | 0.2710 | 0.048<br>0 | 32 | 4 |
| Durango_31 | 0.39<br>1 | 199 | 10.7 | 18.7 | 0.222 | 0.03<br>3 | 0.0069 | 0.000<br>7 | 0.2640 | 0.049<br>0 | 32 | 4 |
| Durango_32 | 0.40<br>2 | 199 | 10.4 | 19.0 | 0.237 | 0.05<br>1 | 0.0064 | 0.000<br>8 | 0.3340 | 0.090<br>0 | 26 | 6 |
| Durango_33 | 0.39<br>9 | 201 | 10.6 | 18.9 | 0.243 | 0.04<br>6 | 0.0065 | 0.000<br>8 | 0.2960 | 0.057<br>0 | 29 | 5 |
| Durango_34 | 0.38<br>5 | 200 | 10.5 | 19.1 | 0.229 | 0.04<br>5 | 0.0071 | 0.000<br>7 | 0.2430 | 0.056<br>0 | 34 | 5 |
| Durango_35 | 0.36<br>6 | 201 | 10.5 | 19.1 | 0.222 | 0.04<br>2 | 0.0060 | 0.000<br>7 | 0.3390 | 0.077<br>0 | 24 | 5 |
| Durango_36 | 0.38<br>6 | 200 | 10.5 | 19.1 | 0.208 | 0.03<br>3 | 0.0067 | 0.000<br>7 | 0.2640 | 0.047<br>0 | 31 | 4 |
| Durango_37 | 0.37<br>0 | 198 | 10.5 | 18.9 | 0.191 | 0.04<br>7 | 0.0066 | 0.001<br>1 | 0.2710 | 0.073<br>0 | 30 | 6 |
| Durango_38 | 0.36<br>6 | 200 | 10.4 | 19.2 | 0.190 | 0.03<br>9 | 0.0068 | 0.001<br>0 | 0.2360 | 0.082<br>0 | 33 | 6 |
| Durango_39 | 0.40<br>8 | 205 | 10.7 | 19.2 | 0.192 | 0.06<br>9 | 0.0072 | 0.001<br>1 | 0.2170 | 0.080<br>0 | 36 | 7 |
| Durango_40 | 0.39      | 201 | 10.5 | 19.2 | 0.194 | 0.04      | 0.0067 | 0.001      | 0.2660 | 0.095      | 31 | 7 |



---

|        | 8    |     |      |      |       | 9         |        | 0          |        | 0          |     |    |
|--------|------|-----|------|------|-------|-----------|--------|------------|--------|------------|-----|----|
| 401_1  | 4.35 | 122 | 16.0 | 7.61 | 0.785 | 0.05<br>3 | 0.0898 | 0.003<br>0 | 0.0638 | 0.004<br>4 | 551 | 18 |
| 401_2  | 4.72 | 135 | 16.3 | 8.28 | 0.809 | 0.04<br>9 | 0.0873 | 0.002<br>9 | 0.0677 | 0.004<br>4 | 533 | 18 |
| 401_3  | 4.57 | 130 | 16.1 | 8.10 | 0.853 | 0.05<br>3 | 0.0880 | 0.002<br>9 | 0.0709 | 0.004<br>7 | 536 | 17 |
| 401_4  | 4.55 | 133 | 15.4 | 8.61 | 0.874 | 0.07<br>0 | 0.0873 | 0.002<br>8 | 0.0738 | 0.006<br>0 | 529 | 17 |
| 401_5  | 4.72 | 136 | 16.2 | 8.40 | 0.825 | 0.05<br>9 | 0.0878 | 0.002<br>8 | 0.0690 | 0.005<br>5 | 536 | 17 |
| 401_6  | 3.91 | 107 | 15.3 | 7.02 | 0.865 | 0.06<br>5 | 0.0888 | 0.003<br>1 | 0.0719 | 0.005<br>6 | 540 | 19 |
| 401_7  | 4.81 | 139 | 16.2 | 8.58 | 0.893 | 0.05<br>7 | 0.0905 | 0.003<br>1 | 0.0730 | 0.005<br>1 | 549 | 19 |
| 401_8  | 4.18 | 118 | 16.0 | 7.36 | 0.876 | 0.07<br>3 | 0.0881 | 0.002<br>9 | 0.0723 | 0.006<br>1 | 535 | 18 |
| 401_9  | 4.35 | 123 | 14.9 | 8.28 | 1.210 | 0.13<br>0 | 0.0935 | 0.003<br>5 | 0.0960 | 0.010<br>0 | 551 | 21 |
| 401_10 | 4.18 | 116 | 16.2 | 7.15 | 0.747 | 0.05<br>0 | 0.0873 | 0.003<br>2 | 0.0627 | 0.004<br>6 | 537 | 19 |
| 401_11 | 3.96 | 105 | 15.0 | 7.02 | 1.121 | 0.08<br>6 | 0.0907 | 0.003<br>1 | 0.0897 | 0.006<br>5 | 539 | 19 |
| 401_12 | 4.30 | 123 | 16.3 | 7.56 | 0.774 | 0.05<br>9 | 0.0873 | 0.002<br>7 | 0.0640 | 0.005<br>0 | 536 | 16 |
| 401_13 | 4.22 | 120 | 16.3 | 7.37 | 0.734 | 0.05<br>5 | 0.0876 | 0.003<br>0 | 0.0612 | 0.004<br>7 | 539 | 18 |

---

|        |      |     |      |      |       |       |        |        |        |        |     |    |
|--------|------|-----|------|------|-------|-------|--------|--------|--------|--------|-----|----|
| 401_14 | 4.44 | 130 | 16.5 | 7.85 | 0.794 | 0.047 | 0.0851 | 0.0029 | 0.0681 | 0.0044 | 520 | 18 |
| 401_15 | 4.14 | 117 | 16.3 | 7.20 | 0.803 | 0.059 | 0.0870 | 0.0027 | 0.0672 | 0.0051 | 532 | 16 |
| 401_16 | 4.46 | 129 | 16.4 | 7.85 | 0.770 | 0.058 | 0.0886 | 0.0030 | 0.0635 | 0.0050 | 544 | 18 |
| 401_17 | 4.34 | 126 | 16.4 | 7.70 | 0.748 | 0.054 | 0.0885 | 0.0028 | 0.0614 | 0.0045 | 545 | 17 |
| 401_18 | 4.40 | 131 | 16.5 | 7.95 | 0.735 | 0.064 | 0.0858 | 0.0029 | 0.0622 | 0.0054 | 528 | 18 |
| 401_19 | 4.49 | 132 | 16.7 | 7.88 | 0.799 | 0.060 | 0.0871 | 0.0029 | 0.0671 | 0.0052 | 533 | 18 |
| 401_20 | 4.49 | 132 | 16.5 | 8.00 | 0.822 | 0.057 | 0.0877 | 0.0027 | 0.0691 | 0.0051 | 535 | 16 |
| 401_21 | 4.51 | 132 | 16.6 | 7.99 | 0.821 | 0.072 | 0.0882 | 0.0031 | 0.0684 | 0.0064 | 538 | 19 |
| 401_22 | 4.39 | 131 | 16.4 | 8.01 | 0.720 | 0.060 | 0.0862 | 0.0028 | 0.0609 | 0.0052 | 531 | 17 |
| 401_23 | 4.49 | 132 | 16.6 | 7.94 | 0.798 | 0.057 | 0.0867 | 0.0030 | 0.0673 | 0.0051 | 530 | 18 |
| 401_24 | 4.33 | 129 | 16.4 | 7.84 | 0.804 | 0.056 | 0.0870 | 0.0028 | 0.0669 | 0.0048 | 532 | 17 |
| 401_25 | 4.49 | 135 | 16.6 | 8.13 | 0.787 | 0.056 | 0.0872 | 0.0033 | 0.0667 | 0.0053 | 533 | 20 |
| 401_26 | 4.26 | 129 | 16.3 | 7.89 | 0.743 | 0.057 | 0.0855 | 0.0028 | 0.0636 | 0.0054 | 525 | 17 |
| 401_27 | 4.46 | 133 | 16.5 | 8.06 | 0.781 | 0.054 | 0.0882 | 0.0029 | 0.0640 | 0.0044 | 541 | 18 |

---

|        |      |      |      |      |       |           |        |            |        |            |     |    |
|--------|------|------|------|------|-------|-----------|--------|------------|--------|------------|-----|----|
| 401_28 | 4.60 | 132  | 16.4 | 8.05 | 0.795 | 0.05<br>9 | 0.0905 | 0.003<br>1 | 0.0645 | 0.004<br>9 | 555 | 19 |
| 401_29 | 4.47 | 130  | 16.6 | 7.84 | 0.788 | 0.04<br>8 | 0.0880 | 0.003<br>1 | 0.0660 | 0.004<br>5 | 539 | 19 |
| 401_30 | 4.38 | 133  | 16.5 | 8.10 | 0.774 | 0.05<br>3 | 0.0877 | 0.003<br>0 | 0.0642 | 0.004<br>4 | 538 | 18 |
| 401_31 | 4.28 | 130  | 16.4 | 7.89 | 0.816 | 0.05<br>6 | 0.0859 | 0.002<br>9 | 0.0695 | 0.005<br>0 | 524 | 18 |
| 401_32 | 4.41 | 135  | 16.4 | 8.21 | 0.829 | 0.05<br>5 | 0.0858 | 0.003<br>0 | 0.0715 | 0.005<br>3 | 522 | 18 |
| 401_33 | 4.36 | 134  | 16.4 | 8.13 | 0.815 | 0.05<br>4 | 0.0861 | 0.002<br>8 | 0.0694 | 0.005<br>1 | 525 | 17 |
| 401_34 | 4.39 | 134  | 16.4 | 8.16 | 0.808 | 0.05<br>4 | 0.0864 | 0.002<br>9 | 0.0681 | 0.004<br>7 | 528 | 18 |
| 401_35 | 4.36 | 134  | 16.4 | 8.19 | 0.843 | 0.05<br>6 | 0.0851 | 0.002<br>9 | 0.0721 | 0.004<br>8 | 518 | 17 |
| 401_36 | 4.39 | 135  | 16.4 | 8.22 | 0.798 | 0.06<br>7 | 0.0866 | 0.002<br>9 | 0.0675 | 0.006<br>0 | 529 | 18 |
| 401_37 | 4.36 | 136  | 16.4 | 8.30 | 0.776 | 0.04<br>9 | 0.0858 | 0.003<br>1 | 0.0661 | 0.004<br>2 | 526 | 19 |
| 401_38 | 4.36 | 137  | 16.5 | 8.31 | 0.777 | 0.04<br>9 | 0.0839 | 0.002<br>8 | 0.0686 | 0.004<br>9 | 513 | 17 |
| 401_39 | 4.55 | 137  | 16.7 | 8.24 | 0.784 | 0.06<br>1 | 0.0886 | 0.003<br>0 | 0.0639 | 0.005<br>0 | 544 | 18 |
| 401_40 | 4.37 | 138  | 16.5 | 8.37 | 0.846 | 0.06<br>1 | 0.0848 | 0.002<br>9 | 0.0731 | 0.005<br>5 | 515 | 18 |
| Sume_1 | 52.8 | 1957 | 44.0 | 44.5 | 1.756 | 0.05      | 0.1019 | 0.001      | 0.1243 | 0.004      | 558 | 12 |

---

|         |      |      |      |      |       |           |        |            |        |            |     |    |
|---------|------|------|------|------|-------|-----------|--------|------------|--------|------------|-----|----|
| Sume_2  | 54.5 | 1979 | 43.1 | 45.9 | 1.921 | 0.05<br>5 | 0.1041 | 0.002<br>1 | 0.1339 | 0.003<br>9 | 559 | 13 |
| Sume_3  | 52.1 | 1939 | 44.4 | 43.7 | 1.605 | 0.05<br>3 | 0.1005 | 0.001<br>8 | 0.1158 | 0.004<br>0 | 559 | 11 |
| Sume_4  | 54.4 | 2036 | 52.2 | 39.0 | 1.538 | 0.06<br>8 | 0.0983 | 0.002<br>4 | 0.1122 | 0.005<br>6 | 551 | 15 |
| Sume_5  | 63.1 | 2295 | 51.5 | 44.6 | 1.946 | 0.06<br>7 | 0.1042 | 0.001<br>9 | 0.1350 | 0.004<br>2 | 558 | 12 |
| Sume_6  | 57.5 | 2051 | 44.0 | 46.6 | 2.141 | 0.05<br>9 | 0.1072 | 0.001<br>9 | 0.1443 | 0.004<br>2 | 564 | 13 |
| Sume_7  | 59.8 | 2165 | 44.9 | 48.3 | 1.977 | 0.05<br>2 | 0.1059 | 0.002<br>0 | 0.1355 | 0.004<br>1 | 567 | 13 |
| Sume_8  | 61.7 | 2304 | 48.6 | 47.4 | 1.840 | 0.05<br>2 | 0.1031 | 0.001<br>9 | 0.1300 | 0.004<br>1 | 558 | 12 |
| Sume_9  | 65.6 | 2443 | 54.8 | 44.6 | 1.593 | 0.03<br>7 | 0.1017 | 0.001<br>8 | 0.1128 | 0.002<br>7 | 569 | 11 |
| Sume_10 | 60.1 | 2193 | 46.8 | 46.9 | 2.377 | 0.06<br>5 | 0.1097 | 0.001<br>9 | 0.1577 | 0.004<br>8 | 561 | 13 |
| Sume_11 | 55.5 | 2069 | 42.3 | 48.9 | 1.918 | 0.04<br>9 | 0.1043 | 0.002<br>0 | 0.1333 | 0.003<br>7 | 561 | 13 |
| Sume_12 | 63.7 | 2424 | 52.8 | 45.9 | 1.761 | 0.04<br>3 | 0.1015 | 0.001<br>7 | 0.1258 | 0.003<br>5 | 554 | 11 |
| Sume_13 | 56.8 | 2144 | 46.1 | 46.5 | 1.831 | 0.05<br>8 | 0.1044 | 0.001<br>9 | 0.1271 | 0.004<br>1 | 568 | 12 |
| Sume_14 | 54.7 | 2064 | 42.8 | 48.2 | 1.988 | 0.06<br>7 | 0.1058 | 0.001<br>9 | 0.1361 | 0.004<br>7 | 566 | 13 |
| Sume_15 | 64.0 | 2341 | 52.5 | 44.6 | 2.396 | 0.05      | 0.1104 | 0.002      | 0.1578 | 0.003      | 565 | 14 |

---

|         |      |      |      |      |       |           |        |            |        |            |     |    |
|---------|------|------|------|------|-------|-----------|--------|------------|--------|------------|-----|----|
| Sume_16 | 63.7 | 2330 | 54.9 | 42.5 | 2.195 | 0.05<br>4 | 0.1107 | 0.001<br>9 | 0.1444 | 0.004<br>1 | 582 | 13 |
| Sume_17 | 58.7 | 2269 | 52.9 | 42.9 | 1.999 | 0.04<br>8 | 0.1065 | 0.001<br>8 | 0.1360 | 0.003<br>5 | 569 | 12 |
| Sume_18 | 65.5 | 2433 | 61.1 | 39.9 | 2.650 | 0.05<br>4 | 0.1125 | 0.002<br>0 | 0.1697 | 0.003<br>9 | 561 | 14 |
| Sume_19 | 66.1 | 2475 | 67.3 | 36.8 | 2.250 | 0.04<br>7 | 0.1086 | 0.001<br>8 | 0.1502 | 0.003<br>5 | 564 | 12 |
| Sume_20 | 62.4 | 2337 | 58.3 | 40.1 | 2.647 | 0.05<br>9 | 0.1121 | 0.002<br>1 | 0.1704 | 0.004<br>0 | 558 | 14 |
| Sume_21 | 63.2 | 2336 | 60.1 | 38.9 | 2.676 | 0.05<br>9 | 0.1141 | 0.002<br>1 | 0.1698 | 0.003<br>8 | 569 | 14 |
| Sume_22 | 64.5 | 2450 | 63.6 | 38.6 | 2.411 | 0.05<br>5 | 0.1105 | 0.001<br>8 | 0.1565 | 0.003<br>2 | 567 | 12 |
| Sume_23 | 61.7 | 2357 | 59.1 | 39.9 | 2.373 | 0.05<br>8 | 0.1110 | 0.001<br>9 | 0.1548 | 0.004<br>0 | 571 | 13 |
| Sume_24 | 62.3 | 2340 | 54.7 | 42.8 | 2.860 | 0.07<br>4 | 0.1156 | 0.002<br>2 | 0.1794 | 0.004<br>7 | 565 | 15 |
| Sume_25 | 62.4 | 2354 | 59.8 | 39.4 | 3.149 | 0.06<br>5 | 0.1173 | 0.002<br>0 | 0.1941 | 0.003<br>8 | 555 | 15 |
| Sume_26 | 66.4 | 2491 | 61.9 | 40.2 | 3.045 | 0.05<br>2 | 0.1167 | 0.002<br>0 | 0.1882 | 0.003<br>3 | 559 | 15 |
| Sume_27 | 67.0 | 2511 | 64.4 | 39.0 | 3.121 | 0.05<br>9 | 0.1177 | 0.002<br>0 | 0.1919 | 0.003<br>6 | 559 | 15 |
| Sume_28 | 61.3 | 2364 | 62.5 | 37.8 | 2.460 | 0.05<br>7 | 0.1071 | 0.002<br>0 | 0.1663 | 0.003<br>7 | 539 | 13 |
| Sume_29 | 62.7 | 2446 | 61.6 | 39.7 | 2.357 | 0.05      | 0.1090 | 0.001      | 0.1570 | 0.003      | 559 | 12 |

---

|            |      |      |      |      |       |           |        |            |        |            |     |    |
|------------|------|------|------|------|-------|-----------|--------|------------|--------|------------|-----|----|
| Sume_30    | 58.2 | 2309 | 55.4 | 41.7 | 1.973 | 0.05<br>4 | 0.1050 | 0.001<br>8 | 0.1359 | 0.004<br>0 | 562 | 12 |
| Sume_31    | 60.3 | 2330 | 57.6 | 40.4 | 2.760 | 0.06<br>4 | 0.1140 | 0.002<br>2 | 0.1743 | 0.003<br>7 | 563 | 15 |
| Sume_32    | 59.9 | 2315 | 54.1 | 42.8 | 2.736 | 0.05<br>3 | 0.1120 | 0.002<br>0 | 0.1769 | 0.003<br>8 | 550 | 14 |
| Sume_33    | 62.3 | 2430 | 57.2 | 42.5 | 2.282 | 0.05<br>1 | 0.1096 | 0.001<br>9 | 0.1505 | 0.003<br>8 | 569 | 13 |
| Sume_34    | 61.8 | 2384 | 54.5 | 43.7 | 2.108 | 0.05<br>7 | 0.1079 | 0.002<br>0 | 0.1413 | 0.004<br>2 | 571 | 13 |
| Sume_35    | 69.1 | 2684 | 64.8 | 41.4 | 2.275 | 0.04<br>8 | 0.1068 | 0.001<br>7 | 0.1541 | 0.003<br>2 | 551 | 12 |
| Sume_36    | 67.0 | 2578 | 62.6 | 41.2 | 2.463 | 0.05<br>6 | 0.1103 | 0.001<br>9 | 0.1622 | 0.003<br>9 | 559 | 13 |
| Sume_37    | 65.8 | 2433 | 59.7 | 40.8 | 2.582 | 0.05<br>9 | 0.1139 | 0.002<br>0 | 0.1648 | 0.003<br>8 | 574 | 14 |
| Sume_38    | 63.9 | 2403 | 61.4 | 39.1 | 2.295 | 0.05<br>6 | 0.1078 | 0.001<br>8 | 0.1539 | 0.003<br>6 | 556 | 12 |
| Sume_39    | 61.4 | 2337 | 58.2 | 40.2 | 1.906 | 0.03<br>9 | 0.1059 | 0.001<br>9 | 0.1305 | 0.003<br>1 | 572 | 12 |
| Sume_40    | 64.2 | 2501 | 59.5 | 42.1 | 1.539 | 0.04<br>6 | 0.1011 | 0.001<br>7 | 0.1100 | 0.003<br>4 | 569 | 11 |
| YW282-4 01 | 5.57 | 313  | 35.5 | 8.83 | 1.983 | 0.06<br>8 | 0.0415 | 0.001<br>7 | 0.3470 | 0.014<br>0 | 175 | 9  |
| YW282-4 02 | 5.12 | 277  | 32.0 | 8.66 | 2.062 | 0.06<br>7 | 0.0430 | 0.001<br>8 | 0.3560 | 0.016<br>0 | 179 | 9  |

---

|            |      |     |      |      |        |           |        |            |        |            |     |         |
|------------|------|-----|------|------|--------|-----------|--------|------------|--------|------------|-----|---------|
| YW282-4 03 | 5.58 | 316 | 35.6 | 8.89 | 1.859  | 0.06<br>3 | 0.0418 | 0.001<br>8 | 0.3270 | 0.012<br>0 | 182 | 9       |
| YW282-4 04 | 3.18 | 137 | 15.0 | 9.13 | 3.560  | 0.14<br>0 | 0.0543 | 0.002<br>5 | 0.4770 | 0.018<br>0 | 178 | 11      |
| YW282-4 05 | 1.88 | 0   | 1.2  | 0.28 | 48.600 | 2.30<br>0 | 0.4100 | 0.025<br>0 | 0.8850 | 0.048<br>0 | 145 | 15<br>3 |
| YW282-4 06 | 1.06 | 2   | 1.9  | 1.15 | 16.500 | 0.85<br>0 | 0.1542 | 0.009<br>7 | 0.8190 | 0.058<br>0 | 128 | 68      |
| YW282-4 07 | 6.07 | 326 | 36.2 | 9.01 | 1.977  | 0.09<br>7 | 0.0429 | 0.001<br>8 | 0.3310 | 0.014<br>0 | 186 | 9       |
| YW282-4 08 | 4.98 | 213 | 26.7 | 7.98 | 3.180  | 0.11<br>0 | 0.0522 | 0.002<br>2 | 0.4470 | 0.017<br>0 | 183 | 11      |
| YW282-4 09 | 1.28 | 14  | 4.3  | 3.26 | 7.710  | 0.40<br>0 | 0.0920 | 0.005<br>2 | 0.6310 | 0.044<br>0 | 200 | 32      |
| YW282-4 10 | 5.58 | 332 | 35.8 | 9.27 | 1.876  | 0.07<br>2 | 0.0404 | 0.001<br>8 | 0.3400 | 0.014<br>0 | 173 | 9       |
| YW282-4 11 | 5.60 | 228 | 27.6 | 8.26 | 3.160  | 0.13<br>0 | 0.0553 | 0.002<br>5 | 0.4180 | 0.016<br>0 | 205 | 12      |
| YW282-4 12 | 3.13 | 128 | 14.2 | 9.00 | 3.820  | 0.12<br>0 | 0.0578 | 0.002<br>5 | 0.4920 | 0.023<br>0 | 184 | 13      |
| YW282-4 13 | 5.68 | 307 | 34.2 | 8.98 | 2.031  | 0.07<br>9 | 0.0439 | 0.001<br>7 | 0.3360 | 0.014<br>0 | 189 | 9       |
| YW282-4 14 | 5.10 | 259 | 28.4 | 9.13 | 2.337  | 0.09<br>0 | 0.0461 | 0.001<br>9 | 0.3680 | 0.015<br>0 | 187 | 9       |
| YW282-4 15 | 5.44 | 276 | 31.5 | 8.76 | 2.201  | 0.09<br>2 | 0.0443 | 0.001<br>7 | 0.3630 | 0.018<br>0 | 182 | 9       |
| YW282-4 16 | 2.12 | 0   | 0.9  | 0.32 | 72.300 | 4.00<br>0 | 0.6030 | 0.041<br>0 | 0.9030 | 0.046<br>0 | 135 | 21<br>9 |

---

|            |      |      |      |      |        |           |        |            |        |            |                |               |
|------------|------|------|------|------|--------|-----------|--------|------------|--------|------------|----------------|---------------|
| YW282-4 17 | 6.08 | 257  | 31.1 | 8.28 | 2.979  | 0.09<br>2 | 0.0494 | 0.002<br>0 | 0.4420 | 0.017<br>0 | 175            | 10            |
| YW282-4 18 | 3.51 | 149  | 16.0 | 9.31 | 3.550  | 0.15<br>0 | 0.0541 | 0.002<br>3 | 0.4850 | 0.025<br>0 | 175            | 13            |
| YW282-4 19 | 5.31 | 297  | 33.8 | 8.78 | 1.782  | 0.05<br>9 | 0.0403 | 0.001<br>7 | 0.3270 | 0.013<br>0 | 176            | 8             |
| YW282-4 20 | 3.02 | 113  | 13.8 | 8.17 | 3.800  | 0.19<br>0 | 0.0578 | 0.003<br>5 | 0.4820 | 0.024<br>0 | 188            | 16            |
| YW282-4 21 | 4.41 | 228  | 26.4 | 8.64 | 2.269  | 0.09<br>2 | 0.0442 | 0.002<br>0 | 0.3700 | 0.016<br>0 | 179            | 10            |
| YW282-4 22 | 3.03 | 149  | 16.0 | 9.31 | 3.070  | 0.13<br>0 | 0.0505 | 0.002<br>3 | 0.4450 | 0.022<br>0 | 178            | 12            |
| YW282-4 23 | 3.76 | 192  | 22.4 | 8.58 | 2.174  | 0.09<br>3 | 0.0443 | 0.001<br>9 | 0.3580 | 0.018<br>0 | 183            | 10            |
| YW282-4 24 | 1.29 | 0.47 | 1.7  | 0.27 | 22.800 | 1.50<br>0 | 0.2110 | 0.016<br>0 | 0.8110 | 0.056<br>0 | <del>186</del> | <del>90</del> |
| YW282-4 25 | 1.51 | 9    | 6.3  | 1.42 | 6.020  | 0.30<br>0 | 0.0768 | 0.004<br>5 | 0.5800 | 0.031<br>0 | 195            | 22            |
| YW282-4 26 | 3.16 | 126  | 15.4 | 8.22 | 3.400  | 0.16<br>0 | 0.0547 | 0.002<br>6 | 0.4580 | 0.023<br>0 | 187            | 13            |
| YW282-4 27 | 5.63 | 300  | 33.6 | 8.92 | 1.987  | 0.09<br>5 | 0.0446 | 0.002<br>5 | 0.3330 | 0.015<br>0 | 193            | 12            |
| YW282-4 28 | 3.51 | 135  | 14.7 | 9.15 | 3.950  | 0.15<br>0 | 0.0605 | 0.002<br>7 | 0.4810 | 0.022<br>0 | 197            | 14            |
| YW282-4 29 | 4.56 | 213  | 27.4 | 7.76 | 2.500  | 0.16<br>0 | 0.0484 | 0.002<br>4 | 0.3830 | 0.022<br>0 | 192            | 12            |
| YW282-4 30 | 2.51 | 36   | 8.4  | 4.28 | 6.840  | 0.29<br>0 | 0.0861 | 0.004<br>2 | 0.5800 | 0.025<br>0 | 219            | 20            |



|                 |           |       |       |      |       |           |        |            |        |            |     |    |
|-----------------|-----------|-------|-------|------|-------|-----------|--------|------------|--------|------------|-----|----|
| YW282-4 31      | 2.23      | 16    | 9.6   | 1.62 | 5.710 | 0.21<br>0 | 0.0724 | 0.003<br>6 | 0.5800 | 0.026<br>0 | 391 | 19 |
| SG178_01_1      | 0.48<br>6 | 36.08 | 8.77  | 4.11 | 0.554 | 0.08<br>1 | 0.0221 | 0.001<br>5 | 0.1880 | 0.024<br>0 | 117 | 9  |
| SG178_01_2      | 0.37<br>3 | 28.80 | 6.88  | 4.19 | 0.491 | 0.06<br>0 | 0.0212 | 0.001<br>4 | 0.1800 | 0.026<br>0 | 114 | 9  |
| SG178_01_3      | 0.17<br>8 | 8.90  | 3.34  | 2.67 | 0.750 | 0.15<br>0 | 0.0262 | 0.003<br>5 | 0.2310 | 0.052<br>0 | 130 | 21 |
| SG178_01_4      | 0.67<br>9 | 59.97 | 13.66 | 4.39 | 0.327 | 0.03<br>8 | 0.0222 | 0.001<br>2 | 0.1120 | 0.014<br>0 | 131 | 8  |
| SG178_01_5      | 0.45<br>1 | 35.04 | 9.10  | 3.85 | 0.482 | 0.08<br>7 | 0.0217 | 0.001<br>8 | 0.1650 | 0.031<br>0 | 119 | 11 |
| SG178_01_6      | 0.38<br>3 | 28.11 | 8.14  | 3.45 | 0.469 | 0.05<br>4 | 0.0215 | 0.001<br>5 | 0.1690 | 0.022<br>0 | 117 | 9  |
| SG178_01_7      | 0.22<br>1 | 13.48 | 4.28  | 3.15 | 0.537 | 0.06<br>8 | 0.0253 | 0.002<br>2 | 0.1740 | 0.026<br>0 | 137 | 13 |
| SG178_01_8      | 0.37<br>9 | 32.04 | 7.41  | 4.32 | 0.416 | 0.06<br>3 | 0.0204 | 0.001<br>7 | 0.1580 | 0.025<br>0 | 113 | 10 |
| SG178_01_9      | 0.77<br>2 | 65.45 | 14.66 | 4.46 | 0.365 | 0.03<br>6 | 0.0214 | 0.001<br>0 | 0.1250 | 0.013<br>0 | 124 | 6  |
| SG178_01_1<br>0 | 0.40<br>1 | 30.74 | 7.67  | 4.01 | 0.488 | 0.06<br>6 | 0.0227 | 0.001<br>8 | 0.1700 | 0.028<br>0 | 124 | 11 |
| SG178_01_1<br>1 | 0.57<br>9 | 48.74 | 10.57 | 4.61 | 0.480 | 0.05<br>7 | 0.0216 | 0.001<br>2 | 0.1660 | 0.021<br>0 | 118 | 8  |
| SG178_01_1<br>2 | 0.50<br>3 | 41.45 | 9.82  | 4.22 | 0.419 | 0.05<br>4 | 0.0220 | 0.001<br>4 | 0.1430 | 0.019<br>0 | 124 | 9  |
| SG178_01_1      | 0.45      | 34.66 | 9.23  | 3.76 | 0.399 | 0.05      | 0.0232 | 0.001      | 0.1280 | 0.017      | 134 | 9  |

|            |      |       |       |      |       |      |        |       |        |       |     |    |
|------------|------|-------|-------|------|-------|------|--------|-------|--------|-------|-----|----|
| 3          | 9    |       |       |      |       | 0    |        | 4     |        | 0     |     |    |
| SG178_01_1 | 0.41 | 32.96 | 7.35  | 4.48 | 0.588 | 0.06 | 0.0223 | 0.001 | 0.2060 | 0.027 | 115 | 10 |
| 4          | 9    |       |       |      |       | 0    |        | 6     |        | 0     |     |    |
| SG178_01_1 | 0.20 | 9.77  | 3.28  | 2.98 | 0.950 | 0.15 | 0.0257 | 0.003 | 0.2950 | 0.057 | 115 | 18 |
| 5          | 3    |       |       |      |       | 0    |        | 0     |        | 0     |     |    |
| SG178_01_1 | 0.20 | 6.39  | 2.37  | 2.70 | 1.780 | 0.21 | 0.0343 | 0.003 | 0.4380 | 0.064 | 115 | 24 |
| 6          | 2    |       |       |      |       | 0    |        | 3     |        | 0     |     |    |
| SG178_01_1 | 0.69 | 52.21 | 12.87 | 4.06 | 0.529 | 0.05 | 0.0224 | 0.001 | 0.1780 | 0.021 | 120 | 7  |
| 7          | 0    |       |       |      |       | 4    |        | 1     |        | 0     |     |    |
| SG178_01_1 | 0.55 | 46.53 | 11.23 | 4.14 | 0.417 | 0.03 | 0.0210 | 0.001 | 0.1500 | 0.015 | 118 | 7  |
| 8          | 0    |       |       |      |       | 9    |        | 2     |        | 0     |     |    |
| SG178_01_1 | 0.35 | 26.01 | 6.69  | 3.89 | 0.599 | 0.07 | 0.0223 | 0.001 | 0.2090 | 0.031 | 115 | 10 |
| 9          | 4    |       |       |      |       | 9    |        | 6     |        | 0     |     |    |
| SG178_01_2 | 0.41 | 34.11 | 7.47  | 4.57 | 0.561 | 0.06 | 0.0220 | 0.001 | 0.2110 | 0.034 | 113 | 11 |
| 0          | 1    |       |       |      |       | 5    |        | 8     |        | 0     |     |    |
| SG178_01_2 | 0.20 | 6.36  | 2.44  | 2.60 | 1.770 | 0.22 | 0.0330 | 0.002 | 0.4090 | 0.055 | 118 | 21 |
| 1          | 7    |       |       |      |       | 0    |        | 9     |        | 0     |     |    |
| SG178_01_2 | 0.32 | 23.54 | 6.42  | 3.67 | 0.544 | 0.07 | 0.0230 | 0.001 | 0.1890 | 0.031 | 122 | 10 |
| 2          | 6    |       |       |      |       | 0    |        | 6     |        | 0     |     |    |
| SG178_01_2 | 0.54 | 44.23 | 10.76 | 4.11 | 0.434 | 0.05 | 0.0227 | 0.001 | 0.1420 | 0.018 | 128 | 8  |
| 3          | 2    |       |       |      |       | 2    |        | 3     |        | 0     |     |    |
| SG178_01_2 | 0.40 | 31.61 | 8.15  | 3.88 | 0.481 | 0.05 | 0.0234 | 0.001 | 0.1540 | 0.019 | 130 | 10 |
| 4          | 8    |       |       |      |       | 8    |        | 6     |        | 0     |     |    |
| SG178_01_2 | 0.29 | 21.08 | 5.74  | 3.67 | 0.674 | 0.09 | 0.0240 | 0.001 | 0.2170 | 0.035 | 122 | 11 |
| 5          | 8    |       |       |      |       | 0    |        | 7     |        | 0     |     |    |
| SG178_01_2 | 0.44 | 38.53 | 8.14  | 4.74 | 0.541 | 0.06 | 0.0230 | 0.001 | 0.1830 | 0.024 | 123 | 10 |
| 6          | 1    |       |       |      |       | 4    |        | 7     |        | 0     |     |    |
| SG178_01_2 | 0.39 | 34.83 | 7.93  | 4.39 | 0.474 | 0.06 | 0.0237 | 0.001 | 0.1540 | 0.023 | 132 | 11 |

|            |      |       |       |      |       |      |        |       |        |       |     |    |  |
|------------|------|-------|-------|------|-------|------|--------|-------|--------|-------|-----|----|--|
| 7          | 8    |       |       |      |       |      |        |       |        |       |     |    |  |
| SG178_01_2 | 0.48 | 42.62 | 9.76  | 4.37 | 0.437 | 0.05 | 0.0218 | 0.001 | 0.1510 | 0.021 | 122 | 8  |  |
| 8          | 9    |       |       |      |       | 0    |        | 2     |        | 0     |     |    |  |
| SG178_01_2 | 0.35 | 29.37 | 7.21  | 4.07 | 0.496 | 0.06 | 0.0211 | 0.001 | 0.1780 | 0.026 | 114 | 9  |  |
| 9          | 1    |       |       |      |       | 7    |        | 3     |        | 0     |     |    |  |
| SG178_01_3 | 1.11 | 116.1 | 24.09 | 4.82 | 0.287 | 0.03 | 0.0204 | 0.000 | 0.1020 | 0.012 | 122 | 5  |  |
| 0          | 7    | 0     |       |      |       | 4    |        | 8     |        | 0     |     |    |  |
| SG178_01_3 | 0.39 | 33.47 | 8.45  | 3.96 | 0.411 | 0.05 | 0.0216 | 0.001 | 0.1380 | 0.020 | 123 | 9  |  |
| 1          | 4    |       |       |      |       | 7    |        | 4     |        | 0     |     |    |  |
| SG178_01_3 | 0.36 | 29.92 | 7.02  | 4.26 | 0.465 | 0.06 | 0.0249 | 0.001 | 0.1450 | 0.021 | 140 | 10 |  |
| 2          | 7    |       |       |      |       | 3    |        | 6     |        | 0     |     |    |  |
| SG178_01_3 | 0.34 | 27.77 | 6.37  | 4.36 | 0.556 | 0.07 | 0.0246 | 0.001 | 0.1850 | 0.032 | 131 | 11 |  |
| 3          | 4    |       |       |      |       | 8    |        | 7     |        | 0     |     |    |  |
| SG178_01_3 | 0.29 | 26.61 | 6.33  | 4.20 | 0.413 | 0.06 | 0.0217 | 0.001 | 0.1510 | 0.027 | 121 | 10 |  |
| 4          | 8    |       |       |      |       | 5    |        | 6     |        | 0     |     |    |  |
| SG178_01_3 | 0.54 | 49.80 | 10.54 | 4.72 | 0.436 | 0.05 | 0.0221 | 0.001 | 0.1510 | 0.020 | 124 | 8  |  |
| 5          | 9    |       |       |      |       | 4    |        | 2     |        | 0     |     |    |  |
| SG178_01_3 | 0.23 | 14.49 | 4.36  | 3.32 | 0.670 | 0.10 | 0.0244 | 0.001 | 0.2050 | 0.036 | 126 | 12 |  |
| 6          | 1    |       |       |      |       | 0    |        | 8     |        | 0     |     |    |  |
| SG178_01_3 | 0.20 | 14.80 | 4.00  | 3.70 | 0.710 | 0.13 | 0.0248 | 0.002 | 0.2180 | 0.043 | 126 | 16 |  |
| 7          | 5    |       |       |      |       | 0    |        | 6     |        | 0     |     |    |  |
| SG178_01_3 | 0.25 | 12.07 | 3.81  | 3.17 | 1.130 | 0.14 | 0.0280 | 0.002 | 0.3510 | 0.062 | 113 | 18 |  |
| 8          | 3    |       |       |      |       | 0    |        | 5     |        | 0     |     |    |  |
| SG178_01_3 | 0.37 | 13.86 | 3.85  | 3.60 | 1.920 | 0.31 | 0.0343 | 0.003 | 0.4210 | 0.066 | 120 | 24 |  |
| 9          | 1    |       |       |      |       | 0    |        | 4     |        | 0     |     |    |  |
| SG178_01_4 | 0.74 | 70.95 | 15.04 | 4.72 | 0.347 | 0.04 | 0.0210 | 0.001 | 0.1230 | 0.016 | 122 | 8  |  |
| 0          | 9    |       |       |      |       | 0    |        | 2     |        | 0     |     |    |  |
| SG178_01_4 | 0.26 | 15.95 | 4.78  | 3.33 | 0.800 | 0.10 | 0.0243 | 0.001 | 0.2680 | 0.039 | 114 | 12 |  |

---

|            |      |       |       |      |       |      |        |       |        |       |  |     |    |
|------------|------|-------|-------|------|-------|------|--------|-------|--------|-------|--|-----|----|
| 1          | 1    |       |       |      |       | 0    |        | 7     |        | 0     |  |     |    |
| SG178_01_4 | 0.21 | 8.86  | 3.12  | 2.84 | 1.230 | 0.18 | 0.0318 | 0.002 | 0.3070 | 0.057 |  | 139 | 20 |
| 2          | 2    |       |       |      |       | 0    |        | 7     |        | 0     |  |     |    |
| SG178_01_4 | 0.37 | 29.99 | 7.79  | 3.85 | 0.430 | 0.06 | 0.0219 | 0.001 | 0.1510 | 0.024 |  | 122 | 10 |
| 3          | 5    |       |       |      |       | 3    |        | 6     |        | 0     |  |     |    |
| SG178_01_4 | 0.47 | 37.95 | 9.25  | 4.10 | 0.482 | 0.05 | 0.0222 | 0.001 | 0.1640 | 0.021 |  | 122 | 9  |
| 4          | 1    |       |       |      |       | 5    |        | 4     |        | 0     |  |     |    |
| SG178_01_4 | 0.72 | 68.10 | 14.70 | 4.63 | 0.386 | 0.03 | 0.0216 | 0.001 | 0.1340 | 0.015 |  | 124 | 7  |
| 5          | 2    |       |       |      |       | 8    |        | 1     |        | 0     |  |     |    |
| SG178_01_4 | 0.33 | 27.42 | 6.45  | 4.25 | 0.538 | 0.09 | 0.0227 | 0.001 | 0.1810 | 0.033 |  | 122 | 12 |
| 6          | 4    |       |       |      |       | 8    |        | 8     |        | 0     |  |     |    |
| SG178_01_4 | 0.51 | 41.13 | 10.06 | 4.09 | 0.535 | 0.04 | 0.0216 | 0.001 | 0.1860 | 0.020 |  | 115 | 8  |
| 7          | 3    |       |       |      |       | 9    |        | 2     |        | 0     |  |     |    |
| SG178_01_4 | 0.57 | 50.98 | 12.44 | 4.10 | 0.288 | 0.03 | 0.0214 | 0.001 | 0.1060 | 0.014 |  | 127 | 8  |
| 8          | 9    |       |       |      |       | 8    |        | 3     |        | 0     |  |     |    |
| SG178_01_4 | 0.51 | 42.64 | 10.63 | 4.01 | 0.452 | 0.05 | 0.0225 | 0.001 | 0.1590 | 0.022 |  | 124 | 8  |
| 9          | 9    |       |       |      |       | 2    |        | 3     |        | 0     |  |     |    |
| SG178_01_5 | 0.42 | 37.97 | 9.24  | 4.11 | 0.341 | 0.04 | 0.0215 | 0.001 | 0.1210 | 0.020 |  | 125 | 8  |
| 0          | 7    |       |       |      |       | 9    |        | 3     |        | 0     |  |     |    |
| SG178_01_5 | 0.40 | 33.94 | 7.67  | 4.43 | 0.515 | 0.06 | 0.0229 | 0.001 | 0.1750 | 0.026 |  | 124 | 9  |
| 1          | 8    |       |       |      |       | 5    |        | 4     |        | 0     |  |     |    |
| SG178_01_5 | 0.30 | 25.23 | 5.86  | 4.31 | 0.471 | 0.07 | 0.0227 | 0.001 | 0.1540 | 0.025 |  | 126 | 10 |
| 2          | 5    |       |       |      |       | 0    |        | 6     |        | 0     |  |     |    |
| SG178_01_5 | 0.31 | 22.58 | 5.89  | 3.83 | 0.505 | 0.06 | 0.0238 | 0.001 | 0.1680 | 0.025 |  | 130 | 10 |
| 3          | 8    |       |       |      |       | 7    |        | 6     |        | 0     |  |     |    |
| SG178_01_5 | 0.21 | 12.49 | 3.92  | 3.19 | 0.798 | 0.09 | 0.0260 | 0.002 | 0.2600 | 0.036 |  | 123 | 14 |
| 4          | 7    |       |       |      |       | 2    |        | 4     |        | 0     |  |     |    |

---

---

**Table S7-1 Sr isotopic analytical results of MAP-3 apatite**

| <b>Session</b> | <b>Rb<br/>(<math>\mu\text{g}\cdot\text{g}^{-1}</math>)</b> | <b>Sr<br/>(<math>\mu\text{g}\cdot\text{g}^{-1}</math>)</b> | <b>Er/Sr</b> | <b>Yb/Sr</b> | <b><math>^{87}\text{Rb}/^{86}\text{Sr}</math></b> | <b><math>2\sigma</math></b> | <b><math>^{87}\text{Sr}/^{86}\text{Sr}</math></b> | <b><math>2\sigma</math></b> |
|----------------|------------------------------------------------------------|------------------------------------------------------------|--------------|--------------|---------------------------------------------------|-----------------------------|---------------------------------------------------|-----------------------------|
| IGGCAS         | 0.0869                                                     | 160                                                        | 0.41         | 0.32         | 0.0025                                            | 0.00004                     | 0.7394                                            | 0.0002                      |
| CUGB           |                                                            |                                                            |              |              | —                                                 | —                           | 0.7366                                            | 0.0005                      |

**Table S7-2 Sr isotopic composition of the MAP-3 apatite by LA-MC-ICP-MS**

| Sample                                                                | $^{84}\text{Sr}/^{86}\text{Sr}$ | 2s     | $^{87}\text{Sr}/^{86}\text{Sr}$ | 2s      | $^{84}\text{Sr}/^{88}\text{Sr}$ | 2s      | $^{87}\text{Rb}/^{86}\text{Sr}$ | 2s     |
|-----------------------------------------------------------------------|---------------------------------|--------|---------------------------------|---------|---------------------------------|---------|---------------------------------|--------|
| Session 1 of IGGCAS @ 150 $\mu\text{m}$ , 6 J·cm <sup>-2</sup> , 6 Hz |                                 |        |                                 |         |                                 |         |                                 |        |
| MAP-3-1                                                               | 0.0795                          | 0.0013 | 0.73957                         | 0.00022 | 0.00949                         | 0.00015 | 0.0027                          | 0.0001 |
| MAP-3-2                                                               | 0.0807                          | 0.0013 | 0.73962                         | 0.00021 | 0.00963                         | 0.00015 | 0.0027                          | 0.0000 |
| MAP-3-3                                                               | 0.0806                          | 0.0013 | 0.73965                         | 0.00023 | 0.00963                         | 0.00015 | 0.0027                          | 0.0000 |
| MAP-3-4                                                               | 0.0803                          | 0.0013 | 0.73852                         | 0.00021 | 0.00959                         | 0.00015 | 0.0026                          | 0.0000 |
| MAP-3-5                                                               | 0.0793                          | 0.0012 | 0.73861                         | 0.00020 | 0.00947                         | 0.00014 | 0.0027                          | 0.0000 |
| MAP-3-6                                                               | 0.0797                          | 0.0012 | 0.73920                         | 0.00021 | 0.00951                         | 0.00014 | 0.0026                          | 0.0000 |
| MAP-3-7                                                               | 0.0802                          | 0.0011 | 0.74077                         | 0.00021 | 0.00957                         | 0.00014 | 0.0027                          | 0.0000 |
| MAP-3-8                                                               | 0.0816                          | 0.0012 | 0.73984                         | 0.00024 | 0.00975                         | 0.00015 | 0.0025                          | 0.0000 |
| MAP-3-9                                                               | 0.0820                          | 0.0012 | 0.74073                         | 0.00022 | 0.00979                         | 0.00015 | 0.0026                          | 0.0000 |
| MAP-3-10                                                              | 0.0780                          | 0.0012 | 0.73922                         | 0.00019 | 0.00931                         | 0.00014 | 0.0026                          | 0.0000 |
| MAP-3-11                                                              | 0.0821                          | 0.0011 | 0.73977                         | 0.00022 | 0.00980                         | 0.00014 | 0.0026                          | 0.0000 |
| MAP-3-12                                                              | 0.0799                          | 0.0012 | 0.73930                         | 0.00022 | 0.00954                         | 0.00014 | 0.0025                          | 0.0000 |
| MAP-3-13                                                              | 0.0777                          | 0.0012 | 0.73908                         | 0.00020 | 0.00928                         | 0.00014 | 0.0025                          | 0.0000 |
| MAP-3-14                                                              | 0.0802                          | 0.0013 | 0.73913                         | 0.00023 | 0.00958                         | 0.00015 | 0.0025                          | 0.0000 |
| MAP-3-15                                                              | 0.0796                          | 0.0012 | 0.73869                         | 0.00020 | 0.00951                         | 0.00014 | 0.0025                          | 0.0000 |
| MAP-3-16                                                              | 0.0807                          | 0.0011 | 0.73961                         | 0.00018 | 0.00964                         | 0.00013 | 0.0028                          | 0.0001 |
| MAP-3-17                                                              | 0.0793                          | 0.0013 | 0.73888                         | 0.00021 | 0.00947                         | 0.00015 | 0.0025                          | 0.0000 |
| MAP-3-18                                                              | 0.0800                          | 0.0011 | 0.73979                         | 0.00020 | 0.00955                         | 0.00013 | 0.0025                          | 0.0000 |
| MAP-3-19                                                              | 0.0793                          | 0.0012 | 0.74063                         | 0.00021 | 0.00947                         | 0.00015 | 0.0026                          | 0.0000 |
| MAP-3-20                                                              | 0.0802                          | 0.0013 | 0.74024                         | 0.00024 | 0.00958                         | 0.00016 | 0.0025                          | 0.0000 |
| MAP-3-21                                                              | 0.0764                          | 0.0013 | 0.73833                         | 0.00021 | 0.00913                         | 0.00015 | 0.0023                          | 0.0000 |
| MAP-3-22                                                              | 0.0797                          | 0.0011 | 0.73985                         | 0.00022 | 0.00952                         | 0.00014 | 0.0025                          | 0.0000 |
| MAP-3-23                                                              | 0.0812                          | 0.0011 | 0.74057                         | 0.00019 | 0.00970                         | 0.00013 | 0.0026                          | 0.0000 |

---

|          |        |        |         |         |         |         |        |        |
|----------|--------|--------|---------|---------|---------|---------|--------|--------|
| MAP-3-24 | 0.0801 | 0.0012 | 0.73944 | 0.00021 | 0.00956 | 0.00014 | 0.0025 | 0.0000 |
| MAP-3-25 | 0.0795 | 0.0013 | 0.73884 | 0.00020 | 0.00949 | 0.00016 | 0.0025 | 0.0000 |
| MAP-3-26 | 0.0819 | 0.0013 | 0.74016 | 0.00021 | 0.00978 | 0.00016 | 0.0026 | 0.0000 |
| MAP-3-27 | 0.0809 | 0.0011 | 0.74046 | 0.00019 | 0.00966 | 0.00013 | 0.0026 | 0.0000 |
| MAP-3-28 | 0.0794 | 0.0011 | 0.74015 | 0.00020 | 0.00948 | 0.00013 | 0.0026 | 0.0000 |
| MAP-3-29 | 0.0800 | 0.0012 | 0.73998 | 0.00021 | 0.00956 | 0.00014 | 0.0026 | 0.0000 |
| MAP-3-30 | 0.0785 | 0.0012 | 0.73967 | 0.00020 | 0.00937 | 0.00014 | 0.0025 | 0.0000 |
| MAP-3-31 | 0.0790 | 0.0011 | 0.73844 | 0.00018 | 0.00944 | 0.00013 | 0.0023 | 0.0000 |
| MAP-3-32 | 0.0774 | 0.0013 | 0.73938 | 0.00023 | 0.00924 | 0.00015 | 0.0024 | 0.0000 |
| MAP-3-33 | 0.0804 | 0.0013 | 0.73952 | 0.00023 | 0.00959 | 0.00016 | 0.0024 | 0.0000 |
| MAP-3-34 | 0.0782 | 0.0012 | 0.73918 | 0.00021 | 0.00933 | 0.00015 | 0.0024 | 0.0000 |
| MAP-3-35 | 0.0789 | 0.0011 | 0.73843 | 0.00019 | 0.00941 | 0.00013 | 0.0023 | 0.0000 |
| MAP-3-36 | 0.0782 | 0.0013 | 0.73830 | 0.00023 | 0.00933 | 0.00015 | 0.0024 | 0.0000 |
| MAP-3-37 | 0.0786 | 0.0012 | 0.73879 | 0.00019 | 0.00939 | 0.00014 | 0.0024 | 0.0000 |
| MAP-3-38 | 0.0814 | 0.0011 | 0.74028 | 0.00022 | 0.00972 | 0.00014 | 0.0027 | 0.0000 |
| MAP-3-39 | 0.0822 | 0.0011 | 0.73938 | 0.00019 | 0.00981 | 0.00014 | 0.0025 | 0.0000 |
| MAP-3-40 | 0.0797 | 0.0012 | 0.74021 | 0.00021 | 0.00952 | 0.00014 | 0.0026 | 0.0000 |
|          |        |        |         |         |         |         |        |        |
| AP1-01   | 0.0573 | 0.0003 | 0.71145 | 0.00006 | 0.00684 | 0.00004 | 0.0001 | 0.0000 |
| AP1-02   | 0.0584 | 0.0004 | 0.71163 | 0.00007 | 0.00697 | 0.00004 | 0.0001 | 0.0000 |
| AP1-03   | 0.0571 | 0.0004 | 0.71143 | 0.00007 | 0.00682 | 0.00004 | 0.0001 | 0.0000 |
| AP1-04   | 0.0577 | 0.0004 | 0.71154 | 0.00007 | 0.00689 | 0.00005 | 0.0001 | 0.0000 |
| AP1-05   | 0.0571 | 0.0004 | 0.71140 | 0.00008 | 0.00682 | 0.00005 | 0.0001 | 0.0000 |

Note:AP1 as secondary RMs

---

| Sample | $^{84}\text{Sr}/$<br>$^{86}\text{Sr}$ | 2s | $^{87}\text{Sr}/^{86}\text{Sr}$ | 2s |
|--------|---------------------------------------|----|---------------------------------|----|
|--------|---------------------------------------|----|---------------------------------|----|

---

Session 2 of CUGB @ 90  $\mu\text{m}$ , 5  $\text{J}\cdot\text{cm}^{-2}$ , 6 Hz

---

|          |        |        |         |         |
|----------|--------|--------|---------|---------|
| MAP-3-1  | 0.0641 | 0.0001 | 0.73731 | 0.00015 |
| MAP-3-2  | 0.0637 | 0.0001 | 0.73602 | 0.00015 |
| MAP-3-3  | 0.0641 | 0.0001 | 0.73699 | 0.00020 |
| MAP-3-4  | 0.0641 | 0.0001 | 0.73713 | 0.00013 |
| MAP-3-5  | 0.0638 | 0.0001 | 0.73652 | 0.00015 |
| MAP-3-6  | 0.0643 | 0.0001 | 0.73797 | 0.00019 |
| MAP-3-7  | 0.0640 | 0.0001 | 0.73716 | 0.00015 |
| MAP-3-8  | 0.0639 | 0.0001 | 0.73686 | 0.00015 |
| MAP-3-9  | 0.0642 | 0.0001 | 0.73796 | 0.00016 |
| MAP-3-10 | 0.0642 | 0.0001 | 0.73797 | 0.00018 |
| MAP-3-11 | 0.0644 | 0.0001 | 0.73840 | 0.00015 |
| MAP-3-12 | 0.0643 | 0.0001 | 0.73842 | 0.00013 |
| MAP-3-13 | 0.0642 | 0.0001 | 0.73845 | 0.00016 |
| MAP-3-14 | 0.0642 | 0.0001 | 0.73831 | 0.00017 |
| MAP-3-15 | 0.0643 | 0.0001 | 0.73839 | 0.00017 |
| MAP-3-16 | 0.0644 | 0.0001 | 0.73877 | 0.00017 |
| MAP-3-17 | 0.0641 | 0.0001 | 0.73780 | 0.00015 |
| MAP-3-18 | 0.0642 | 0.0001 | 0.73837 | 0.00017 |
| MAP-3-19 | 0.0641 | 0.0001 | 0.73773 | 0.00019 |
| MAP-3-20 | 0.0642 | 0.0001 | 0.73800 | 0.00015 |
| MAP-3-21 | 0.0634 | 0.0001 | 0.73605 | 0.00016 |
| MAP-3-22 | 0.0639 | 0.0001 | 0.73755 | 0.00017 |
| MAP-3-23 | 0.0638 | 0.0001 | 0.73731 | 0.00017 |
| MAP-3-24 | 0.0636 | 0.0001 | 0.73653 | 0.00015 |
| MAP-3-25 | 0.0637 | 0.0001 | 0.73714 | 0.00013 |
| MAP-3-26 | 0.0633 | 0.0001 | 0.73554 | 0.00018 |
| MAP-3-27 | 0.0634 | 0.0001 | 0.73538 | 0.00016 |
| MAP-3-28 | 0.0632 | 0.0001 | 0.73480 | 0.00013 |



---

|          |        |        |         |         |
|----------|--------|--------|---------|---------|
| MAP-3-29 | 0.0633 | 0.0001 | 0.73496 | 0.00015 |
| MAP-3-30 | 0.0629 | 0.0001 | 0.73366 | 0.00014 |
| MAP-3-31 | 0.0633 | 0.0001 | 0.73448 | 0.00015 |
| MAP-3-32 | 0.0636 | 0.0001 | 0.73557 | 0.00016 |
| MAP-3-33 | 0.0634 | 0.0001 | 0.73487 | 0.00016 |
| MAP-3-34 | 0.0635 | 0.0001 | 0.73537 | 0.00014 |
| MAP-3-35 | 0.0633 | 0.0001 | 0.73497 | 0.00017 |
| MAP-3-36 | 0.0636 | 0.0001 | 0.73563 | 0.00012 |
| MAP-3-37 | 0.0633 | 0.0001 | 0.73504 | 0.00018 |
| MAP-3-38 | 0.0634 | 0.0001 | 0.73491 | 0.00017 |
| MAP-3-39 | 0.0637 | 0.0001 | 0.73548 | 0.00017 |
| MAP-3-40 | 0.0634 | 0.0001 | 0.73498 | 0.00016 |

|            |        |        |         |         |
|------------|--------|--------|---------|---------|
| Durango-01 | 0.0581 | 0.0000 | 0.70582 | 0.00007 |
| Durango-02 | 0.0582 | 0.0000 | 0.70586 | 0.00007 |
| Durango-03 | 0.0580 | 0.0000 | 0.70580 | 0.00007 |
| Durango-04 | 0.0581 | 0.0000 | 0.70590 | 0.00008 |
| Durango-05 | 0.0581 | 0.0001 | 0.70585 | 0.00008 |

---

Note: Durango as secondary RMs

**Table S8-1 Nd isotopic composition of the MAP-3 apatite by Solution-TIMS at CUGB**

| Sample        | $^{143}\text{Nd}/^{144}\text{Nd}$ | 2s       |
|---------------|-----------------------------------|----------|
| Solution-TIMS |                                   |          |
| MAP-3-1       | 0.511258                          | 0.000010 |
| MAP-3-2       | 0.511248                          | 0.000010 |
| MAP-3-3       | 0.511256                          | 0.000010 |
| MAP-3-4       | 0.511262                          | 0.000010 |
| MAP-3-5       | 0.511239                          | 0.000010 |
| MAP-3-6       | 0.511231                          | 0.000010 |
| MAP-3-7       | 0.511242                          | 0.000010 |
| MAP-3-8       | 0.511263                          | 0.000010 |

**Table S8-2 Nd isotopic composition of the MAP-3 apatite by ID-TIMS at CAGS**

| Sample     | Sm  | Nd   | $^{147}\text{Sm}/^{144}\text{Nd}$ | $^{143}\text{Nd}/^{144}\text{Nd}$ | 2s       |
|------------|-----|------|-----------------------------------|-----------------------------------|----------|
| ID-TIMS    |     |      |                                   |                                   |          |
| MAP-3-1    | 224 | 1520 | 0.0892                            | 0.511247                          | 0.000006 |
| MAP-3-2    | 225 | 1542 | 0.0881                            | 0.511243                          | 0.000007 |
| MAP-3-3    | 225 | 1535 | 0.0885                            | 0.511249                          | 0.000008 |
| <b>2SD</b> |     |      | <b>0.0011</b>                     |                                   |          |

**Table S8-3 Nd isotopic composition of the MAP-3 apatite by LA-MC-ICP-MS**

| Sample                                                   | <sup>147</sup> Sm/ <sup>144</sup> Nd | 2s     | <sup>145</sup> Nd/ <sup>144</sup> Nd | 2s       | <sup>143</sup> Nd/ <sup>144</sup> Nd | 2s           | <sup>143</sup> Nd/ <sup>144</sup> Nd | eNd(0) | 2s | eNd(t) | 2s   |
|----------------------------------------------------------|--------------------------------------|--------|--------------------------------------|----------|--------------------------------------|--------------|--------------------------------------|--------|----|--------|------|
| Session 1 of IGGCAS @ 65 μm, 5 J·cm <sup>-2</sup> , 6 Hz |                                      |        |                                      |          |                                      |              |                                      |        |    |        |      |
| MAP-3-1                                                  | 0.0911                               | 0.0001 | 0.348405                             | 0.000020 | 0.51123<br>8                         | 0.00003<br>2 | 0.510760                             | -27.31 | 2  | -16.53 | 0.62 |
| MAP-3-2                                                  | 0.0900                               | 0.0001 | 0.348412                             | 0.000020 | 0.51129<br>2                         | 0.00003<br>1 | 0.510819                             | -26.25 | 0  | -15.36 | 0.60 |
| MAP-3-3                                                  | 0.0910                               | 0.0001 | 0.348379                             | 0.000020 | 0.51128<br>8                         | 0.00003<br>4 | 0.510810                             | -26.34 | 5  | -15.55 | 0.66 |
| MAP-3-4                                                  | 0.0908                               | 0.0001 | 0.348413                             | 0.000021 | 0.51126<br>1                         | 0.00003<br>4 | 0.510784                             | -26.86 | 5  | -16.05 | 0.66 |
| MAP-3-5                                                  | 0.0890                               | 0.0001 | 0.348425                             | 0.000017 | 0.51126<br>7                         | 0.00003<br>0 | 0.510800                             | -26.74 | 9  | -15.75 | 0.59 |
| MAP-3-6                                                  | 0.0884                               | 0.0001 | 0.348375                             | 0.000019 | 0.51124<br>9                         | 0.00003<br>0 | 0.510784                             | -27.10 | 9  | -16.05 | 0.59 |
| MAP-3-7                                                  | 0.0894                               | 0.0001 | 0.348426                             | 0.000019 | 0.51123<br>1                         | 0.00003<br>5 | 0.510762                             | -27.44 | 9  | -16.49 | 0.69 |
| MAP-3-8                                                  | 0.0891                               | 0.0001 | 0.348409                             | 0.000018 | 0.51128<br>5                         | 0.00003<br>4 | 0.510817                             | -26.39 | 6  | -15.41 | 0.66 |
| MAP-3-9                                                  | 0.0886                               | 0.0001 | 0.348397                             | 0.000021 | 0.51125<br>7                         | 0.00003<br>7 | 0.510792                             | -26.94 | 3  | -15.90 | 0.73 |
| MAP-3-10                                                 | 0.0884                               | 0.0001 | 0.348391                             | 0.000020 | 0.51124<br>4                         | 0.00003<br>7 | 0.510780                             | -27.20 | 2  | -16.14 | 0.72 |
| MAP-3-11                                                 | 0.0889                               | 0.0001 | 0.348414                             | 0.000021 | 0.51127<br>1                         | 0.00003<br>6 | 0.510804                             | -26.66 | 1  | -15.66 | 0.71 |
| MAP-3-12                                                 | 0.0886                               | 0.0001 | 0.348409                             | 0.000021 | 0.51125<br>2                         | 0.00003<br>2 | 0.510786                             | -27.04 | 2  | -16.01 | 0.62 |

|          |        |        |          |          |              |              |          |        |          |        |      |
|----------|--------|--------|----------|----------|--------------|--------------|----------|--------|----------|--------|------|
| MAP-3-13 | 0.0895 | 0.0001 | 0.348393 | 0.000020 | 0.51125<br>3 | 0.00003<br>0 | 0.510783 | -27.01 | 0.5<br>9 | -16.07 | 0.59 |
| MAP-3-14 | 0.0897 | 0.0001 | 0.348386 | 0.000022 | 0.51126<br>5 | 0.00003<br>5 | 0.510794 | -26.79 | 0.6<br>9 | -15.86 | 0.69 |
| MAP-3-15 | 0.0897 | 0.0001 | 0.348411 | 0.000018 | 0.51122<br>8 | 0.00003<br>0 | 0.510757 | -27.51 | 0.5<br>8 | -16.59 | 0.58 |
| MAP-3-16 | 0.0900 | 0.0001 | 0.348392 | 0.000021 | 0.51122<br>8 | 0.00003<br>4 | 0.510756 | -27.50 | 0.6<br>7 | -16.61 | 0.67 |
| MAP-3-17 | 0.0900 | 0.0001 | 0.348390 | 0.000021 | 0.51127<br>9 | 0.00003<br>4 | 0.510806 | -26.52 | 0.6<br>7 | -15.62 | 0.67 |
| MAP-3-18 | 0.0906 | 0.0001 | 0.348411 | 0.000020 | 0.51131<br>3 | 0.00003<br>1 | 0.510837 | -25.85 | 0.6<br>1 | -15.02 | 0.61 |
| MAP-3-19 | 0.0903 | 0.0001 | 0.348390 | 0.000019 | 0.51127<br>6 | 0.00003<br>2 | 0.510802 | -26.57 | 0.6<br>1 | -15.70 | 0.62 |
| MAP-3-20 | 0.0891 | 0.0001 | 0.348398 | 0.000018 | 0.51129<br>4 | 0.00003<br>3 | 0.510826 | -26.22 | 0.6<br>4 | -15.24 | 0.64 |
| MAP-3-21 | 0.0893 | 0.0001 | 0.348381 | 0.000018 | 0.51123<br>9 | 0.00003<br>3 | 0.510770 | -27.29 | 0.6<br>4 | -16.33 | 0.64 |
| MAP-3-22 | 0.0891 | 0.0001 | 0.348413 | 0.000020 | 0.51127<br>1 | 0.00003<br>7 | 0.510803 | -26.67 | 0.7<br>3 | -15.68 | 0.73 |
| MAP-3-23 | 0.0891 | 0.0001 | 0.348408 | 0.000021 | 0.51125<br>4 | 0.00003<br>4 | 0.510786 | -27.00 | 0.6<br>7 | -16.01 | 0.67 |
| MAP-3-24 | 0.0897 | 0.0001 | 0.348386 | 0.000022 | 0.51129<br>4 | 0.00003<br>4 | 0.510823 | -26.22 | 0.6<br>6 | -15.29 | 0.66 |
| MAP-3-25 | 0.0877 | 0.0001 | 0.348384 | 0.000022 | 0.51124<br>6 | 0.00003<br>4 | 0.510786 | -27.14 | 0.6<br>5 | -16.02 | 0.66 |
| MAP-3-26 | 0.0880 | 0.0001 | 0.348349 | 0.000022 | 0.51123<br>9 | 0.00003<br>8 | 0.510777 | -27.29 | 0.7<br>5 | -16.20 | 0.75 |

---

|          |        |        |          |          |              |              |          |        |   |        |      |
|----------|--------|--------|----------|----------|--------------|--------------|----------|--------|---|--------|------|
| MAP-3-27 | 0.0884 | 0.0000 | 0.348386 | 0.000019 | 0.51127<br>0 | 0.00003<br>2 | 0.510805 | -26.69 | 2 | -15.64 | 0.62 |
| MAP-3-28 | 0.0909 | 0.0001 | 0.348400 | 0.000021 | 0.51128<br>4 | 0.00003<br>7 | 0.510806 | -26.42 | 3 | -15.62 | 0.73 |
| MAP-3-29 | 0.0906 | 0.0001 | 0.348382 | 0.000020 | 0.51127<br>6 | 0.00003<br>2 | 0.510800 | -26.57 | 3 | -15.73 | 0.63 |
| MAP-3-30 | 0.0905 | 0.0001 | 0.348378 | 0.000019 | 0.51126<br>9 | 0.00003<br>2 | 0.510794 | -26.71 | 3 | -15.87 | 0.63 |
| MAP-3-31 | 0.0896 | 0.0001 | 0.348363 | 0.000020 | 0.51125<br>0 | 0.00003<br>5 | 0.510780 | -27.07 | 8 | -16.13 | 0.68 |
| MAP-3-32 | 0.0894 | 0.0001 | 0.348415 | 0.000020 | 0.51127<br>8 | 0.00003<br>4 | 0.510809 | -26.53 | 7 | -15.57 | 0.67 |
| MAP-3-33 | 0.0897 | 0.0001 | 0.348384 | 0.000022 | 0.51125<br>6 | 0.00003<br>4 | 0.510785 | -26.96 | 6 | -16.03 | 0.66 |
| MAP-3-34 | 0.0895 | 0.0001 | 0.348385 | 0.000020 | 0.51129<br>0 | 0.00003<br>7 | 0.510820 | -26.29 | 3 | -15.35 | 0.73 |
| MAP-3-35 | 0.0876 | 0.0001 | 0.348398 | 0.000020 | 0.51127<br>8 | 0.00003<br>3 | 0.510818 | -26.53 | 3 | -15.39 | 0.64 |
| MAP-3-36 | 0.0878 | 0.0001 | 0.348392 | 0.000021 | 0.51124<br>2 | 0.00003<br>4 | 0.510781 | -27.23 | 7 | -16.11 | 0.67 |
| MAP-3-37 | 0.0913 | 0.0001 | 0.348402 | 0.000020 | 0.51127<br>8 | 0.00003<br>5 | 0.510799 | -26.52 | 8 | -15.76 | 0.68 |
| MAP-3-38 | 0.0917 | 0.0001 | 0.348381 | 0.000019 | 0.51127<br>5 | 0.00003<br>5 | 0.510793 | -26.59 | 7 | -15.87 | 0.67 |
| MAP-3-39 | 0.0923 | 0.0001 | 0.348365 | 0.000021 | 0.51128<br>8 | 0.00003<br>7 | 0.510803 | -26.34 | 3 | -15.69 | 0.73 |
| MAP-3-40 | 0.0917 | 0.0001 | 0.348404 | 0.000021 | 0.51134<br>1 | 0.00003<br>3 | 0.510859 | -25.30 | 3 | -14.58 | 0.64 |

|               |               |  |  |  |                |  |  |              |  |              |  |
|---------------|---------------|--|--|--|----------------|--|--|--------------|--|--------------|--|
| <b>Mean</b>   | <b>0.0897</b> |  |  |  | <b>0.51126</b> |  |  |              |  |              |  |
|               |               |  |  |  | <b>7</b>       |  |  | <b>-26.7</b> |  | <b>-15.8</b> |  |
| <b>2SD</b>    | <b>0.0023</b> |  |  |  | <b>0.00004</b> |  |  |              |  |              |  |
|               |               |  |  |  | <b>8</b>       |  |  | <b>0.9</b>   |  | <b>0.9</b>   |  |
| <b>RSD(%)</b> | <b>2.57</b>   |  |  |  | <b>0.01</b>    |  |  | <b>-3.48</b> |  | <b>-5.39</b> |  |

|        |        |        |          |          |          |          |          |  |  |  |  |
|--------|--------|--------|----------|----------|----------|----------|----------|--|--|--|--|
| AP1-01 | 0.0827 | 0.0000 | 0.348395 | 0.000021 | 0.51132  | 0.00002  | 0.510892 |  |  |  |  |
|        |        |        |          |          | <b>6</b> | <b>8</b> |          |  |  |  |  |
| AP1-02 | 0.0825 | 0.0001 | 0.348389 | 0.000017 | 0.51135  | 0.00003  | 0.510921 |  |  |  |  |
|        |        |        |          |          | <b>4</b> | <b>1</b> |          |  |  |  |  |
| AP1-03 | 0.0828 | 0.0001 | 0.348381 | 0.000020 | 0.51132  | 0.00003  | 0.510889 |  |  |  |  |
|        |        |        |          |          | <b>4</b> | <b>3</b> |          |  |  |  |  |
| AP1-04 | 0.0825 | 0.0000 | 0.348394 | 0.000019 | 0.51132  | 0.00003  | 0.510896 |  |  |  |  |
|        |        |        |          |          | <b>9</b> | <b>2</b> |          |  |  |  |  |
| AP1-05 | 0.0830 | 0.0001 | 0.348378 | 0.000019 | 0.51131  | 0.00003  | 0.510874 |  |  |  |  |
|        |        |        |          |          | <b>0</b> | <b>2</b> |          |  |  |  |  |

|               |               |  |  |  |                |  |  |  |  |  |  |
|---------------|---------------|--|--|--|----------------|--|--|--|--|--|--|
| <b>Mean</b>   | <b>0.0827</b> |  |  |  | <b>0.51132</b> |  |  |  |  |  |  |
|               |               |  |  |  | <b>9</b>       |  |  |  |  |  |  |
| <b>2SD</b>    | <b>0.0005</b> |  |  |  | <b>0.00003</b> |  |  |  |  |  |  |
|               |               |  |  |  | <b>2</b>       |  |  |  |  |  |  |
| <b>RSD(%)</b> | <b>0.56</b>   |  |  |  | <b>0.01</b>    |  |  |  |  |  |  |

Note: AP1 as secondary RMs

Session 2 of CUGB @ 75  $\mu\text{m}$ , 5 J·cm<sup>-2</sup>, 6 Hz

|         |        |        |          |          |          |          |          |               |            |               |             |
|---------|--------|--------|----------|----------|----------|----------|----------|---------------|------------|---------------|-------------|
| MAP-3-1 | 0.0903 | 0.0001 | 0.348427 | 0.000015 | 0.51122  | 0.00002  | 0.510755 |               | 0.4        |               |             |
|         |        |        |          |          | <b>9</b> | <b>4</b> |          | <b>-27.49</b> | <b>7</b>   | <b>-17.08</b> | <b>0.47</b> |
| MAP-3-2 | 0.0903 | 0.0000 | 0.348426 | 0.000015 | 0.51121  | 0.00002  | 0.510741 | <b>-27.76</b> | <b>0.4</b> | <b>-17.36</b> | <b>0.49</b> |

---

|          |        |        |          |          |                   |                   |          |        |               |        |      |
|----------|--------|--------|----------|----------|-------------------|-------------------|----------|--------|---------------|--------|------|
| MAP-3-3  | 0.0908 | 0.0000 | 0.348421 | 0.000014 | 5<br>0.51127<br>0 | 5<br>0.00002<br>4 | 0.510793 | -26.69 | 9<br>0.4<br>7 | -16.33 | 0.47 |
| MAP-3-4  | 0.0910 | 0.0000 | 0.348442 | 0.000016 | 2<br>0.51123      | 8<br>0.00002      | 0.510754 | -27.43 | 5<br>0.5      | -17.10 | 0.55 |
| MAP-3-5  | 0.0913 | 0.0001 | 0.348432 | 0.000012 | 9<br>0.51123      | 5<br>0.00002      | 0.510759 | -27.29 | 9<br>0.4      | -17.00 | 0.49 |
| MAP-3-6  | 0.0904 | 0.0001 | 0.348425 | 0.000014 | 3<br>0.51123      | 4<br>0.00002      | 0.510758 | -27.41 | 7<br>0.4      | -17.02 | 0.47 |
| MAP-3-7  | 0.0906 | 0.0001 | 0.348434 | 0.000013 | 5<br>0.51122      | 6<br>0.00002      | 0.510749 | -27.56 | 1<br>0.5      | -17.19 | 0.51 |
| MAP-3-8  | 0.0909 | 0.0001 | 0.348420 | 0.000015 | 3<br>0.51122      | 9<br>0.00002      | 0.510745 | -27.60 | 7<br>0.5      | -17.26 | 0.57 |
| MAP-3-9  | 0.0907 | 0.0001 | 0.348430 | 0.000014 | 9<br>0.51122      | 7<br>0.00002      | 0.510753 | -27.49 | 3<br>0.5      | -17.12 | 0.53 |
| MAP-3-10 | 0.0904 | 0.0001 | 0.348416 | 0.000017 | 7<br>0.51123      | 3<br>0.00002      | 0.510762 | -27.33 | 5<br>0.4      | -16.94 | 0.45 |
| MAP-3-11 | 0.0901 | 0.0001 | 0.348421 | 0.000015 | 6<br>0.51121      | 6<br>0.00002      | 0.510743 | -27.74 | 1<br>0.5      | -17.31 | 0.51 |
| MAP-3-12 | 0.0895 | 0.0001 | 0.348428 | 0.000016 | 1<br>0.51123      | 9<br>0.00002      | 0.510761 | -27.45 | 7<br>0.5      | -16.95 | 0.57 |
| MAP-3-13 | 0.0890 | 0.0000 | 0.348430 | 0.000017 | 5<br>0.51125      | 4<br>0.00002      | 0.510788 | -26.98 | 7<br>0.4      | -16.43 | 0.47 |
| MAP-3-14 | 0.0898 | 0.0001 | 0.348433 | 0.000016 | 5<br>0.51124      | 8<br>0.00002      | 0.510773 | -27.17 | 5<br>0.5      | -16.71 | 0.55 |
| MAP-3-15 | 0.0904 | 0.0001 | 0.348424 | 0.000015 | 3<br>0.51123      | 8<br>0.00002      | 0.510758 | -27.41 | 5<br>0.5      | -17.02 | 0.55 |
| MAP-3-16 | 0.0901 | 0.0001 | 0.348428 | 0.000016 | 5<br>0.51124      | 5<br>0.00002      | 0.510768 | -27.25 | 9<br>0.5      | -16.82 | 0.57 |

---

|          |        |        |          |          |              |              |          |        |          |               |      |
|----------|--------|--------|----------|----------|--------------|--------------|----------|--------|----------|---------------|------|
| MAP-3-17 | 0.0900 | 0.0001 | 0.348426 | 0.000016 | 0.51122<br>8 | 0.00002<br>2 | 0.510755 | -27.50 | 7<br>3   | 0.4<br>-17.07 | 0.43 |
| MAP-3-18 | 0.0899 | 0.0001 | 0.348422 | 0.000018 | 0.51123<br>0 | 0.00002<br>1 | 0.510758 | -27.47 | 7<br>1   | 0.4<br>-17.02 | 0.41 |
| MAP-3-19 | 0.0899 | 0.0001 | 0.348440 | 0.000014 | 0.51124<br>4 | 0.00002<br>2 | 0.510772 | -27.19 | 7<br>3   | 0.4<br>-16.75 | 0.43 |
| MAP-3-20 | 0.0903 | 0.0001 | 0.348429 | 0.000016 | 0.51123<br>9 | 0.00002<br>4 | 0.510765 | -27.29 | 7<br>7   | 0.4<br>-16.89 | 0.47 |
| MAP-3-21 | 0.0908 | 0.0001 | 0.348425 | 0.000013 | 0.51124<br>8 | 0.00002<br>6 | 0.510771 | -27.11 | 7<br>1   | 0.5<br>-16.77 | 0.51 |
| MAP-3-22 | 0.0914 | 0.0001 | 0.348436 | 0.000014 | 0.51125<br>1 | 0.00002<br>9 | 0.510771 | -27.06 | 7<br>7   | 0.5<br>-16.77 | 0.57 |
| MAP-3-23 | 0.0913 | 0.0001 | 0.348430 | 0.000015 | 0.51124<br>0 | 0.00002<br>5 | 0.510760 | -27.27 | 7<br>9   | 0.4<br>-16.98 | 0.49 |
| MAP-3-24 | 0.0917 | 0.0000 | 0.348435 | 0.000015 | 0.51123<br>7 | 0.00002<br>9 | 0.510755 | -27.33 | 7<br>7   | 0.5<br>-17.08 | 0.57 |
| MAP-3-25 | 0.0924 | 0.0001 | 0.348433 | 0.000015 | 0.51125<br>8 | 0.00002<br>2 | 0.510773 | -26.92 | 7<br>3   | 0.4<br>-16.74 | 0.43 |
| MAP-3-26 | 0.0928 | 0.0001 | 0.348426 | 0.000016 | 0.51127<br>0 | 0.00002<br>2 | 0.510783 | -26.69 | 7<br>3   | 0.4<br>-16.55 | 0.43 |
| MAP-3-27 | 0.0921 | 0.0001 | 0.348433 | 0.000016 | 0.51125<br>0 | 0.00002<br>4 | 0.510766 | -27.08 | 7<br>7   | 0.4<br>-16.86 | 0.47 |
| MAP-3-28 | 0.0913 | 0.0001 | 0.348436 | 0.000013 | 0.51124<br>8 | 0.00002<br>5 | 0.510768 | -27.11 | 7<br>9   | 0.4<br>-16.82 | 0.49 |
| MAP-3-29 | 0.0900 | 0.0001 | 0.348410 | 0.000015 | 0.51122<br>9 | 0.00002<br>7 | 0.510756 | -27.49 | 7<br>3   | 0.5<br>-17.05 | 0.53 |
| MAP-3-30 | 0.0896 | 0.0001 | 0.348408 | 0.000018 | 0.51122      | 0.00002      | 0.510752 | -27.60 | 7<br>0.5 | 0.4<br>-17.13 | 0.51 |



|               |               |        |          |          |                |              |          |          |              |              |      |
|---------------|---------------|--------|----------|----------|----------------|--------------|----------|----------|--------------|--------------|------|
| MAP-3-31      | 0.0900        | 0.0001 | 0.348416 | 0.000016 | 3<br>0.51125   | 6<br>0.00002 | 0.510786 | 1<br>0.4 | 7<br>-26.90  | -16.46       | 0.47 |
| MAP-3-32      | 0.0911        | 0.0001 | 0.348419 | 0.000013 | 9<br>0.51126   | 4<br>0.00002 | 0.510781 | 7<br>0.5 | 3<br>-26.88  | -16.56       | 0.53 |
| MAP-3-33      | 0.0913        | 0.0001 | 0.348423 | 0.000014 | 0<br>0.51127   | 7<br>0.00002 | 0.510792 | 3<br>0.5 | 1<br>-26.65  | -16.35       | 0.51 |
| MAP-3-34      | 0.0906        | 0.0001 | 0.348420 | 0.000015 | 2<br>0.51125   | 6<br>0.00002 | 0.510776 | 1<br>0.4 | 1<br>-27.04  | -16.66       | 0.41 |
| MAP-3-35      | 0.0901        | 0.0001 | 0.348421 | 0.000013 | 2<br>0.51126   | 1<br>0.00002 | 0.510796 | 1<br>0.5 | 1<br>-26.71  | -16.28       | 0.51 |
| MAP-3-36      | 0.0899        | 0.0001 | 0.348416 | 0.000015 | 9<br>0.51124   | 6<br>0.00002 | 0.510768 | 1<br>0.5 | 3<br>-27.27  | -16.82       | 0.53 |
| MAP-3-37      | 0.0902        | 0.0001 | 0.348424 | 0.000015 | 0<br>0.51123   | 7<br>0.00002 | 0.510764 | 3<br>0.4 | 1<br>-27.31  | -16.89       | 0.41 |
| MAP-3-38      | 0.0908        | 0.0001 | 0.348433 | 0.000015 | 8<br>0.51126   | 1<br>0.00002 | 0.510785 | 1<br>0.4 | 5<br>-26.84  | -16.49       | 0.45 |
| MAP-3-39      | 0.0919        | 0.0001 | 0.348432 | 0.000014 | 2<br>0.51128   | 3<br>0.00002 | 0.510805 | 5<br>0.4 | 9<br>-26.35  | -16.12       | 0.49 |
| MAP-3-40      | 0.0922        | 0.0001 | 0.348423 | 0.000015 | 7<br>0.51126   | 5<br>0.00002 | 0.510784 | 9<br>0.3 | 9<br>-26.72  | -16.52       | 0.39 |
| <b>Mean</b>   | <b>0.0907</b> |        |          |          | <b>0.51124</b> |              |          |          | <b>-27.2</b> | <b>-16.8</b> |      |
| <b>2SD</b>    | <b>0.0017</b> |        |          |          | <b>0.00003</b> |              |          |          | <b>0.7</b>   | <b>0.6</b>   |      |
| <b>RSD(%)</b> | <b>1.87</b>   |        |          |          | <b>0.01</b>    |              |          |          | <b>-2.44</b> | <b>-3.56</b> |      |
| Durango-01    | 0.0947        | 0.0002 | 0.348431 | 0.000014 | 4<br>0.51245   | 0.00002      | 0.511955 |          |              |              |      |



---

|          |        |        |          |          |              |              |          |        |          |        |      |
|----------|--------|--------|----------|----------|--------------|--------------|----------|--------|----------|--------|------|
| MAP-3-7  | 0.0907 | 0.0001 | 0.348410 | 0.000015 | 0.51125<br>5 | 0.00002<br>5 | 0.510778 | -26.98 | 0.4<br>9 | -16.58 | 0.49 |
| MAP-3-8  | 0.0911 | 0.0001 | 0.348423 | 0.000013 | 0.51125<br>6 | 0.00002<br>5 | 0.510778 | -26.96 | 0.4<br>9 | -16.60 | 0.49 |
| MAP-3-9  | 0.0912 | 0.0001 | 0.348415 | 0.000015 | 0.51128<br>3 | 0.00002<br>6 | 0.510804 | -26.43 | 0.5<br>1 | -16.09 | 0.51 |
| MAP-3-10 | 0.0914 | 0.0001 | 0.348416 | 0.000018 | 0.51124<br>8 | 0.00002<br>9 | 0.510768 | -27.11 | 0.5<br>7 | -16.79 | 0.57 |
| MAP-3-11 | 0.0915 | 0.0001 | 0.348429 | 0.000015 | 0.51126<br>0 | 0.00002<br>3 | 0.510779 | -26.88 | 0.4<br>5 | -16.57 | 0.45 |
| MAP-3-12 | 0.0915 | 0.0001 | 0.348408 | 0.000016 | 0.51127<br>1 | 0.00002<br>7 | 0.510791 | -26.67 | 0.5<br>3 | -16.35 | 0.53 |
| MAP-3-13 | 0.0914 | 0.0001 | 0.348437 | 0.000015 | 0.51124<br>8 | 0.00002<br>3 | 0.510768 | -27.11 | 0.4<br>5 | -16.79 | 0.45 |
| MAP-3-14 | 0.0910 | 0.0001 | 0.348428 | 0.000014 | 0.51127<br>3 | 0.00002<br>2 | 0.510795 | -26.63 | 0.4<br>3 | -16.26 | 0.43 |
| MAP-3-15 | 0.0907 | 0.0001 | 0.348425 | 0.000014 | 0.51126<br>7 | 0.00002<br>5 | 0.510790 | -26.74 | 0.4<br>9 | -16.35 | 0.49 |
| MAP-3-16 | 0.0908 | 0.0001 | 0.348420 | 0.000015 | 0.51122<br>7 | 0.00002<br>6 | 0.510750 | -27.52 | 0.5<br>1 | -17.14 | 0.51 |
| MAP-3-17 | 0.0908 | 0.0001 | 0.348419 | 0.000016 | 0.51124<br>5 | 0.00002<br>4 | 0.510768 | -27.17 | 0.4<br>7 | -16.78 | 0.47 |
| MAP-3-18 | 0.0907 | 0.0001 | 0.348423 | 0.000015 | 0.51125<br>7 | 0.00003<br>0 | 0.510781 | -26.94 | 0.5<br>9 | -16.54 | 0.59 |
| MAP-3-19 | 0.0904 | 0.0001 | 0.348434 | 0.000014 | 0.51126<br>7 | 0.00002<br>4 | 0.510792 | -26.74 | 0.4<br>7 | -16.32 | 0.47 |
| MAP-3-20 | 0.0902 | 0.0001 | 0.348421 | 0.000015 | 0.51126      | 0.00002      | 0.510794 | -26.72 | 0.4      | -16.27 | 0.49 |

|          |        |        |          |          |              |              |          |        |          |        |      |
|----------|--------|--------|----------|----------|--------------|--------------|----------|--------|----------|--------|------|
| MAP-3-21 | 0.0900 | 0.0001 | 0.348416 | 0.000014 | 0.51125<br>0 | 0.00002<br>4 | 0.510777 | -27.08 | 0.4<br>7 | -16.60 | 0.47 |
| MAP-3-22 | 0.0895 | 0.0001 | 0.348419 | 0.000018 | 0.51126<br>3 | 0.00002<br>4 | 0.510793 | -26.82 | 0.4<br>7 | -16.30 | 0.47 |
| MAP-3-23 | 0.0894 | 0.0001 | 0.348434 | 0.000014 | 0.51125<br>5 | 0.00002<br>7 | 0.510786 | -26.98 | 0.5<br>3 | -16.44 | 0.53 |
| MAP-3-24 | 0.0901 | 0.0001 | 0.348425 | 0.000014 | 0.51122<br>8 | 0.00002<br>3 | 0.510755 | -27.50 | 0.4<br>5 | -17.05 | 0.45 |
| MAP-3-25 | 0.0906 | 0.0001 | 0.348421 | 0.000016 | 0.51124<br>1 | 0.00002<br>6 | 0.510765 | -27.25 | 0.5<br>1 | -16.84 | 0.51 |
| MAP-3-26 | 0.0904 | 0.0001 | 0.348408 | 0.000013 | 0.51128<br>0 | 0.00002<br>3 | 0.510805 | -26.49 | 0.4<br>5 | -16.06 | 0.45 |
| MAP-3-27 | 0.0902 | 0.0001 | 0.348433 | 0.000014 | 0.51123<br>9 | 0.00002<br>6 | 0.510765 | -27.29 | 0.5<br>1 | -16.84 | 0.51 |
| MAP-3-28 | 0.0904 | 0.0001 | 0.348437 | 0.000013 | 0.51125<br>7 | 0.00002<br>5 | 0.510782 | -26.94 | 0.4<br>9 | -16.51 | 0.49 |
| MAP-3-29 | 0.0903 | 0.0001 | 0.348428 | 0.000015 | 0.51125<br>9 | 0.00002<br>3 | 0.510785 | -26.90 | 0.4<br>5 | -16.46 | 0.45 |
| MAP-3-30 | 0.0905 | 0.0001 | 0.348424 | 0.000018 | 0.51126<br>4 | 0.00002<br>3 | 0.510789 | -26.80 | 0.4<br>5 | -16.38 | 0.45 |
| MAP-3-31 | 0.0908 | 0.0001 | 0.348427 | 0.000015 | 0.51127<br>0 | 0.00002<br>4 | 0.510793 | -26.69 | 0.4<br>7 | -16.30 | 0.47 |
| MAP-3-32 | 0.0911 | 0.0001 | 0.348422 | 0.000019 | 0.51123<br>1 | 0.00002<br>2 | 0.510753 | -27.45 | 0.4<br>3 | -17.09 | 0.43 |
| MAP-3-33 | 0.0916 | 0.0001 | 0.348411 | 0.000014 | 0.51125<br>8 | 0.00002<br>5 | 0.510777 | -26.92 | 0.4<br>9 | -16.62 | 0.49 |
| MAP-3-34 | 0.0916 | 0.0001 | 0.348427 | 0.000015 | 0.51126      | 0.00002      | 0.510781 | -26.84 | 0.4      | -16.54 | 0.49 |

|               |               |        |          |          |                      |              |          |              |          |              |      |
|---------------|---------------|--------|----------|----------|----------------------|--------------|----------|--------------|----------|--------------|------|
| MAP-3-35      | 0.0919        | 0.0001 | 0.348433 | 0.000015 | 0.51130<br>5         | 0.00002<br>7 | 0.510822 | -26.00       | 0.5<br>3 | -15.74       | 0.53 |
| MAP-3-36      | 0.0923        | 0.0001 | 0.348407 | 0.000013 | 0.51128<br>2         | 0.00002<br>7 | 0.510797 | -26.45       | 0.5<br>3 | -16.22       | 0.53 |
| MAP-3-37      | 0.0929        | 0.0001 | 0.348436 | 0.000015 | 0.51124<br>5         | 0.00002<br>9 | 0.510757 | -27.17       | 0.5<br>7 | -17.01       | 0.57 |
| MAP-3-38      | 0.0927        | 0.0001 | 0.348427 | 0.000012 | 0.51126<br>4         | 0.00002<br>7 | 0.510777 | -26.80       | 0.5<br>3 | -16.62       | 0.53 |
| MAP-3-39      | 0.0924        | 0.0001 | 0.348436 | 0.000015 | 0.51128<br>0         | 0.00002<br>8 | 0.510794 | -26.49       | 0.5<br>5 | -16.28       | 0.55 |
| MAP-3-40      | 0.0920        | 0.0001 | 0.348423 | 0.000015 | 0.51128<br>0         | 0.00002<br>6 | 0.510797 | -26.49       | 0.5<br>1 | -16.23       | 0.51 |
| <b>Mean</b>   | <b>0.0909</b> |        |          |          | <b>0.51125<br/>8</b> |              |          | <b>-26.9</b> |          | <b>-16.5</b> |      |
| <b>2SD</b>    | <b>0.0017</b> |        |          |          | <b>0.00003<br/>4</b> |              |          | <b>0.7</b>   |          | <b>0.6</b>   |      |
| <b>RSD(%)</b> | <b>1.83</b>   |        |          |          | <b>0.01</b>          |              |          | <b>-2.43</b> |          | <b>-3.73</b> |      |
| Durango-01    | 0.0945        | 0.0002 | 0.348435 | 0.000013 | 0.51247<br>2         | 0.00002<br>4 | 0.511975 |              |          |              |      |
| Durango-02    | 0.0946        | 0.0002 | 0.348435 | 0.000016 | 0.51247<br>9         | 0.00002<br>4 | 0.511982 |              |          |              |      |
| Durango-03    | 0.0946        | 0.0002 | 0.348422 | 0.000014 | 0.51248<br>3         | 0.00002<br>1 | 0.511986 |              |          |              |      |
| Durango-04    | 0.0945        | 0.0002 | 0.348418 | 0.000013 | 0.51245<br>8         | 0.00002<br>2 | 0.511961 |              |          |              |      |
| Durango-05    | 0.0946        | 0.0002 | 0.348427 | 0.000014 | 0.51246              | 0.00002      | 0.511965 |              |          |              |      |



---

|          |        |        |          |          |              |              |          |        |     |        |      |
|----------|--------|--------|----------|----------|--------------|--------------|----------|--------|-----|--------|------|
| MAP-3-11 | 0.0917 | 0.0002 | 0.348441 | 0.000018 | 0.51124<br>0 | 0.00003<br>2 | 0.510759 | -27.26 | 1   | -16.54 | 0.62 |
| MAP-3-12 | 0.0921 | 0.0001 | 0.348428 | 0.000015 | 0.51122<br>9 | 0.00002<br>6 | 0.510745 | -27.49 | 2   | -16.82 | 0.52 |
| MAP-3-13 | 0.0919 | 0.0002 | 0.348404 | 0.000017 | 0.51125<br>8 | 0.00003<br>0 | 0.510775 | -26.92 | 9   | -16.22 | 0.60 |
| MAP-3-14 | 0.0920 | 0.0002 | 0.348420 | 0.000017 | 0.51123<br>2 | 0.00003<br>1 | 0.510748 | -27.43 | 1   | -16.75 | 0.61 |
| MAP-3-15 | 0.0925 | 0.0001 | 0.348441 | 0.000015 | 0.51124<br>5 | 0.00002<br>4 | 0.510759 | -27.18 | 7   | -16.54 | 0.47 |
| MAP-3-16 | 0.0924 | 0.0001 | 0.348447 | 0.000016 | 0.51126<br>8 | 0.00002<br>6 | 0.510783 | -26.72 | 1   | -16.08 | 0.51 |
| MAP-3-17 | 0.0923 | 0.0001 | 0.348430 | 0.000017 | 0.51121<br>9 | 0.00002<br>9 | 0.510734 | -27.68 | 7   | -17.03 | 0.57 |
| MAP-3-18 | 0.0917 | 0.0002 | 0.348430 | 0.000015 | 0.51124<br>3 | 0.00003<br>2 | 0.510761 | -27.22 | 3   | -16.50 | 0.63 |
| MAP-3-19 | 0.0918 | 0.0001 | 0.348413 | 0.000015 | 0.51125<br>5 | 0.00002<br>8 | 0.510773 | -26.98 | 5   | -16.27 | 0.55 |
| MAP-3-20 | 0.0916 | 0.0001 | 0.348422 | 0.000015 | 0.51124<br>5 | 0.00002<br>6 | 0.510764 | -27.17 | 0   | -16.45 | 0.50 |
| MAP-3-21 | 0.0917 | 0.0001 | 0.348401 | 0.000015 | 0.51123<br>1 | 0.00002<br>4 | 0.510750 | -27.44 | 6   | -16.72 | 0.46 |
| MAP-3-22 | 0.0917 | 0.0001 | 0.348446 | 0.000014 | 0.51125<br>4 | 0.00002<br>7 | 0.510772 | -27.00 | 2   | -16.29 | 0.53 |
| MAP-3-23 | 0.0913 | 0.0001 | 0.348426 | 0.000015 | 0.51125<br>0 | 0.00002<br>8 | 0.510770 | -27.08 | 6   | -16.32 | 0.56 |
| MAP-3-24 | 0.0914 | 0.0001 | 0.348407 | 0.000014 | 0.51125      | 0.00002      | 0.510775 | -26.98 | 0.5 | -16.23 | 0.52 |

---

|          |        |        |          |          |                   |                   |          |        |          |        |      |
|----------|--------|--------|----------|----------|-------------------|-------------------|----------|--------|----------|--------|------|
| MAP-3-25 | 0.0914 | 0.0001 | 0.348413 | 0.000015 | 5<br>0.51123<br>3 | 7<br>0.00002<br>7 | 0.510753 | -27.40 | 2<br>0.5 | -16.65 | 0.52 |
| MAP-3-26 | 0.0908 | 0.0001 | 0.348429 | 0.000016 | 9<br>0.51124      | 8<br>0.00002      | 0.510772 | -27.10 | 6<br>0.5 | -16.29 | 0.56 |
| MAP-3-27 | 0.0907 | 0.0001 | 0.348425 | 0.000015 | 2<br>0.51125      | 5<br>0.00002      | 0.510775 | -27.04 | 8<br>0.4 | -16.22 | 0.48 |
| MAP-3-28 | 0.0907 | 0.0001 | 0.348425 | 0.000015 | 2<br>0.51125      | 5<br>0.00002      | 0.510775 | -27.04 | 8<br>0.4 | -16.22 | 0.48 |
| MAP-3-29 | 0.0901 | 0.0001 | 0.348409 | 0.000015 | 2<br>0.51126      | 0<br>0.00003      | 0.510789 | -26.85 | 8<br>0.5 | -15.96 | 0.58 |
| MAP-3-30 | 0.0899 | 0.0001 | 0.348413 | 0.000015 | 4<br>0.51126      | 9<br>0.00002      | 0.510792 | -26.81 | 6<br>0.5 | -15.91 | 0.57 |
| MAP-3-31 | 0.0907 | 0.0001 | 0.348412 | 0.000017 | 0<br>0.51125      | 8<br>0.00002      | 0.510774 | -27.07 | 4<br>0.5 | -16.25 | 0.54 |
| MAP-3-32 | 0.0913 | 0.0001 | 0.348437 | 0.000014 | 4<br>0.51120      | 5<br>0.00002      | 0.510725 | -27.96 | 9<br>0.4 | -17.20 | 0.49 |
| MAP-3-33 | 0.0914 | 0.0001 | 0.348422 | 0.000014 | 3<br>0.51119      | 6<br>0.00002      | 0.510713 | -28.18 | 1<br>0.5 | -17.44 | 0.51 |
| MAP-3-34 | 0.0913 | 0.0001 | 0.348462 | 0.000017 | 3<br>0.51125      | 7<br>0.00002      | 0.510773 | -27.02 | 2<br>0.5 | -16.26 | 0.52 |
| MAP-3-35 | 0.0911 | 0.0001 | 0.348411 | 0.000014 | 7<br>0.51120      | 9<br>0.00002      | 0.510728 | -27.92 | 6<br>0.5 | -17.14 | 0.56 |
| MAP-3-36 | 0.0913 | 0.0001 | 0.348410 | 0.000015 | 4<br>0.51124      | 5<br>0.00002      | 0.510764 | -27.19 | 8<br>0.4 | -16.44 | 0.48 |
| MAP-3-37 | 0.0910 | 0.0001 | 0.348429 | 0.000015 | 2<br>0.51124      | 7<br>0.00002      | 0.510765 | -27.22 | 2<br>0.5 | -16.43 | 0.52 |
| MAP-3-38 | 0.0910 | 0.0001 | 0.348429 | 0.000014 | 5<br>0.51124      | 7<br>0.00002      | 0.510766 | -27.20 | 0.5      | -16.41 | 0.56 |



|               |               |        |          |          |                |         |          |              |     |              |      |
|---------------|---------------|--------|----------|----------|----------------|---------|----------|--------------|-----|--------------|------|
|               |               |        |          |          | 3              | 9       |          |              | 6   |              |      |
| MAP-3-39      | 0.0911        | 0.0001 | 0.348420 | 0.000016 | 0.51126        | 0.00002 | 0.510787 |              | 0.5 |              |      |
|               |               |        |          |          | 5              | 7       |          | -26.78       | 3   | -16.00       | 0.53 |
| MAP-3-40      | 0.0915        | 0.0001 | 0.348445 | 0.000014 | 0.51126        | 0.00002 | 0.510781 |              | 0.5 |              |      |
|               |               |        |          |          | 2              | 6       |          | -26.85       | 1   | -16.10       | 0.51 |
| <b>Mean</b>   | <b>0.0913</b> |        |          |          | <b>0.51124</b> |         |          |              |     |              |      |
|               |               |        |          |          | <b>2</b>       |         |          | <b>-27.2</b> |     | <b>-16.5</b> |      |
| <b>2SD</b>    | <b>0.0011</b> |        |          |          | <b>0.00003</b> |         |          |              |     |              |      |
|               |               |        |          |          | <b>7</b>       |         |          | <b>0.7</b>   |     | <b>0.8</b>   |      |
| <b>RSD(%)</b> | <b>1.24</b>   |        |          |          | <b>0.01</b>    |         |          | <b>-2.68</b> |     | <b>-4.63</b> |      |
| Durango-01    | 0.0863        | 0.0002 | 0.348430 | 0.000017 | 0.51243        | 0.00003 | 0.511982 |              |     |              |      |
|               |               |        |          |          | 5              | 3       |          |              |     |              |      |
| Durango-02    | 0.0869        | 0.0001 | 0.348411 | 0.000017 | 0.51243        | 0.00003 | 0.511975 |              |     |              |      |
|               |               |        |          |          | 1              | 0       |          |              |     |              |      |
| Durango-03    | 0.0865        | 0.0001 | 0.348429 | 0.000017 | 0.51244        | 0.00002 | 0.511987 |              |     |              |      |
|               |               |        |          |          | 1              | 9       |          |              |     |              |      |
| Durango-04    | 0.0869        | 0.0001 | 0.348428 | 0.000017 | 0.51240        | 0.00002 | 0.511948 |              |     |              |      |
|               |               |        |          |          | 4              | 7       |          |              |     |              |      |
| Durango-05    | 0.0866        | 0.0001 | 0.348413 | 0.000018 | 0.51241        | 0.00003 | 0.511957 |              |     |              |      |
|               |               |        |          |          | 2              | 1       |          |              |     |              |      |
| <b>Mean</b>   | <b>0.0866</b> |        |          |          | <b>0.51242</b> |         |          |              |     |              |      |
|               |               |        |          |          | <b>5</b>       |         |          |              |     |              |      |
| <b>2SD</b>    | <b>0.0005</b> |        |          |          | <b>0.00003</b> |         |          |              |     |              |      |
|               |               |        |          |          | <b>2</b>       |         |          |              |     |              |      |
| <b>RSD(%)</b> | <b>0.62</b>   |        |          |          | <b>0.01</b>    |         |          |              |     |              |      |

Note: Durango as secondary RMs

Session 5 of CAGS @ 40  $\mu\text{m}$ , 15  $\text{J}\cdot\text{cm}^{-2}$ , 5 Hz

|          |        |        |          |          |              |              |          |        |          |        |      |
|----------|--------|--------|----------|----------|--------------|--------------|----------|--------|----------|--------|------|
| MAP-3-1  | 0.0910 | 0.0002 | 0.348403 | 0.000032 | 0.51121<br>5 | 0.00003<br>2 | 0.510738 | -27.75 | 0.6<br>3 | -16.96 | 0.63 |
| MAP-3-2  | 0.0913 | 0.0001 | 0.348414 | 0.000018 | 0.51122<br>8 | 0.00003<br>1 | 0.510749 | -27.50 | 0.6<br>0 | -16.74 | 0.60 |
| MAP-3-3  | 0.0917 | 0.0001 | 0.348422 | 0.000016 | 0.51122<br>7 | 0.00002<br>9 | 0.510745 | -27.52 | 0.5<br>7 | -16.81 | 0.57 |
| MAP-3-4  | 0.0919 | 0.0001 | 0.348433 | 0.000016 | 0.51126<br>0 | 0.00003<br>2 | 0.510777 | -26.88 | 0.6<br>3 | -16.19 | 0.63 |
| MAP-3-5  | 0.0920 | 0.0001 | 0.348438 | 0.000016 | 0.51123<br>8 | 0.00003<br>1 | 0.510755 | -27.31 | 0.6<br>0 | -16.63 | 0.60 |
| MAP-3-6  | 0.0926 | 0.0001 | 0.348434 | 0.000015 | 0.51119<br>7 | 0.00003<br>1 | 0.510711 | -28.11 | 0.6<br>0 | -17.49 | 0.60 |
| MAP-3-7  | 0.0925 | 0.0001 | 0.000017 | 0.348406 | 0.51123<br>0 | 0.00003<br>3 | 0.510744 | -27.47 | 0.6<br>4 | -16.84 | 0.64 |
| MAP-3-8  | 0.0927 | 0.0001 | 0.348445 | 0.000014 | 0.51125<br>3 | 0.00002<br>9 | 0.510766 | -27.02 | 0.5<br>6 | -16.40 | 0.56 |
| MAP-3-9  | 0.0930 | 0.0001 | 0.348427 | 0.000016 | 0.51124<br>3 | 0.00002<br>7 | 0.510755 | -27.21 | 0.5<br>2 | -16.62 | 0.52 |
| MAP-3-10 | 0.0921 | 0.0001 | 0.348447 | 0.000016 | 0.51122<br>2 | 0.00002<br>6 | 0.510738 | -27.62 | 0.5<br>0 | -16.94 | 0.50 |
| MAP-3-11 | 0.0915 | 0.0001 | 0.348409 | 0.000016 | 0.51122<br>1 | 0.00002<br>9 | 0.510741 | -27.64 | 0.5<br>6 | -16.90 | 0.56 |
| MAP-3-12 | 0.0915 | 0.0001 | 0.348412 | 0.000015 | 0.51121<br>9 | 0.00003<br>0 | 0.510738 | -27.68 | 0.5<br>9 | -16.95 | 0.59 |
| MAP-3-13 | 0.0916 | 0.0001 | 0.348424 | 0.000015 | 0.51125<br>7 | 0.00002<br>8 | 0.510776 | -26.94 | 0.5<br>4 | -16.21 | 0.54 |
| MAP-3-14 | 0.0918 | 0.0001 | 0.348430 | 0.000017 | 0.51125      | 0.00002      | 0.510777 | -26.90 | 0.5      | -16.19 | 0.57 |

---

|          |        |        |          |          |                   |                   |          |        |               |        |      |
|----------|--------|--------|----------|----------|-------------------|-------------------|----------|--------|---------------|--------|------|
| MAP-3-15 | 0.0911 | 0.0002 | 0.348436 | 0.000016 | 9<br>0.51125<br>0 | 9<br>0.00003<br>4 | 0.510772 | -27.07 | 6<br>0.6<br>5 | -16.30 | 0.66 |
| MAP-3-16 | 0.0912 | 0.0001 | 0.348415 | 0.000015 | 4<br>0.51123<br>4 | 0<br>0.00003<br>0 | 0.510754 | -27.40 | 0.5<br>8      | -16.63 | 0.58 |
| MAP-3-17 | 0.0911 | 0.0001 | 0.348429 | 0.000017 | 5<br>0.51125<br>5 | 0<br>0.00003<br>0 | 0.510777 | -26.97 | 0.5<br>8      | -16.19 | 0.58 |
| MAP-3-18 | 0.0911 | 0.0001 | 0.348429 | 0.000017 | 5<br>0.51125<br>5 | 0<br>0.00003<br>0 | 0.510777 | -26.97 | 0.5<br>8      | -16.19 | 0.58 |
| MAP-3-19 | 0.0901 | 0.0001 | 0.348421 | 0.000016 | 8<br>0.51119<br>8 | 7<br>0.00002<br>7 | 0.510725 | -28.08 | 0.5<br>3      | -17.20 | 0.53 |
| MAP-3-20 | 0.0905 | 0.0001 | 0.348427 | 0.000016 | 1<br>0.51126<br>1 | 0<br>0.00003<br>0 | 0.510786 | -26.85 | 0.5<br>9      | -16.02 | 0.59 |
| MAP-3-21 | 0.0913 | 0.0001 | 0.348428 | 0.000017 | 2<br>0.51124<br>2 | 8<br>0.00002<br>8 | 0.510763 | -27.23 | 0.5<br>4      | -16.47 | 0.54 |
| MAP-3-22 | 0.0913 | 0.0001 | 0.348418 | 0.000015 | 2<br>0.51124<br>2 | 0<br>0.00003<br>0 | 0.510763 | -27.23 | 0.5<br>9      | -16.47 | 0.59 |
| MAP-3-23 | 0.0909 | 0.0001 | 0.348419 | 0.000014 | 7<br>0.51124<br>7 | 5<br>0.00002<br>5 | 0.510769 | -27.14 | 0.4<br>8      | -16.34 | 0.48 |
| MAP-3-24 | 0.0911 | 0.0001 | 0.348439 | 0.000015 | 7<br>0.51124<br>7 | 6<br>0.00002<br>6 | 0.510768 | -27.14 | 0.5<br>0      | -16.37 | 0.50 |
| MAP-3-25 | 0.0911 | 0.0001 | 0.348440 | 0.000016 | 3<br>0.51120<br>3 | 8<br>0.00002<br>8 | 0.510724 | -28.00 | 0.5<br>5      | -17.22 | 0.55 |
| MAP-3-26 | 0.0911 | 0.0001 | 0.348410 | 0.000014 | 0<br>0.51122<br>0 | 9<br>0.00002<br>9 | 0.510742 | -27.66 | 0.5<br>7      | -16.88 | 0.57 |
| MAP-3-27 | 0.0915 | 0.0001 | 0.348429 | 0.000014 | 8<br>0.51124<br>8 | 7<br>0.00002<br>7 | 0.510767 | -27.11 | 0.5<br>4      | -16.38 | 0.54 |
| MAP-3-28 | 0.0914 | 0.0001 | 0.348411 | 0.000016 | 0.51127           | 0.00003           | 0.510790 | -26.69 | 0.5           | -15.94 | 0.59 |

|          |        |        |          |          |         |         |          |        |     |        |      |
|----------|--------|--------|----------|----------|---------|---------|----------|--------|-----|--------|------|
|          |        |        |          |          | 0       | 0       |          |        | 9   |        |      |
| MAP-3-29 | 0.0917 | 0.0001 | 0.348413 | 0.000015 | 0.51126 | 0.00002 | 0.510778 | -26.88 | 0.5 | -16.16 | 0.53 |
|          |        |        |          |          | 0       | 7       |          |        | 3   |        |      |
| MAP-3-30 | 0.0921 | 0.0002 | 0.348409 | 0.000016 | 0.51128 | 0.00003 | 0.510803 | -26.37 | 0.6 | -15.69 | 0.61 |
|          |        |        |          |          | 6       | 1       |          |        | 1   |        |      |
| MAP-3-31 | 0.0925 | 0.0002 | 0.348419 | 0.000017 | 0.51125 | 0.00003 | 0.510772 | -26.92 | 0.6 | -16.29 | 0.63 |
|          |        |        |          |          | 8       | 2       |          |        | 2   |        |      |
| MAP-3-32 | 0.0929 | 0.0002 | 0.348426 | 0.000014 | 0.51125 | 0.00003 | 0.510770 | -26.92 | 0.5 | -16.32 | 0.59 |
|          |        |        |          |          | 8       | 0       |          |        | 9   |        |      |
| MAP-3-33 | 0.0931 | 0.0002 | 0.348424 | 0.000017 | 0.51127 | 0.00003 | 0.510788 | -26.55 | 0.6 | -15.97 | 0.60 |
|          |        |        |          |          | 7       | 1       |          |        | 0   |        |      |
| MAP-3-34 | 0.0935 | 0.0001 | 0.348433 | 0.000017 | 0.51129 | 0.00003 | 0.510805 | -26.17 | 0.6 | -15.64 | 0.61 |
|          |        |        |          |          | 6       | 1       |          |        | 1   |        |      |
| MAP-3-35 | 0.0929 | 0.0002 | 0.348419 | 0.000017 | 0.51126 | 0.00003 | 0.510773 | -26.87 | 0.6 | -16.27 | 0.67 |
|          |        |        |          |          | 1       | 4       |          |        | 7   |        |      |
| MAP-3-36 | 0.0927 | 0.0001 | 0.348427 | 0.000018 | 0.51126 | 0.00002 | 0.510778 | -26.79 | 0.5 | -16.17 | 0.54 |
|          |        |        |          |          | 5       | 8       |          |        | 4   |        |      |
| MAP-3-37 | 0.0917 | 0.0001 | 0.348423 | 0.000016 | 0.51126 | 0.00003 | 0.510782 | -26.82 | 0.5 | -16.10 | 0.58 |
|          |        |        |          |          | 3       | 0       |          |        | 8   |        |      |
| MAP-3-38 | 0.0910 | 0.0001 | 0.348419 | 0.000018 | 0.51127 | 0.00003 | 0.510792 | -26.68 | 0.6 | -15.89 | 0.60 |
|          |        |        |          |          | 0       | 1       |          |        | 0   |        |      |
| MAP-3-39 | 0.0906 | 0.0002 | 0.348437 | 0.000017 | 0.51122 | 0.00003 | 0.510749 | -27.57 | 0.6 | -16.74 | 0.63 |
|          |        |        |          |          | 5       | 2       |          |        | 3   |        |      |

**Mean**

**0.0917**

**0.51124**

**5**

**-27.2**

**-16.5**

**2SD**

**0.0016**

**0.00004**

**6**

**0.9**

**0.9**

**RSD(%)**

**1.74**

**0.01**

**-3.32**

**-5.17**

---

|            |        |        |          |          |              |              |          |
|------------|--------|--------|----------|----------|--------------|--------------|----------|
| Durango-01 | 0.0866 | 0.0001 | 0.348409 | 0.000018 | 0.51246<br>1 | 0.00002<br>9 | 0.512006 |
| Durango-02 | 0.0866 | 0.0001 | 0.348425 | 0.000017 | 0.51242<br>5 | 0.00002<br>8 | 0.511970 |
| Durango-03 | 0.0865 | 0.0001 | 0.348422 | 0.000017 | 0.51241<br>8 | 0.00002<br>9 | 0.511964 |
| Durango-04 | 0.0866 | 0.0001 | 0.348435 | 0.000017 | 0.51247<br>4 | 0.00003<br>0 | 0.512019 |
| Durango-05 | 0.0869 | 0.0001 | 0.348434 | 0.000017 | 0.51248<br>2 | 0.00002<br>6 | 0.512026 |

**Mean**

**0.0866**

**0.51245**

**2**

**2SD**

**0.0003**

**0.00005**

**8**

**RSD(%)**

**0.35**

**0.01**

Note: Durango as secondary RMs
