# Supplementary figures and images for: Apatite MAP-3: a new homogeneous and low common lead natural reference for laser in situ U–Pb dating and Nd isotope analysis
Source: Royal Society of Chemistry journal article supplement (doi:10.1039/d2ja00405d), 2023-01-01

**Figure S1**

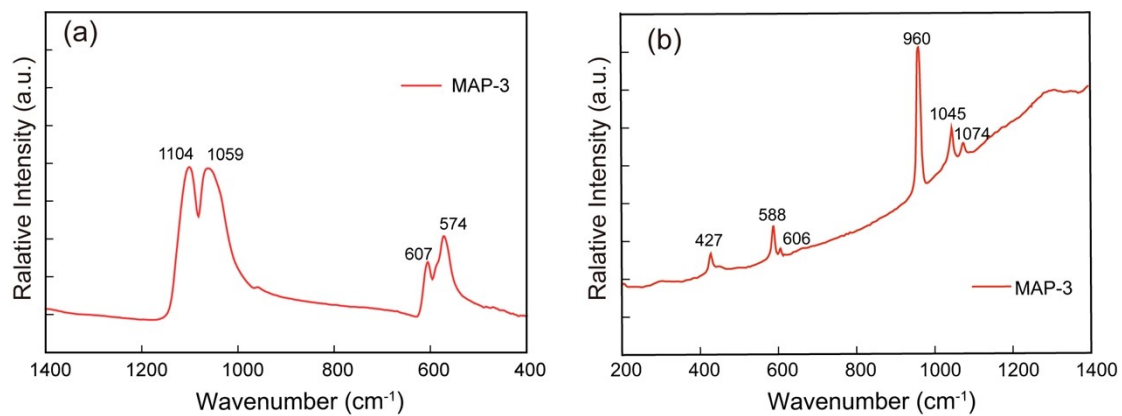

**Figure S2**

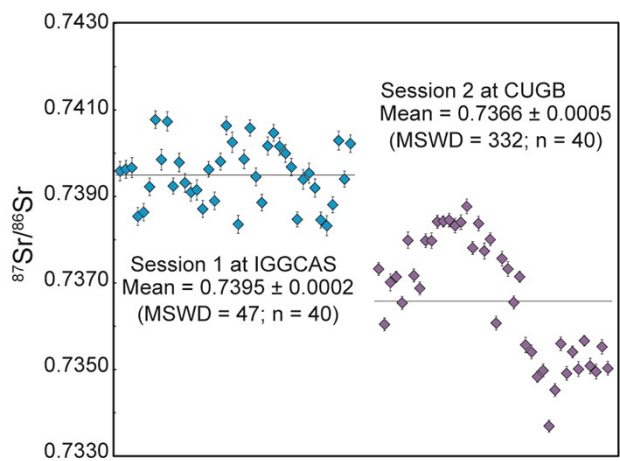

**Figure S3**

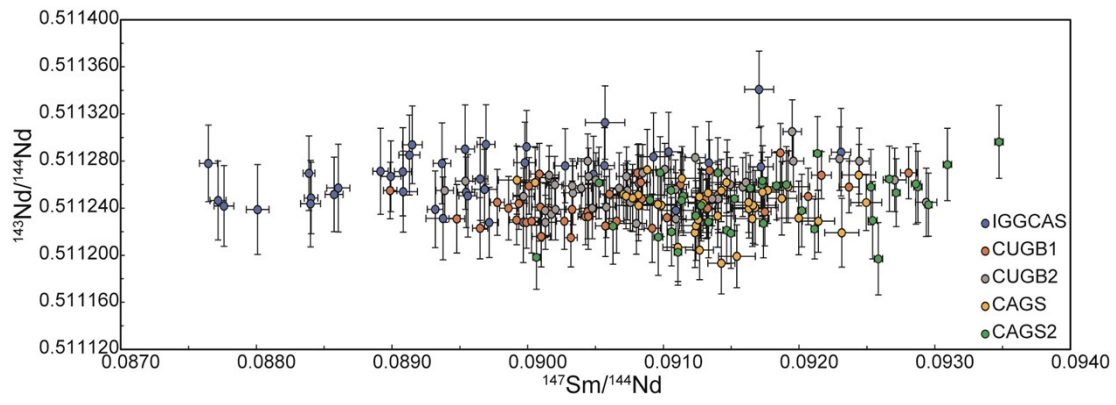

Supplement: d2ja00405d2.pdf [file d2ja00405d2.pdf]
